# Supplementary material for: The "recognition", "belief", and "action" regarding conspiracy theories: An empirical study using large-scale samples from the United States and Japan
Source: Research Square preprint supplement (doi:10.21203/rs.3.rs-6263282/v1), 2025-04-21
Supplement: Supplementary file 1 [file a9b9c3fa3cbf3e7851c03be5.pdf]

Supplementary Information of The “recognition”,  
“belief”, and “action” regarding conspiracy  
theories: An empirical study using large-scale  
samples from the United States and Japan

## Appendix A Construction of Outcome Variables

To systematically capture the progression from initial awareness to behavioral action, we constructed three sequential outcome variables for each conspiracy theory: Recognition, Belief, and Action (Demonstrative and Diffusion Actions). The conspiracy statements used in the survey are listed below, along with the coding process for each outcome stage.

### A.1 Conspiracy Statements

Respondents were presented with 11 conspiracy theories relevant to their country, adapted from contemporary or historically prominent conspiracy claims.

#### United States:

- **U.consp1:** The idea of man-made global warming is a hoax that was invented to deceive people.
- **U.consp2:** The truth about the harmful effects of vaccines is being deliberately hidden from the public.
- **U.consp3:** Regardless of who is officially in charge of governments and other organisations, there is a single group of people who secretly control events and rule the world together.
- **U.consp4:** The 1969 moon landings were faked.
- **U.consp5:** Humanoid reptiles are becoming leaders of various countries and controlling humanity.
- **U.consp6:** Democratic Party members are involved in organizes criminal activities.
- **U.consp7:** Coronavirus is a myth created by some powerful forces, and the virus does not really exist.
- **U.consp8:** Human have made contact with aliens and this fact has been deliberately hidden from the public.
- **U.consp9:** The US Government knowingly helped to make the 9/11 terrorist attacks happen in America on 11 September, 2001.

- **U.consp10:** There was electoral fraud by the Biden camp in the 2020 U.S. presidential election.
- **U.consp11:** The government is spraying harmful substances from the sky (chem-trails).

#### Japan:

- **J.consp1:** The idea of man-made global warming is a hoax that was invented to deceive people.
- **J.consp2:** The truth about the harmful effects of vaccines is being deliberately hidden from the public.
- **J.consp3:** Regardless of who is officially in charge of governments and other organisations, there is a single group of people who secretly control events and rule the world together.
- **J.consp4:** Foreign residents in Japan are manipulating politicians and the media.
- **J.consp5:** The major earthquakes that have occurred in Japan so far are artificial earthquakes.
- **J.consp6:** Humanoid reptiles are becoming leaders of various countries and controlling humanity.
- **J.consp7:** Coronavirus is a myth created by some powerful forces, and the virus does not really exist.
- **J.consp8:** Human have made contact with aliens and this fact has been deliberately hidden from the public.
- **J.consp9:** The US Government knowingly helped to make the 9/11 terrorist attacks happen in America on 11 September, 2001.
- **J.consp10:** There was electoral fraud by the Biden camp in the 2020 U.S. presidential election.
- **J.consp11:** The government is spraying harmful substances from the sky (chem-trails).

## A.2 Recognition

For each of the 11 conspiracy statements, respondents were asked:

“Have you seen or heard the following information?” 1. Have seen or heard 2. Don’t know

If they answered “Have seen or heard” the variable **Recognition** was coded as 1 for that particular conspiracy.

## A.3 Belief

Respondents who recognized each conspiracy were subsequently asked:

“What do you think about the truthfulness of the following information?” 1. I believe it is true 2. I don’t know 3. I believe it is false”

We then constructed a binary variable **Belief**, coded as 1 if the respondent selected “I believe it is true.”



## A.4 Action

Respondents who expressed belief in at least one conspiracy theory were further asked whether they had engaged in any of the following actions related to that belief (multiple selections allowed):

1. I have had an argument with family friends, or acquaintances about this information.
2. I have attended a gathering related to this information (offline : street demonstrations, offline meeting, etc.).
3. I have attended a gathering related to this information (online: social media communities, online meetings, etc.).
4. I have contacted someone involved regarding this information.
5. I have disseminated this information (offline: street advocacy, leaflet distribution ,etc.).
6. I have disseminated this information (online: on X, Facebook, Instagram (including just repost or share), online forums, etc.).
7. I have talked to family, friends, or acquaintances about this information.

For analytical purposes, these responses were aggregated into two distinct outcome variables:

- **Demonstrative Action** was coded as 1 if the respondent selected at least one of items 1 through 4.
- **Diffusion Action** was coded as 1 if the respondent selected at least one of items 5 through 7.

## Appendix B Construction of Explanatory Variables

This section details the construction of the explanatory variables summarized in Table 1. Unless otherwise noted, the variables were measured consistently across the U.S. and Japan. The coding rules and normalization procedures applied to each variable are detailed below. The distributions of the explanatory variables, obtained from the survey responses are shown in Figures S3 - S8 for the U.S. and Japan, respectively.

### B.1 Urbanization

United States: Respondents indicated their place of residence among six options:

1. In a large city (over 250,000)
2. In a suburb near a large city
3. In a medium-sized city (50,000–250,000)
4. In a small city or town (under 50,000)
5. On a farm
6. In open country but not on a farm

Japan: Respondents indicated their place of residence from four options:

1. Tokyo’s 23 wards or a government-designated city

- 108 2. A prefectural capital (excluding category 1)
- 109 3. Other Cities
- 110 4. Towns or Villages

111 We coded **Urbanization** = 1 if category 1 was selected, and 0 otherwise.

## 112 B.2 Educational Attainment

113 We asked respondents to select the highest level of schooling they completed:

- 114 1. Graduate School
- 115 2. University
- 116 3. Junior College / Technical College
- 117 4. Vocational / Specialized School
- 118 5. High School
- 119 6. Middle School
- 120 7. Unknown

121 **Bachelor's degree** was coded as 1 if respondents chose at least a university-level edu-  
 122 cation (categories 1 or 2), while **Postgraduate Degree** was coded as 1 if respondents  
 123 chose graduate-level education (category 1). Parental education was also collected.

## 124 B.3 Household Income

125 We obtained information on total household income, using country-specific bracketed  
 126 categories. In the United States, income was reported in 18 brackets, ranging from  
 127 "Under \$1,000" to "\$170,000 or over." In Japan, income was reported in 17 brackets,  
 128 rangin from "No income (0 JPY)" to "Over 20 million JPY." Each income bracket was  
 129 converted to its midpoint (e.g., \$1,000-\$4,999 was assigned a value of \$3,000), and  
 130 subsequently normalized so that \$100,000 in the U.S. and 10 million JPY in Japan  
 131 were both corresponded to 1.

## 132 B.4 Employment Status

133 Respondents reported their current employment status from the following 13 cate-  
 134 gories:

- 135 1. Executives / Directors
- 136 2. Full-time Employee (Senior Manager and above)
- 137 3. Full-time Employee (Manager)
- 138 4. Full-time Employee (Assistant Manager/Supervisor)
- 139 5. Full-time Employee (General Staff)
- 140 6. Self-employed / Business Owner
- 141 7. Family Worker
- 142 8. Temporary / Contract Employee
- 143 9. Part-time / Temporary (including Student Part-time)
- 144 10. Freelancer
- 145 11. Unemployed (including Homemakers)
- 146 12. Retired (Pensioner)

147 13. Student

148 **Permanent Employee** was coded as 1 for respondents selecting categories 2 to 5,  
149 and **Student** was coded as 1 for those selecting category 13.

## 150 B.5 Company Size

151 Respondents were asked about the size of their working firm:

- 152 1. 1 – 4 employees
- 153 2. 5 - 9 employees
- 154 3. 10 - 29 employees
- 155 4. 30 - 99 employees
- 156 5. 100 - 299 employees
- 157 6. 300 - 499 employees
- 158 7. 500 - 999 employees
- 159 8. 1,000 employees or more

160 We have created three binary variables: **Small Company** = 1 if the respondent  
161 selected categories 3 or 4 (10-99 employees), **Medium-sized Company** = 1 if the  
162 respondent selected categories 5, 6, or 7 (100-999 employees), and **Large Company**  
163 = 1 if category 8 was selected (1,000 or more employees).

## 164 B.6 Political Orientation

165 We constructed two continuous indices, **Political Polarization** and **Conservative**  
166 **Orientation**, based on respondents' political preferences.

167 United States: Respondents rated ten policy issues (e.g., constitutional amendment,  
168 social security, same-sex marriage, nuclear power plants, immigration, etc.) on 7-point  
169 scales based on [1], as shown below:

- 170 1. Abortion should be legalized
- 171 2. Same-sex marriage should be legalized
- 172 3. Prayer in schools should be mandatory
- 173 4. The death penalty should be implemented
- 174 5. The right to bear arms should be guaranteed
- 175 6. Military spending should be increased
- 176 7. Marijuana should be legalized
- 177 8. Immigration should be restricted
- 178 9. The government should reduce the income gap
- 179 10. The rich should be taxed more

180 Japan: Respondents similarly rated ten political issues (e.g., constitutional revision,  
181 social security, same-sex marriage, nuclear power plants, immigration, etc.) on 7-point  
182 scales based on [2], as shown below:

- 183 1. Article 9 of the Constitution should be amended
- 184 2. Social security spending should be increased
- 185 3. Married couples should be allowed to have separate surnames

- 186 4. Environmental protection should be prioritized over economic growth
- 187 5. Nuclear power plants should be immediately abolished
- 188 6. The government should guarantee a certain level of employment and income
- 189 7. Schools should teach children patriotism
- 190 8. An increase in foreign immigrants is bad for Japan
- 191 9. The Liberal Democratic Party is trying to return Japan to the dark pre-war era
- 192 10. Same-sex marriage should be recognized

193 We aggregated each respondent’s left-right positioning on the 7-point scale. **Con-**  
 194 **servative Orientation** was coded as a binary variable, with respondents who selected  
 195 positions closer to the conservative end of the scale were coded as 1, and those selected  
 196 positions closer to the liberal end were coded as 0. **Political Polarization** was com-  
 197 puted by rescaling the left-right scale from -1 (most liberal) to +1 (most conservative),  
 198 and taking the absolute value of each respondent’s position, so that higher values indi-  
 199 cate a stronger ideological leaning toward one pole. The final index was normalized  
 200 to range from 0 (most moderate) to 1 (most extreme).

## 201 B.7 Trust in Government and Scientists

202 Respondents rated their trust in the government and in scientists on a 7-point scale.  
 203 For each target, responses were recoded into a binary variable, where responses indi-  
 204 cating trust were coded as 1. This recoding allows for a simplified measure of trust  
 205 orientation, that distinguishes between trust and distrust.

## 206 B.8 Religiosity

207 We measured belief in the afterlife, heaven, hell, religious miracles, the spiritual power  
 208 of ancestors, and God, based on ISSP 2018 [3]. Each item was recoded into a binary  
 209 variable, where belief was coded as 1 and non-belief coded as 0. The **Religiosity** score  
 210 was calculated as the sum of these binary responses, normalized to range from 0 (no  
 211 belief) to 1 (belief in all).

## 212 B.9 Media Usage Habits

213 We asked about average daily usage of seven types of media:

- 214 1. Social media (e.g., X, Instagram, Facebook)
- 215 2. Video platforms (e.g., YouTube, Netflix)
- 216 3. Television and newspapers (including online editions)
- 217 4. Radio and magazines (including online editions)
- 218 5. Online news websites
- 219 6. Messaging apps (e.g., LINE, Messenger, WhatsApp)
- 220 7. Personal websites and blogs

221 For each medium, respondents reported their average usage time separately for week-  
 222 days and weekends, using a 10-point scale ranging from “0 minutes” to “5 hours or  
 223 more.” We calculated the midpoint of each bracket to obtain a numerical estimate  
 224 of usage time and then calculated the average daily usage. Each medium was then

225 recoded as a binary variable, with each media usage = 1 if the average daily usage  
226 exceeded 30 minutes.

## 227 **B.10 Cultural Capital (at Age 15)**

228 Following SSM2015 [4], we asked whether the respondent's household had each of six  
229 items at age 15: a child's own room, a study desk, a piano, literary collections/encyclo-  
230 pedias, a computer/word processor, or art/antiques. Each "yes" response was assigned  
231 1 point, and the total (0-6) was normalized to a range of 0 - 1 (with 6 points = 1).

## 232 **B.11 Economic Capital (at Age 15)**

233 Following [5], we asked whether the respondent's household had each of the following  
234 twelve items at age 15: a privately-owned home, a bathroom, a sofa set, a television,  
235 a radio, a DVD player, a refrigerator, a microwave, a telephone, a camera, an air  
236 conditioner, or a car. Each "yes" response was assigned 1 point, and the total (0-12)  
237 was normalized to a range of 0-1 range (with 12 points = 1).

## 238 **B.12 Having Books**

239 Respondents reported the approximate number of books in their household at age 15,  
240 and currently in their home. Possible responses ranged from "10 or fewer" to "501 or  
241 more," in seven ordered categories based on SSM2015 [4]. We assigned the midpoint  
242 of each category, then normalized so that 100 books = 1.

## 243 **B.13 Reading Books**

244 Respondents reported on a 6-point scale how many books they read in a year. Possible  
245 responses ranged from "Does not read books at all" to "More than 21 books," in six  
246 ordered categories based on SSM2015 [4] and GSS2022 [6]. We assigned the midpoint  
247 of each category, then normalized so that 10 books = 1.

## 248 **B.14 Number of Friends**

249 We asked: "If you divide the people you know into 'friends' and 'acquaintances,' how  
250 many would you consider 'friends'?" We took the numeric answer and normalized it  
251 so that 100 friends = 1.

## 252 **B.15 Social Class**

253 Respondents self-reported their perceived social class on a 9-point scale:

- 254 1. Upper Class – Upper
- 255 2. Upper Class – Middle
- 256 3. Upper Class – Lower
- 257 4. Middle Class – Upper
- 258 5. Middle Class – Middle
- 259 6. Middle Class – Lower

- 260 7. Lower Class – Upper
- 261 8. Lower Class – Middle
- 262 9. Lower Class – Lower

263 We constructed binary indicators for both current social class and social class at age  
 264 15. Specifically, respondents who identified with any of the “Upper Class” categories  
 265 (items 1-3) were classified as **Upper**, while those selecting any of the “Lower Class”  
 266 categories (items 7-9) were classified as **Lower**. These classifications were applied to  
 267 both the respondents’ current perceived social class and their perceived social class  
 268 at age 15. Based on these classifications, we defined **Upward Social Mobility** as  
 269 a binary variable, coded as 1 if the respondent’s current perceived social class was  
 270 higher than their perceived social class at age 15.

## 271 Appendix C Model Validation and Posterior 272 Predictive Checks

### 273 C.1 Posterior Predictive Checks

274 To evaluate the adequacy of our multivariate Bernoulli model, we conducted posterior  
 275 predictive checks (PPCs) on the four outcome variables: Recognition, Belief, Demon-  
 276 strative Action, and Diffusion Action. First, we examined the alignment between the  
 277 model’s predicted probabilities and the observed proportions in the empirical data,  
 278 ensuring that the model accurately captured the rate of occurrence for each outcome.  
 279 In addition, we compared summary statistics, such as the overall mean of each out-  
 280 come, between the posterior predictive distribution and the observed data to further  
 281 evaluate model performance.

282 Figures S31 and S32 illustrate these checks for the U.S. and Japan, respectively.  
 283 Figures (a), (c), (e), and (g) compare the observed frequencies with the those predicted  
 284 frequencies, showing strong alignment across outcomes. Figures (b), (d), (f), and (h)  
 285 compare summary statistics for the observed data with samples from the posterior  
 286 predictive distribution. These results confirm that the model does not systematically  
 287 underestimate or overestimate event probabilities, thereby supporting the validity of  
 288 our modeling assumptions.

### 289 C.2 Convergence Diagnosis

290 All Markov chain Monte Carlo simulations achieved acceptable levels of convergence,  
 291 with Gelman-Rubin statistics ( $\hat{R}$ ) meeting standard thresholds. For the U.S. models,  
 292 all parameters achieved  $\hat{R} \leq 1.01$ . For the Japan models,  $\hat{R} \leq 1.03$ , with only the  
 293 Intercept and Belief coefficients in the Demonstrative and Diffusion outcome models  
 294 slightly exceeding 1.01. Because the parameters with higher  $\hat{R}$  values do not directly  
 295 affect our primary interpretations, this minor deviation does not compromise the  
 296 reliability of our inferences. Moreover, we did not observe any divergent transitions,  
 297 suggesting that the Hamiltonian Monte Carlo sampler was well calibrated. For detailed  
 298 summaries of the convergence metrics and exact parameter estimates, see Tables S7 -  
 299 S14.

### C.3 Robustness Checks of Model Variants

We assessed the robustness of our model through a series of sensitivity analyses by comparing it to several model variants. Specifically, we examined the following variants:

- **Prior distributions:** We replaced our baseline priors with  $\mathcal{N}(0,1)$  (A-1) and  $\mathcal{N}(0,10)$  (A-2).
- **Iteration settings:** We varied the total iterations and warm-up steps to 1,000 iterations with 500 warm-up steps (B-1) and 4,000 iterations with 2,000 warm-up steps (B-2).
- **Adapt delta parameter:** We adjusted `adapt_delta` in the Hamiltonian Monte Carlo algorithm, testing 0.90 (C-1) and 0.99 (C-2).

These sensitivity analyses allowed us to examine the stability of our model under different settings and to assess the impact of hyperparameter variations on model performance.

Tables S15 and S16 summarize the results using the leave-one-out (LOO) information criterion (LOOIC), assessing model fit and predictive performance. For the U.S. data, our primary model achieves a  $\widehat{\text{elpd}}_{\text{LOO}}$  (estimated log predictive density under LOO-CV) of -21557.3 (SE = 76.0). All alternative models differ by less than 3.0 units, and are well within the standard error range (75.9-76.2). A similar pattern is observed for Japan, where our model has an  $\widehat{\text{elpd}}_{\text{LOO}}$  of -20221.1 (SE = 104.0). The alternative specifications produce values ranging from -20219.1 to -20221.1, which are well within the standard error range (104.0), indicating no statistically meaningful improvement in predictive accuracy across model variations.

Moreover, in all cases, the relative magnitude and significance of the regression coefficients remain effectively unchanged, demonstrating that variations in prior distributions, iteration settings, and `adapt_delta` values do not substantially alter the model’s inferences. These robustness checks confirm that our results are robust to reasonable variations, reinforcing the stability of the proposed framework.

## Appendix D Alternative Model Specifications and Robustness Analyses

To further validate the robustness of our findings, we employed alternative modeling approaches to evaluate whether the relationships identified in our main analysis remained consistent across different statistical frameworks. Specifically, we reanalyzed the data using two different statistical frameworks: Structural Equation Modeling (SEM) and Sequential Generalized Linear Models (Sequential GLM). These alternative models serve as a complementary validation of our primary Bayesian hierarchical framework by evaluating whether the results obtained by different methodologies are consistent.

## D.1 Two Statistical Frameworks

**Structural Equation Modeling (SEM)** SEM is a multivariate statistical technique that allows for the simultaneous estimation of multiple regression equations while explicitly modeling direct and indirect effects. Unlike our Bayesian hierarchical model, which estimates all stages jointly under a probabilistic framework, SEM provides a path analysis structure where the relationships between recognition, belief, and action can be analyzed with direct and indirect pathways explicitly specified. The SEM is defined as follows:

$$\begin{aligned}\text{Recognition} &\sim \alpha_r + \beta_r \mathbf{X}, \\ \text{Belief} &\sim \alpha_b + \beta_{b1} \text{Recognition} + \beta_{b2} \mathbf{X}, \\ \text{Demonstrative Action} &\sim \alpha_m + \beta_{m1} \text{Belief} + \beta_{m2} \mathbf{X}, \\ \text{Diffusion Action} &\sim \alpha_f + \beta_{f1} \text{Belief} + \beta_{f2} \mathbf{X}.\end{aligned}$$

where,  $\mathbf{X}$  represents the set of explanatory variables, while  $\alpha$  and  $\beta$  denote the estimated parameters. The key distinction between SEM and our main Bayesian hierarchical model is that SEM explicitly estimates mediation effects rather than relying on hierarchical dependencies. We estimated the model using the weighted least squares mean and variance adjusted (WLSMV) estimator to handle categorical responses.

### Sequential Generalized Linear Models (Sequential GLM)

Sequential GLM provides a more conventional approach to modeling the stepwise process of conspiracy theory engagement. This method involves estimating separate logistic regression models for each stage, treating earlier stages as explanatory variables for subsequent ones. The stepwise GLM model is specified as follows:

$$\begin{aligned}\text{Recognition} &\sim \text{logit}(\alpha_r + \beta_r \mathbf{X}), \\ \text{Belief} &\sim \text{logit}(\alpha_b + \beta_{b1} \text{Recognition} + \beta_{b2} \mathbf{X}), \\ \text{Demonstrative Action} &\sim \text{logit}(\alpha_m + \beta_{m1} \text{Belief} + \beta_{m2} \mathbf{X}), \\ \text{Diffusion Action} &\sim \text{logit}(\alpha_f + \beta_{f1} \text{Belief} + \beta_{f2} \mathbf{X}).\end{aligned}$$

Each equation was estimated separately using a binomial logistic regression model with a logit link function.

## D.2 Results

### Structural Equation Modeling (SEM).

The SEM results exhibit a moderate level of agreement with our Bayesian hierarchical model. In the U.S. sample, the SEM estimates closely match those from the Bayesian model for recognition, belief, and diffusion action, maintaining similar coefficient directions (see Figure S33). However, discrepancies emerge at the demonstrative action stage, where some variables display trends that diverge from the Bayesian estimates. For example, while religiosity is estimated to have a positive effect on demonstrative action in the Bayesian model, the SEM approach suggests a negative



influence. These inconsistencies may be due to high correlations between the outcome variables or to the inherent challenges of modeling categorical mediators within the SEM framework. In the Japanese sample, the SEM results generally align with the Bayesian estimates in terms of the signs of the coefficients at each stage (see Figure S35). However, due to the smaller number of respondents at each stage, none of the estimates achieve statistical significance. This suggests that SEM may struggle to produce stable estimates in the later stages, likely due to the limited smaller sample sizes in these outcome categories. Overall, while SEM captures the core trends identified in our Bayesian model, its limitations in estimating demonstrative and diffusion actions highlight potential instability in estimation, caused by high correlations among outcome variables and the difficulty of modeling categorical mediation.

#### Sequential Generalized Linear Models (Sequential GLM).

In contrast to the SEM results, the Sequential GLM approach exhibits strong consistency with our Bayesian hierarchical model, reinforcing the robustness of our findings. In the U.S. sample, Sequential GLM estimates closely mirror those from the Bayesian model, exhibiting nearly identical coefficient magnitudes and directional effects across all four stages (Figure S34). In the Japanese sample, estimates show somewhat greater variability, likely due to the smaller proportion of respondents engaged in later-stage actions (Figure S36). Nevertheless, the overall pattern of positive and negative relationships remains consistent with the Bayesian model. Although some coefficients lose statistical significance due to reduced sample sizes in demonstrative and diffusion action stages, their estimated directions remain align well with the Bayesian framework

The alternative model analyses provided complementary insights. The SEM results aligned with our Bayesian hierarchical model in the early stages, such as recognition and belief formation, capturing similar trends in coefficient directions. However, in the later stages, particularly demonstrative and diffusion actions, the estimates differed, likely due to high correlations among the outcome variables and the complexity of modeling categorical mediation. In contrast, the Sequential GLM approach closely matched our Bayesian framework, showing consistent coefficient magnitudes and directional effects across all stages. These results collectively strengthen the validity of our Bayesian hierarchical model and its ability to represent the processes of conspiracy theory recognition, belief formation, and subsequent actions.

## Appendix E Complete Separation for Hierarchical Bayesian Framework

In our hierarchical Bayesian framework, we observe exceptionally large coefficients for **Recognition** when predicting **Belief**. For example, the posterior median of the **Belief\_Recognition** coefficient reaches approximately 33.904 in Table S8. Such extreme values characterize “complete separation” in logistic regression models, where one or more predictors perfectly (or nearly perfectly) distinguish outcome classes [7]. In this study, Recognition serves as a nearly perfect discriminator between those who hold conspiracy beliefs and those who do not, leading to an exceptionally large coefficient in the Belief model. Although Bayesian estimation prevents coefficients

410 from diverging to infinity, the posterior median may still grow to a very large value,  
411 effectively reflecting the near-deterministic role of the predictor [8].

412 A key concern is whether such complete separation in one parameter necessar-  
413 ily undermines the interpretation or stability of other parameter estimates. In our  
414 model, even though the Belief\_Recognition coefficient (along with similarly structured  
415 parameters from preceding stages) is notably large, other coefficients remain stable,  
416 exhibiting neither unusual distortions nor inflated posterior intervals, see Appendix C.  
417 This observation is consistent with the notion that if the separating predictor is not  
418 highly correlated with other variables, complete separation in a single parameter does  
419 not induce systemic bias or instability in the rest of the model [9, 10].

420 In summary, our findings indicate that a variable of complete or quasi-complete  
421 separation does not invalidate the entire model. In particular, the separating param-  
422 eter is not strongly correlated with other variables, and diagnostic checks such  
423 as posterior correlations and effective sample sizes reveal no anomalous behavior.  
424 Accordingly, the interpretability and inferential validity of other covariates remain  
425 robust.

## 426 **Appendix F Modeling Conspiracy Engagement** 427 **Intensity by Hierarchical Zero-inflated** 428 **Binomial Model**

429 The primary analyses in this study employed a hierarchical Bayesian Bernoulli  
430 model to capture the sequential progression of conspiracy theory engagement across  
431 recognition, belief, demonstrative action, and diffusion action. While this framework  
432 effectively models each stage as a binary outcome, it does not account for the intensity  
433 of engagement, namely, the number of conspiracy theories an individual recognizes,  
434 believes in, or acts upon. To ensure the robustness of our findings, we develop an  
435 alternative hierarchical Bayesian model that treats the outcome of each stage as a  
436 count variable, capturing the number of conspiracy theories an individual engages  
437 with at each stage. Specifically, the dependent variables now range from 0 to 11 (the  
438 total number of conspiracy statements in the survey). Given the over-dispersed and  
439 zero-inflated nature of the data, where many respondents report zero engagement, we  
440 adopt a Zero-Inflated Binomial model that accounts for these characteristics.

441 This alternative specification allows us to capture an additional dimension of con-  
442 spiracy theory engagement. While the existing model identifies factors that influence  
443 whether individuals engage with conspiracy theories at all, this approach enables us  
444 to analyze the extent of their engagement. By analyzing the number of conspiracy  
445 theories an individual recognizes, believes in, or acts upon, we can uncover pat-  
446 terns related to the level of engagement, providing complementary insights into the  
447 dynamics underlying conspiracy beliefs and behaviors.

## F.1 Model Specification

The hierarchical model is specified as follows:

$$\begin{aligned} R_c &\sim \text{Zero-Inflated Binomial}(n = 11, p = \text{logit}^{-1}(\alpha_1 + \beta_1 \mathbf{X})) \\ B_c &\sim \text{Zero-Inflated Binomial}(n = 11, p = \text{logit}^{-1}(\alpha_2 + \beta_{21} R_c + \beta_2 \mathbf{X})) \\ M_c &\sim \text{Zero-Inflated Binomial}(n = 11, p = \text{logit}^{-1}(\alpha_3 + \beta_{31} B_c + \beta_3 \mathbf{X})) \\ D_c &\sim \text{Zero-Inflated Binomial}(n = 11, p = \text{logit}^{-1}(\alpha_4 + \beta_{32} B_c + \beta_4 \mathbf{X})) \end{aligned}$$

where  $R_c$  represents the number of conspiracy theories recognized,  $B_c$  represents the number of conspiracy theories believed, conditional on  $R_c$ ,  $B_c$  represents the number of demonstrative actions influenced by  $B_c$ , and  $F_c$  represents the number of diffusion action, which is also dependent on  $B_c$ . The vector  $\mathbf{X}$  contains explanatory variables shared across all models, same as in the hierarchical Bernoulli model, while  $\alpha$  and  $\beta$  are coefficients to be estimated. The model is estimated using a hierarchical Bayesian framework with Hamiltonian Monte Carlo sampling implemented in the `brms` package in R.

This model employs a Zero-Inflated Binomial (ZIB) distribution, which extends the standard binomial model by accounting for an excess number of zeros. This characteristic is particularly useful in cases where a substantial proportion of respondents report no engagement at all (i.e., they recognize, believe in, or act on zero conspiracy theories). The ZIB model combines two components: (1) a binomial process that governs the probability of recognizing, believing in, or acting on a given number of conspiracy theories, and (2) a separate zero-inflation process that explicitly models the probability of observing an excess number of zeros. This approach ensures that we can accurately capture both the presence and intensity of conspiracy engagement while addressing potential overdispersion in the data.

## F.2 Results

Figures S37 and S38 present the estimated effects of the explanatory variables across on the four stages of conspiracy theory engagement, Recognition, Belief, Demonstrative Action, and Diffusion Action, using the hierarchical zero-inflated binomial model. Detailed convergence diagnostics and exact parameter estimates are provided in Tables S17 - S24. Overall, the results obtained from the hierarchical zero-inflated binomial model closely align with those obtained from the simpler binary outcome specification, thereby reinforcing our main findings. However, by shifting from a binary perspective of whether individuals engage in conspiracy theories or not, to a count based framework that captures the level of engagement, some differences in the relative strength of certain predictors emerge. For example, religiosity remains positively associated with conspiracy theory engagement under both models, but its effect is noticeably attenuated under the zero-inflated binomial framework, particularly among Japanese respondents. A similar pattern is observed for traditional media consumption. In the binary model, television and newspaper consumption strongly predict lower engagement with conspiracy theories in Japan. Under the zero-inflated binomial

framework, however, this protective effect becomes less pronounced in Japan, while in the U.S., there is even a partial reversal for certain channels.

## Appendix G Applying Item Response Theory to Survey Data

Item Response Theory (IRT) is a family of psychometric models used to examine how individual latent traits relate to survey items [11]. Unlike traditional approaches, IRT allows for a probabilistic estimation of how likely individuals with varying degrees of conspiratorial thinking are to endorse specific conspiracy beliefs. This approach not only quantifies individual differences but also characterizes the properties of the conspiracy narratives themselves, including their discriminability and the difficulty of adopting them.

In this section, we apply the Graded Response Model (GRM) [12], a variant of IRT suited for ordered categorical responses, to analyze survey data on conspiracy beliefs. We conceptualize conspiratorial thinking as a latent trait and examine how individuals progress through different levels of conspiracy engagement, ranging from mere recognition of a conspiracy theory to belief, and demonstrative and diffusion actions. By estimating discrimination and threshold parameters for each conspiracy belief (U.consp and J.consp), we aim to identify which conspiracy theories are more easily accepted and which require a higher level of conspiratorial thinking for endorsement.

### G.1 Method

To systematically capture the progression from recognition to actions, we classified individual responses into five ordered categories:

- P1: Does not recognize the conspiracy.
- P2: Recognizes the conspiracy but does not believe it.
- P3: Recognizes and believes in it, but does not take action.
- P4: Recognizes, believes, and engages in one type of action (either Demonstrative or Diffusion).
- P5: Recognizes, believes, and engages in both types of actions (Demonstrative and Diffusion).

This five-stage categorization allows us to quantify the escalation of conspiracy endorsement and to examine how belief may transition into action.

To analyze the trajectory, we applied a one-dimensional Graded Response Model (GRM), a widely used IRT model for ordered categorical responses. In this framework, conspiracy belief intensity is treated as a continuous latent trait, allowing us to estimate how different conspiracy theories discriminate between individuals at varying levels of belief intensity. Formally, for each conspiracy item  $i$ , the probability that an individual with latent trait  $\theta$  selects response category  $k$  (where  $k = P1, P2, P3, P4, P5$ ) or higher is given by the cumulative logistic function:

$$P(Y_i \geq k | \theta) = \frac{1}{1 + e^{-a_i(\theta - b_{ik})}} \quad (G1)$$

522 where:

- 523 •  $P(Y_i \geq k \mid \theta)$  is the probability of endorsing category  $k$  or higher.
- 524 •  $a_i$  is the discrimination parameter, indicating how well the item discriminates
- 525 between respondents with different levels of conspiratorial thinking.
- 526 •  $b_{ik}$  is the threshold parameter, representing the level of the latent trait required to
- 527 endorse category  $k$ .
- 528 •  $\theta$  is the individual's latent tendency toward conspiratorial thinking.

529 The discrimination parameter  $a_i$  determines how sharply an item discriminates  
530 between individuals with different levels of conspiracy endorsement. Higher values  
531 of  $a_i$  suggest that even small differences in latent conspiratorial thinking ( $\theta$ ) lead  
532 to substantial increases in the probability of involvement. Meanwhile, the threshold  
533 parameters  $b_{ik}$  indicate the minimum level of conspiratorial inclination required to  
534 transition between different response categories. We estimated the parameters  $a_i$  and  
535  $b_{ik}$  for each conspiracy belief item using maximum likelihood estimation (MLE) via  
536 the `mirt` package (v1.44.0) in R.

## 537 G.2 Results

538 Tables S25 (U.S.) and S26 (Japan) present the estimated discrimination ( $a_i$ ) and  
539 threshold ( $b_{i1}, b_{i2}, b_{i3}, b_{i4}$ ) parameters for each conspiracy item. Figures S39 and S40  
540 further illustrate these findings with Test Information Curves and Item Characteristic  
541 Curves, highlighting the distribution and informativeness of each item.

### 542 Finding in the U.S.

543 In the U.S., certain conspiracy theories, such as U.consp9 (9/11 attacks) and U.consp3  
544 (single secret group), exhibit high discrimination values  $a$ , meaning they sharply dis-  
545 tinguish between individuals based on their level of conspiratorial thinking. That is,  
546 for respondents near the threshold, a small increase in their latent trait  $\theta$  dramati-  
547 cally increases the chance they will go from mere recognition to belief or from belief to  
548 action. In contrast, U.consp10 (2020 election fraud) and U.consp7 (COVID-19 myth)  
549 have lower discrimination values, suggesting that belief in these narratives develops  
550 more gradually.

551 Threshold values  $b$  reveal that some conspiracy theories, such as U.consp2  
552 (vaccine conspiracy), have low  $b_2$  values, meaning that they are more widely recog-  
553 nized and require only a modest level of conspiratorial thinking for belief. On the  
554 other hand, extreme theories such as U.consp5 (reptilian humanoids) and U.consp7  
555 (COVID-19 denial) have higher  $b_3$  values, indicating that only individuals with strong  
556 conspiratorial tendencies move beyond belief to active participation.

### 557 Finding in Japan

558 In Japan, J.consp3 (single group secretly ruling the world), J.consp6 (reptilian  
559 humanoids), and J.consp11 (chemtrails) have high discrimination ( $a$  values are large),  
560 meaning that small increases in conspiratorial thinking significantly raise the likeli-  
561 hood of endorsement. Conversely, J.consp8 (alien contact) has lower discrimination.

Threshold values indicate that J.consp2 (vaccines) has a low  $b_2$  values, meaning that even individuals with moderate conspiratorial thinking are likely to enter the belief stage (P3). In contrast, J.consp6 (reptilian humanoids), J.consp7 (COVID-19 myth), and J.consp8 (alien contact) require a much stronger conspiratorial inclination before individuals progress from belief to action (P4).

In both countries, vaccine conspiracies (U.consp2 and J.consp2) and climate change denial (U.consp1 and J.consp1) have lower recognition thresholds ( $b_1$  values are small), making them more widely accepted. In contrast, extreme theories such as reptilian humanoids (U.consp5 and J.consp6), COVID-19 denial (U.consp7 and J.consp7), and alien contact (U.consp8 and J.consp8) require a higher level of conspiratorial thinking for active endorsement. These results suggest that conspiracy beliefs exist on a spectrum, with some theories being widely accepted while others remain highly exclusive, appealing only to those with strong conspiratorial tendencies.

**Table S1:** Gender and age distribution of the sample in Japan

|              | Male  | Female | Others | Total  |
|--------------|-------|--------|--------|--------|
| <b>20s</b>   | 1,180 | 1,205  | 14     | 2,399  |
| <b>30s</b>   | 1,375 | 1,425  | 8      | 2,808  |
| <b>40s</b>   | 1,844 | 1,935  | 15     | 3,794  |
| <b>50s</b>   | 2,018 | 2,119  | 19     | 4,156  |
| <b>60s</b>   | 1,698 | 1,826  | 12     | 3,536  |
| <b>Total</b> | 8,115 | 8,510  | 68     | 16,693 |

**Table S2:** Gender and age distribution of the sample in the U.S.

|              | Male  | Female | Others | Total  |
|--------------|-------|--------|--------|--------|
| <b>20s</b>   | 1,028 | 1,262  | 34     | 2,324  |
| <b>30s</b>   | 1,190 | 1,322  | 21     | 2,533  |
| <b>40s</b>   | 1,188 | 1,381  | 12     | 2,581  |
| <b>50s</b>   | 1,388 | 1,522  | 5      | 2,915  |
| <b>60s</b>   | 1,497 | 1,720  | 8      | 3,225  |
| <b>Total</b> | 6,291 | 7,207  | 80     | 13,578 |

|                  | I have had an argument with family friends, or acquaintances about this information. | I have attended a gathering related to this information (offline : street demonstrations, offline meeting, etc.). | I have attended a gathering related to this information (online: social media communities, online meetings, etc.). | I have contacted someone involved regarding this information. |
|------------------|--------------------------------------------------------------------------------------|-------------------------------------------------------------------------------------------------------------------|--------------------------------------------------------------------------------------------------------------------|---------------------------------------------------------------|
| <b>U.consp1</b>  | 671 (4.94%)                                                                          | 196 (1.44%)                                                                                                       | 175 (1.29%)                                                                                                        | 80 (0.59%)                                                    |
| <b>U.consp2</b>  | 1,446 (10.65%)                                                                       | 313 (2.31%)                                                                                                       | 320 (2.36%)                                                                                                        | 148 (1.09%)                                                   |
| <b>U.consp3</b>  | 1,212 (8.93%)                                                                        | 275 (2.03%)                                                                                                       | 297 (2.19%)                                                                                                        | 123 (0.91%)                                                   |
| <b>U.consp4</b>  | 622 (4.58%)                                                                          | 138 (1.02%)                                                                                                       | 152 (1.12%)                                                                                                        | 60 (0.44%)                                                    |
| <b>U.consp5</b>  | 350 (2.58%)                                                                          | 143 (1.05%)                                                                                                       | 125 (0.92%)                                                                                                        | 45 (0.33%)                                                    |
| <b>U.consp6</b>  | 1,024 (7.54%)                                                                        | 227 (1.67%)                                                                                                       | 238 (1.75%)                                                                                                        | 102 (0.75%)                                                   |
| <b>U.consp7</b>  | 651 (4.79%)                                                                          | 169 (1.24%)                                                                                                       | 168 (1.24%)                                                                                                        | 74 (0.54%)                                                    |
| <b>U.consp8</b>  | 1,130 (8.32%)                                                                        | 250 (1.84%)                                                                                                       | 265 (1.95%)                                                                                                        | 113 (0.83%)                                                   |
| <b>U.consp9</b>  | 929 (6.84%)                                                                          | 240 (1.77%)                                                                                                       | 240 (1.77%)                                                                                                        | 104 (0.77%)                                                   |
| <b>U.consp10</b> | 1,175 (8.65%)                                                                        | 254 (1.87%)                                                                                                       | 267 (1.97%)                                                                                                        | 115 (0.85%)                                                   |
| <b>U.consp11</b> | 904 (6.66%)                                                                          | 232 (1.71%)                                                                                                       | 253 (1.86%)                                                                                                        | 105 (0.77%)                                                   |

**Table S3:** Percentage of respondents in the U.S. selecting each option of demonstrative actions.

|                  | I have disseminated this information (offline: street advocacy, leaflet distribution, etc.). | I have disseminated this information (online: on X, Facebook, Instagram (including just repost or share), online forums, etc.). | I have talked to family, friends, or acquaintances about this information. |
|------------------|----------------------------------------------------------------------------------------------|---------------------------------------------------------------------------------------------------------------------------------|----------------------------------------------------------------------------|
| <b>U.consp1</b>  | 141 (1.04%)                                                                                  | 225 (1.66%)                                                                                                                     | 708 (5.21%)                                                                |
| <b>U.consp2</b>  | 226 (1.66%)                                                                                  | 446 (3.28%)                                                                                                                     | 1,631 (12.01%)                                                             |
| <b>U.consp3</b>  | 193 (1.42%)                                                                                  | 389 (2.86%)                                                                                                                     | 1,329 (9.79%)                                                              |
| <b>U.consp4</b>  | 100 (0.74%)                                                                                  | 185 (1.36%)                                                                                                                     | 573 (4.22%)                                                                |
| <b>U.consp5</b>  | 78 (0.57%)                                                                                   | 106 (0.78%)                                                                                                                     | 211 (1.55%)                                                                |
| <b>U.consp6</b>  | 170 (1.25%)                                                                                  | 363 (2.67%)                                                                                                                     | 1,226 (9.03%)                                                              |
| <b>U.consp7</b>  | 122 (0.90%)                                                                                  | 160 (1.18%)                                                                                                                     | 468 (3.45%)                                                                |
| <b>U.consp8</b>  | 174 (1.28%)                                                                                  | 361 (2.66%)                                                                                                                     | 1,408 (10.37%)                                                             |
| <b>U.consp9</b>  | 168 (1.24%)                                                                                  | 279 (2.05%)                                                                                                                     | 860 (6.33%)                                                                |
| <b>U.consp10</b> | 190 (1.40%)                                                                                  | 361 (2.66%)                                                                                                                     | 1,467 (10.80%)                                                             |
| <b>U.consp11</b> | 164 (1.21%)                                                                                  | 300 (2.21%)                                                                                                                     | 983 (7.24%)                                                                |

**Table S4:** Percentage of respondents in the U.S. selecting each option of diffusion actions.

|                  | I have had an argument with family friends, or acquaintances about this information. | I have attended a gathering related to this information (offline : street demonstrations, offline meeting, etc.). | I have attended a gathering related to this information (online: social media communities, online meetings, etc.). | I have contacted someone involved regarding this information. |
|------------------|--------------------------------------------------------------------------------------|-------------------------------------------------------------------------------------------------------------------|--------------------------------------------------------------------------------------------------------------------|---------------------------------------------------------------|
| <b>J.consp1</b>  | 51 (0.31%)                                                                           | 34 (0.20%)                                                                                                        | 33 (0.20%)                                                                                                         | 8 (0.05%)                                                     |
| <b>J.consp2</b>  | 239 (1.43%)                                                                          | 60 (0.36%)                                                                                                        | 83 (0.50%)                                                                                                         | 24 (0.14%)                                                    |
| <b>J.consp3</b>  | 69 (0.41%)                                                                           | 46 (0.28%)                                                                                                        | 52 (0.31%)                                                                                                         | 8 (0.05%)                                                     |
| <b>J.consp4</b>  | 94 (0.56%)                                                                           | 35 (0.21%)                                                                                                        | 69 (0.41%)                                                                                                         | 20 (0.12%)                                                    |
| <b>J.consp5</b>  | 25 (0.15%)                                                                           | 21 (0.13%)                                                                                                        | 18 (0.11%)                                                                                                         | 2 (0.01%)                                                     |
| <b>J.consp6</b>  | 18 (0.11%)                                                                           | 17 (0.10%)                                                                                                        | 8 (0.05%)                                                                                                          | 1 (0.01%)                                                     |
| <b>J.consp7</b>  | 36 (0.22%)                                                                           | 22 (0.13%)                                                                                                        | 18 (0.11%)                                                                                                         | 7 (0.04%)                                                     |
| <b>J.consp8</b>  | 98 (0.59%)                                                                           | 50 (0.30%)                                                                                                        | 43 (0.26%)                                                                                                         | 11 (0.07%)                                                    |
| <b>J.consp9</b>  | 53 (0.32%)                                                                           | 37 (0.22%)                                                                                                        | 30 (0.18%)                                                                                                         | 5 (0.03%)                                                     |
| <b>J.consp10</b> | 41 (0.25%)                                                                           | 44 (0.26%)                                                                                                        | 42 (0.25%)                                                                                                         | 9 (0.05%)                                                     |
| <b>J.consp11</b> | 26 (0.16%)                                                                           | 20 (0.12%)                                                                                                        | 15 (0.09%)                                                                                                         | 4 (0.02%)                                                     |

**Table S5:** Percentage of respondents in Japan selecting each option of demonstrative actions.

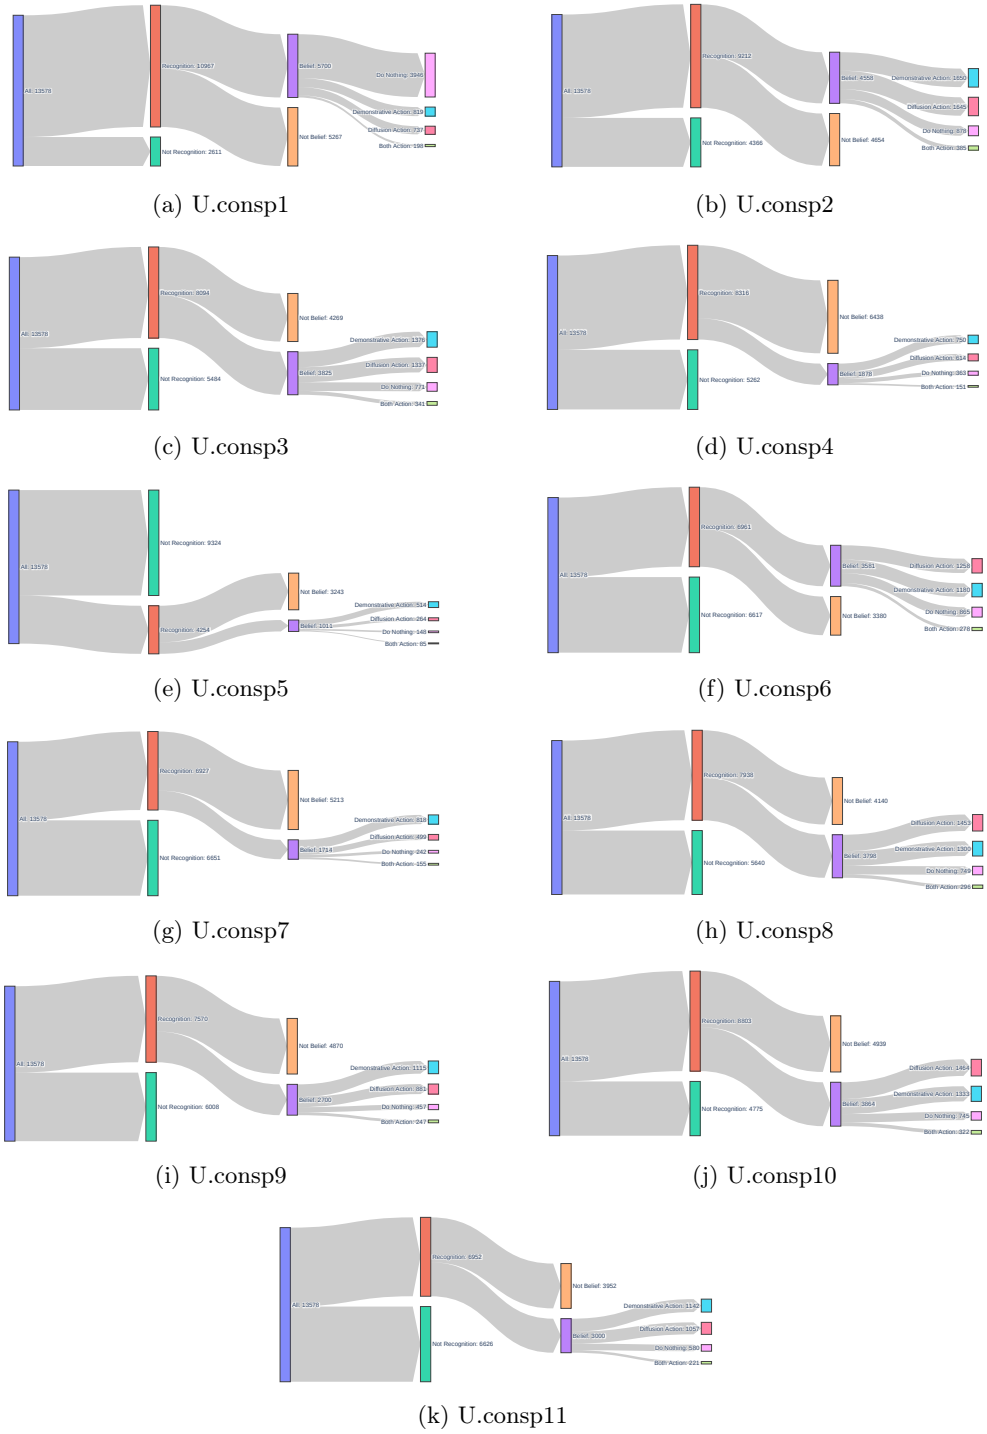

**Fig. S1:** Sankey diagrams showing the sequential stages of conspiracy theory engagement for each of the 11 conspiracy theories investigated in the U.S. Each pair of diagrams visualizes the number of respondents who reported recognizing, believing, and acting upon a particular conspiracy theory.



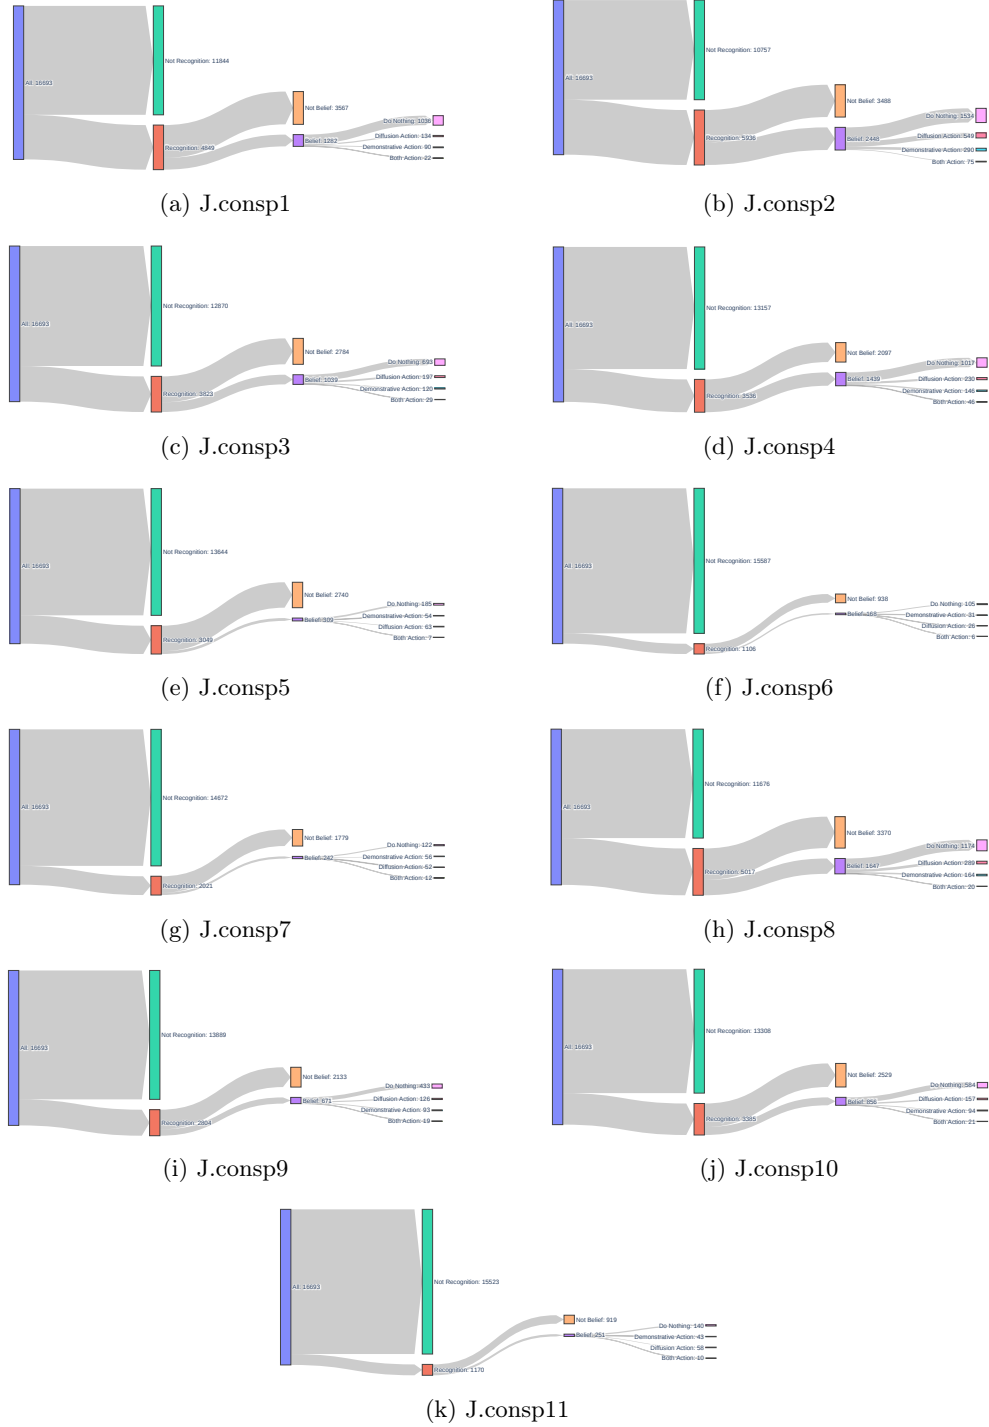

**Fig. S2:** Sankey diagrams showing the sequential stages of conspiracy theory engagement for each of the 11 conspiracy theories investigated in Japan. Each pair of diagrams visualizes the number of respondents who reported recognizing, believing, and acting upon a particular conspiracy theory.

|                  | I have disseminated this information<br>(offline: street advocacy, leaflet<br>distribution, etc.). | I have disseminated this information<br>(online: on X, Facebook, Instagram<br>(including just repost or share),<br>online forums, etc.). | I have talked to family, friends, or<br>acquaintances about this information. |
|------------------|----------------------------------------------------------------------------------------------------|------------------------------------------------------------------------------------------------------------------------------------------|-------------------------------------------------------------------------------|
| <b>J.consp1</b>  | 11 (0.07%)                                                                                         | 28 (0.17%)                                                                                                                               | 131 (0.78%)                                                                   |
| <b>J.consp2</b>  | 21 (0.13%)                                                                                         | 57 (0.34%)                                                                                                                               | 575 (3.44%)                                                                   |
| <b>J.consp3</b>  | 13 (0.08%)                                                                                         | 31 (0.19%)                                                                                                                               | 198 (1.19%)                                                                   |
| <b>J.consp4</b>  | 17 (0.10%)                                                                                         | 57 (0.34%)                                                                                                                               | 228 (1.37%)                                                                   |
| <b>J.consp5</b>  | 4 (0.02%)                                                                                          | 15 (0.09%)                                                                                                                               | 59 (0.35%)                                                                    |
| <b>J.consp6</b>  | 5 (0.03%)                                                                                          | 6 (0.04%)                                                                                                                                | 28 (0.17%)                                                                    |
| <b>J.consp7</b>  | 5 (0.03%)                                                                                          | 16 (0.10%)                                                                                                                               | 51 (0.31%)                                                                    |
| <b>J.consp8</b>  | 8 (0.05%)                                                                                          | 26 (0.16%)                                                                                                                               | 284 (1.70%)                                                                   |
| <b>J.consp9</b>  | 10 (0.06%)                                                                                         | 32 (0.19%)                                                                                                                               | 113 (0.68%)                                                                   |
| <b>J.consp10</b> | 13 (0.08%)                                                                                         | 38 (0.23%)                                                                                                                               | 141 (0.84%)                                                                   |
| <b>J.consp11</b> | 5 (0.03%)                                                                                          | 19 (0.11%)                                                                                                                               | 54 (0.32%)                                                                    |

**Table S6:** Percentage of respondents in Japan selecting each option of diffusion actions.

**Fig. S3:** Distributions of demographic and political attributes in the U.S. sample.

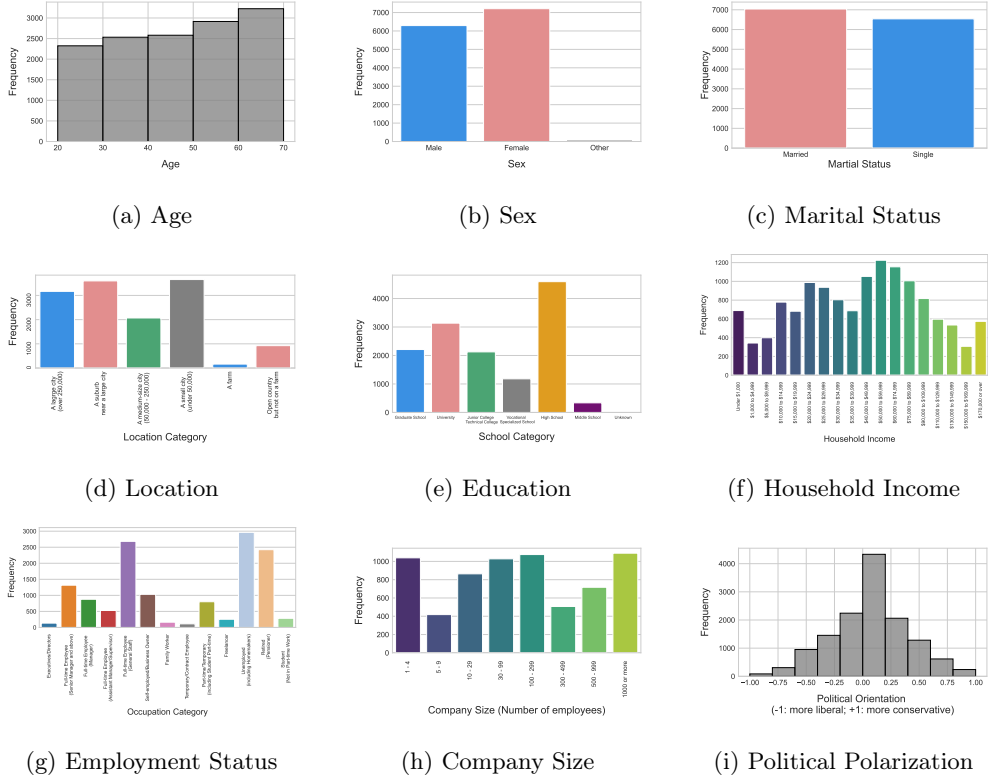

**Fig. S4:** Distributions of trust, religiosity, and media usage in the U.S. sample.

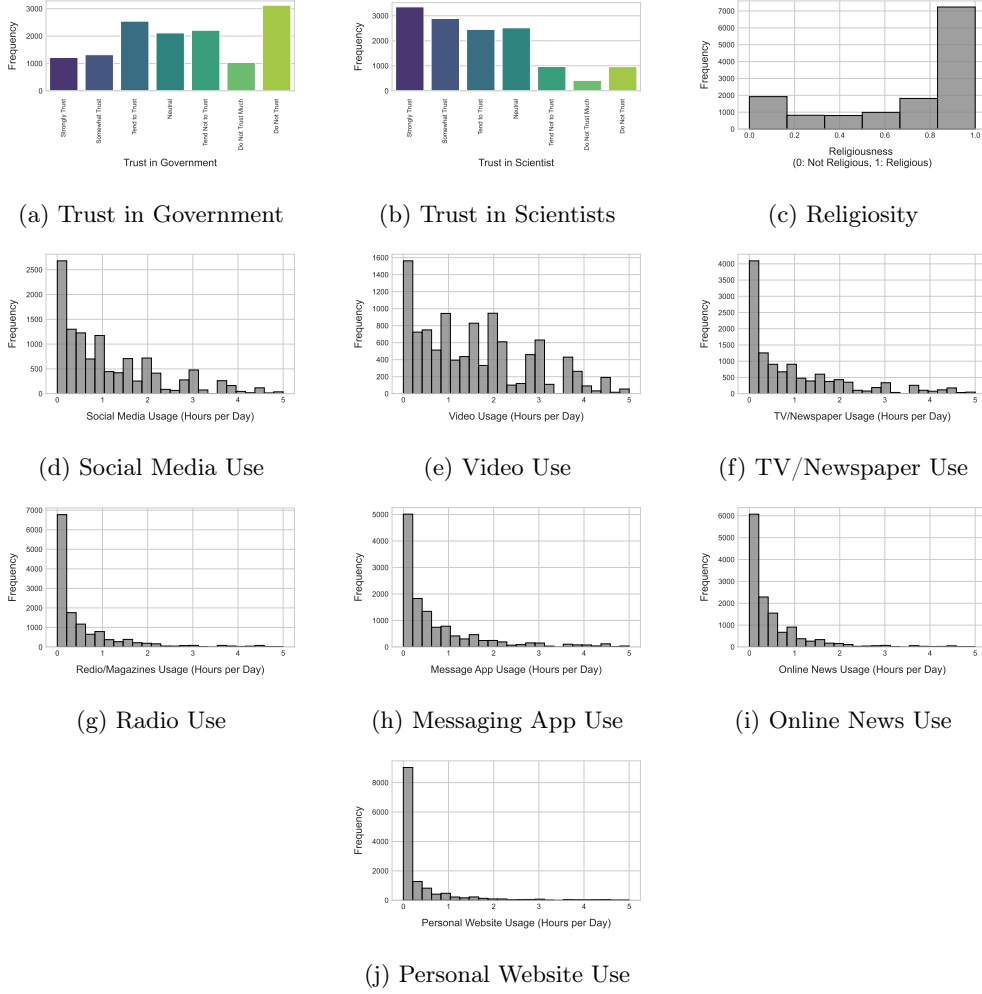

**Fig. S5:** Distributions of social capital attributes in the U.S. sample.

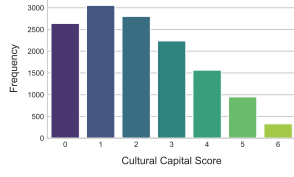

(a) Cultural Capital (Age 15)

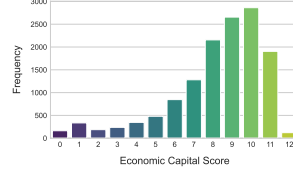

(b) Economic Capital (Age 15)

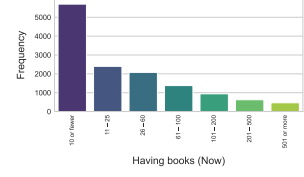

(c) Current Books

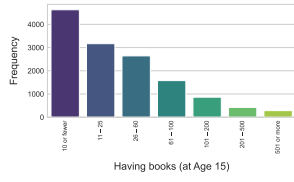

(d) Books at Age 15

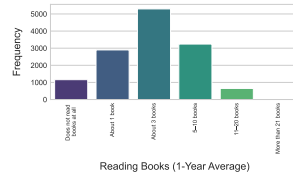

(e) Annual Reading Volume

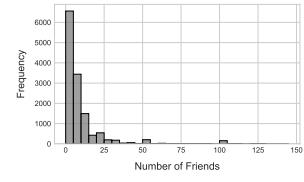

(f) Number of Friends

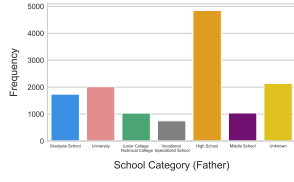

(g) Father's Education

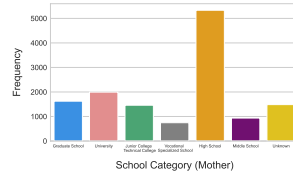

(h) Mother's Education

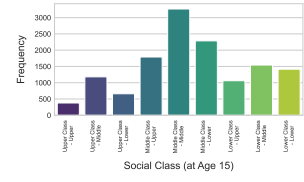

(i) Social Class (Age 15)

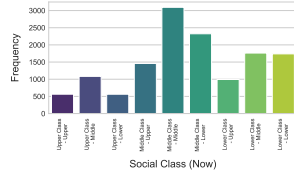

(j) Current Social Class

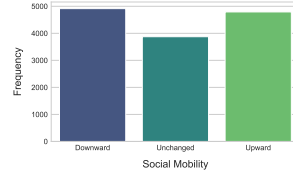

(k) Social Mobility

**Fig. S6:** Distributions of demographic and political attributes in the Japanese sample.

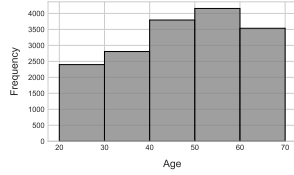

(a) Age

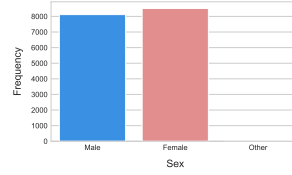

(b) Sex

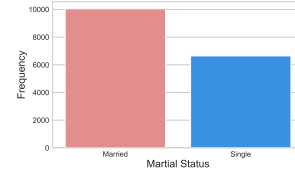

(c) Marital Status

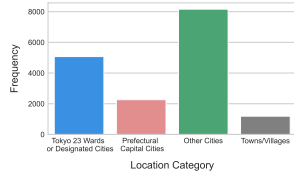

(d) Location

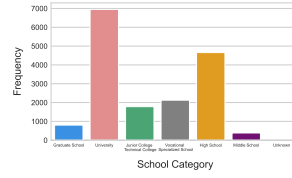

(e) Education

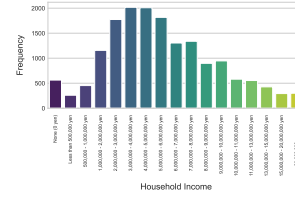

(f) Household Income

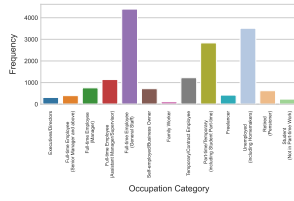

(g) Employment Status

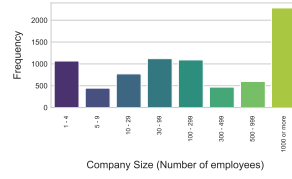

(h) Company Size

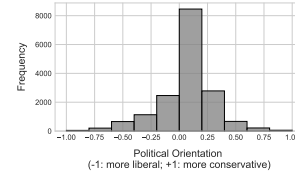

(i) Political Polarization

**Fig. S7:** Distributions of trust, religiosity, and media usage in the Japanese sample.

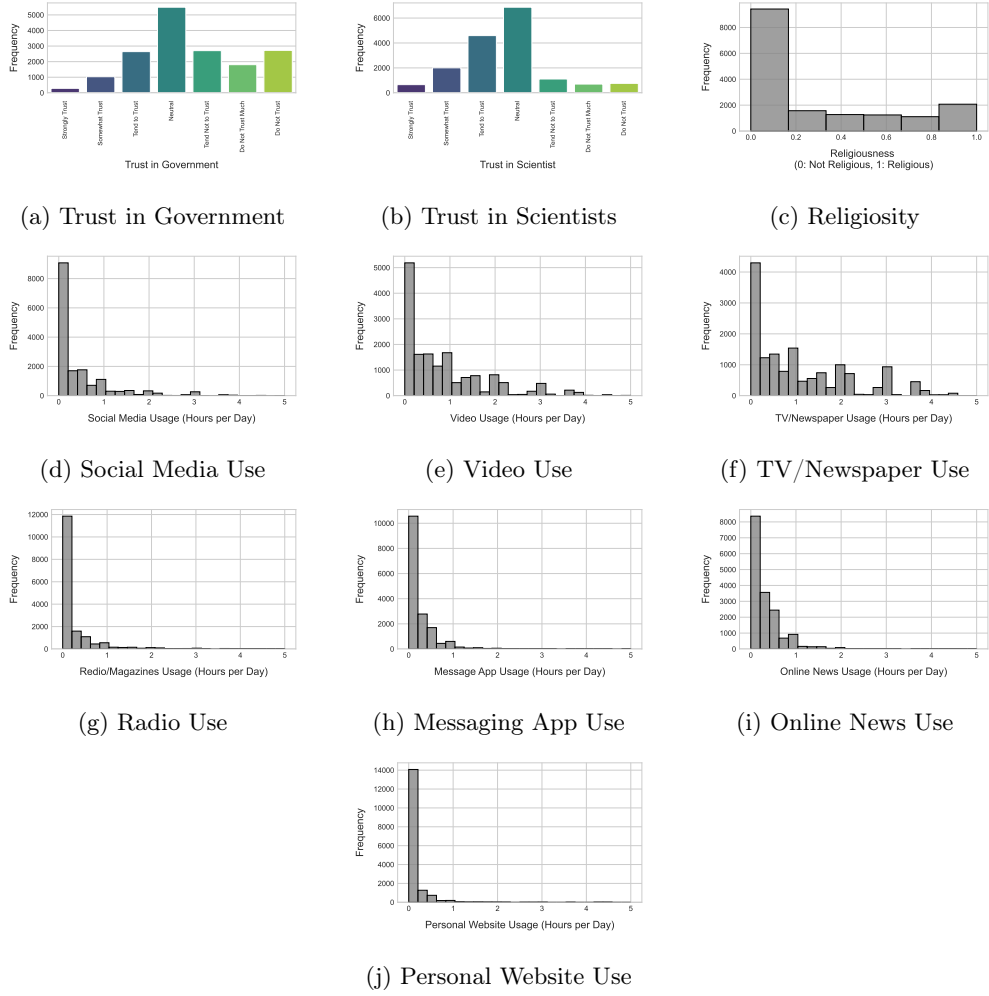

**Fig. S8:** Distributions of social capital attributes in the Japanese sample.

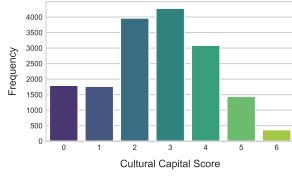

(a) Cultural Capital (Age 15)

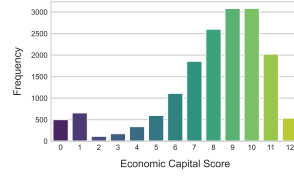

(b) Economic Capital (Age 15)

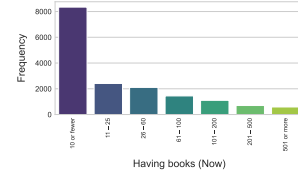

(c) Current Books

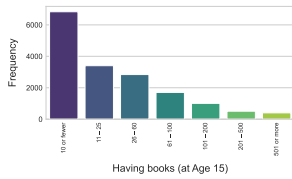

(d) Books at Age 15

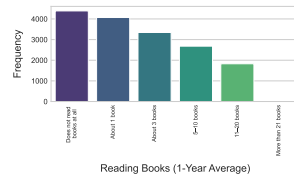

(e) Annual Reading Volume

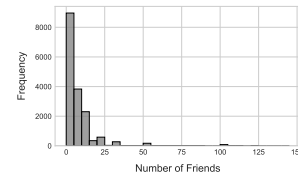

(f) Number of Friends

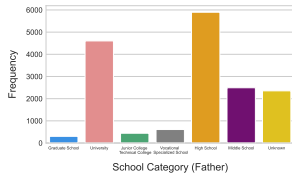

(g) Father's Education

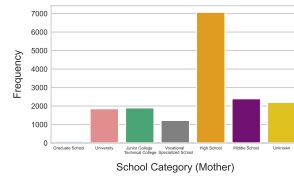

(h) Mother's Education

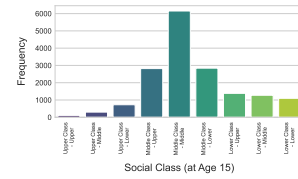

(i) Social Class (Age 15)

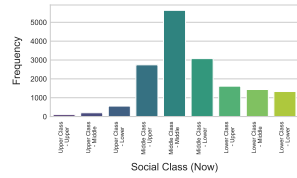

(j) Current Social Class

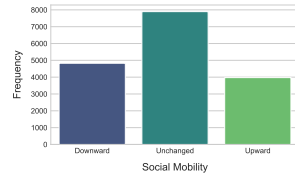

(k) Social Mobility

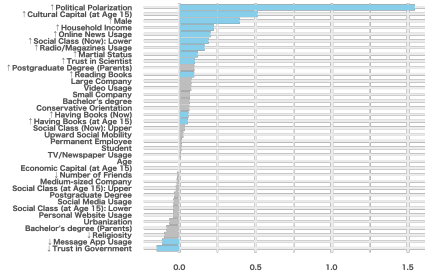

(a) Effects of explanatory variables on conspiracy theory **Recognition** of U.consp1

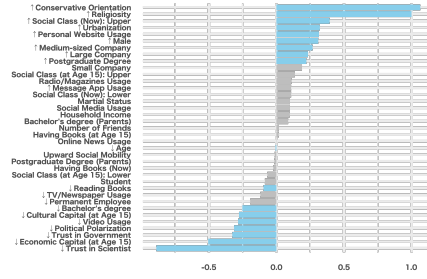

(b) Effects of explanatory variables on conspiracy theory **Belief** of U.consp1

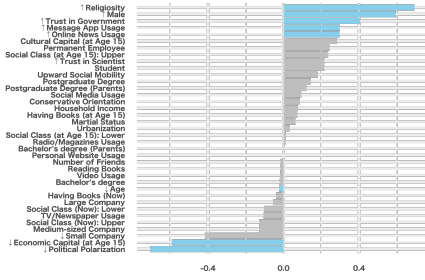

(c) Effects of explanatory variables on conspiracy theory **Demonstrative Action** of U.consp1

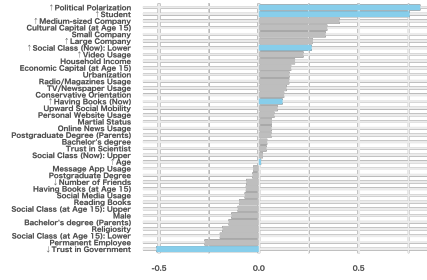

(d) Effects of explanatory variables on conspiracy theory **Diffusion Action** of U.consp1

**Fig. S9:** Effects of explanatory variables on conspiracy theory engagement for U.consp1 (Recognition, Belief, Demonstrative Action, and Diffusion Action) in the U.S.



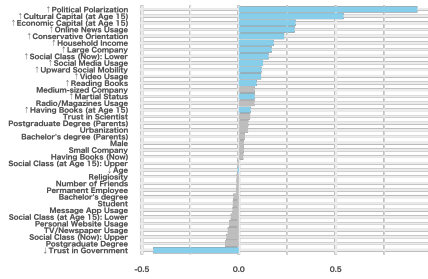

(a) Effects of explanatory variables on conspiracy theory **Recognition** of U.consp2

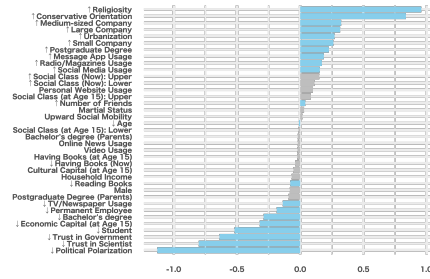

(b) Effects of explanatory variables on conspiracy theory **Belief** of U.consp2

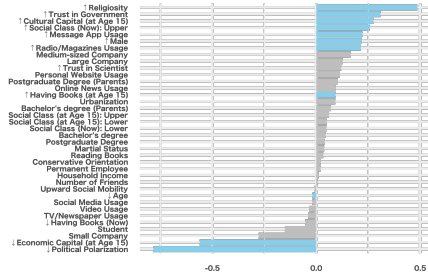

(c) Effects of explanatory variables on conspiracy theory **Demonstrative Action** of U.consp2

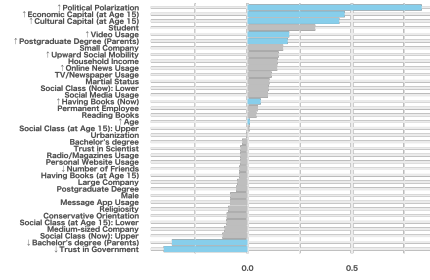

(d) Effects of explanatory variables on conspiracy theory **Diffusion Action** of U.consp2

**Fig. S10:** Effects of explanatory variables on conspiracy theory engagement for U.consp2 (Recognition, Belief, Demonstrative Action, and Diffusion Action) in the U.S.

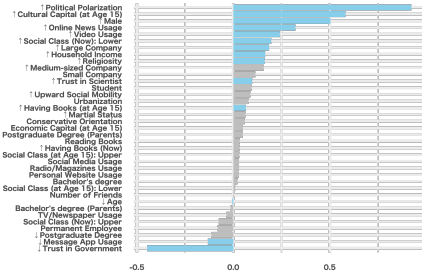

(a) Effects of explanatory variables on conspiracy theory **Recognition** of U.consp3

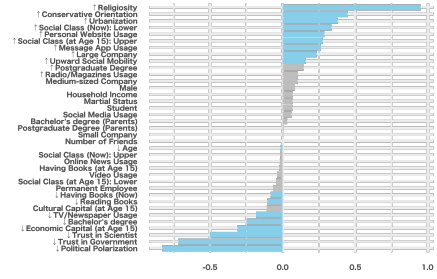

(b) Effects of explanatory variables on conspiracy theory **Belief** of U.consp3

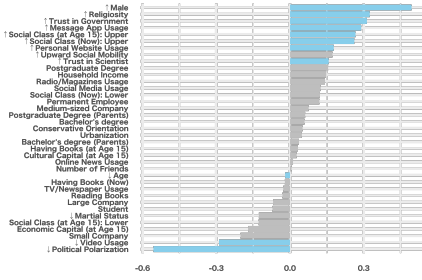

(c) Effects of explanatory variables on conspiracy theory **Demonstrative Action** of U.consp3

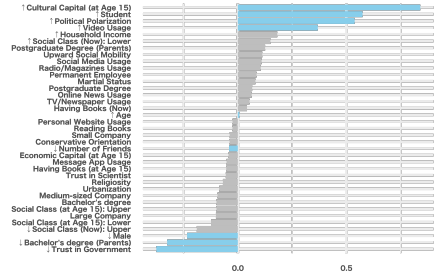

(d) Effects of explanatory variables on conspiracy theory **Diffusion Action** of U.consp3

**Fig. S11:** Effects of explanatory variables on conspiracy theory engagement for U.consp3 (Recognition, Belief, Demonstrative Action, and Diffusion Action) in the U.S.

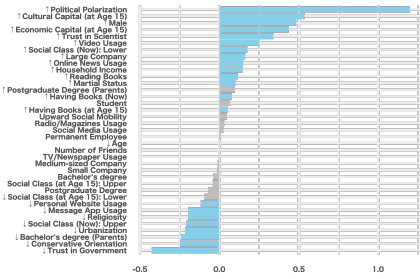

(a) Effects of explanatory variables on conspiracy theory **Recognition** of U.consp4

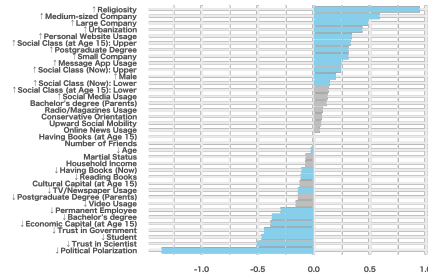

(b) Effects of explanatory variables on conspiracy theory **Belief** of U.consp4

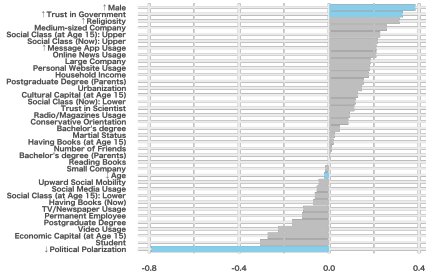

(c) Effects of explanatory variables on conspiracy theory **Demonstrative Action** of U.consp4

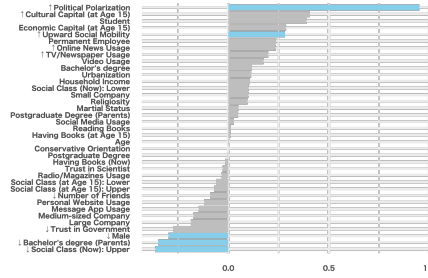

(d) Effects of explanatory variables on conspiracy theory **Diffusion Action** of U.consp4

**Fig. S12:** Effects of explanatory variables on conspiracy theory engagement for U.consp4 (Recognition, Belief, Demonstrative Action, and Diffusion Action) in the U.S.

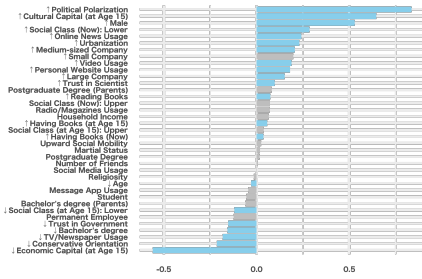

(a) Effects of explanatory variables on conspiracy theory **Recognition** of U.consp5

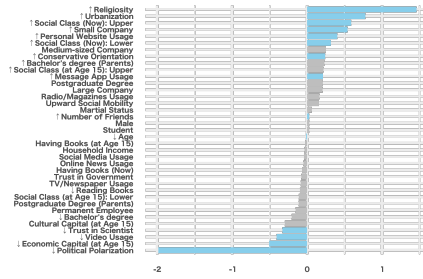

(b) Effects of explanatory variables on conspiracy theory **Belief** of U.consp5

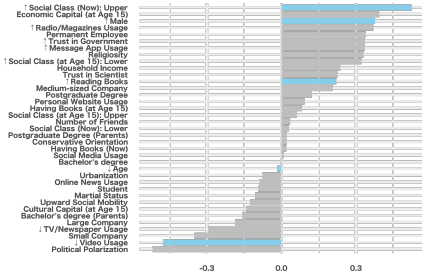

(c) Effects of explanatory variables on conspiracy theory **Demonstrative Action** of U.consp5

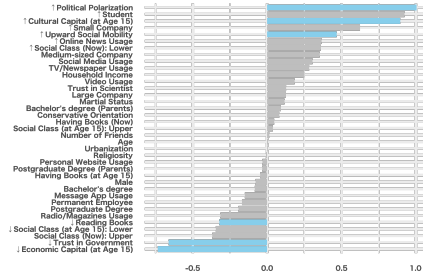

(d) Effects of explanatory variables on conspiracy theory **Diffusion Action** of U.consp5

**Fig. S13:** Effects of explanatory variables on conspiracy theory engagement for U.consp5 (Recognition, Belief, Demonstrative Action, and Diffusion Action) in the U.S.

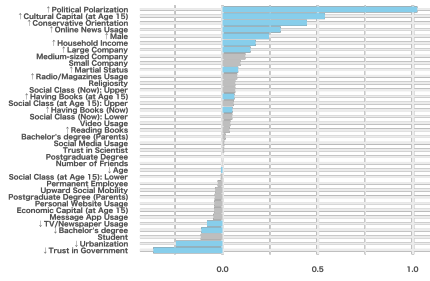

(a) Effects of explanatory variables on conspiracy theory **Recognition** of U.consp6

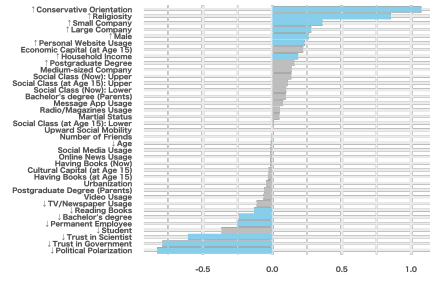

(b) Effects of explanatory variables on conspiracy theory **Belief** of U.consp6

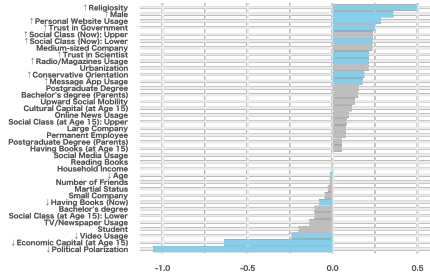

(c) Effects of explanatory variables on conspiracy theory **Demonstrative Action** of U.consp6

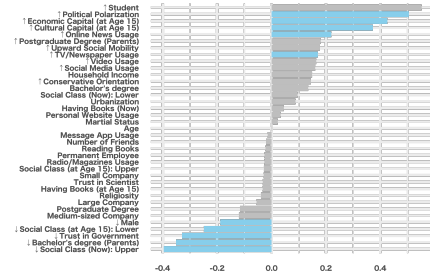

(d) Effects of explanatory variables on conspiracy theory **Diffusion Action** of U.consp6

**Fig. S14:** Effects of explanatory variables on conspiracy theory engagement for U.consp6 (Recognition, Belief, Demonstrative Action, and Diffusion Action) in the U.S.

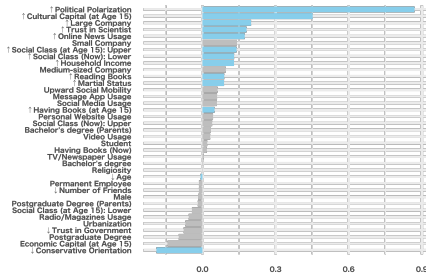

(a) Effects of explanatory variables on conspiracy theory **Recognition** of U.consp7

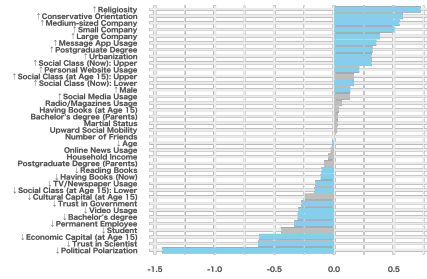

(b) Effects of explanatory variables on conspiracy theory **Belief** of U.consp7

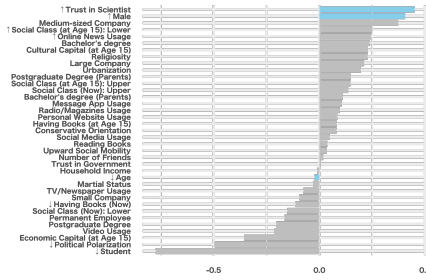

(c) Effects of explanatory variables on conspiracy theory **Demonstrative Action** of U.consp7

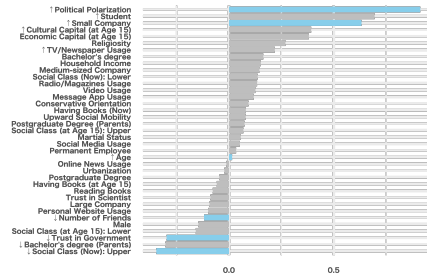

(d) Effects of explanatory variables on conspiracy theory **Diffusion Action** of U.consp7

**Fig. S15:** Effects of explanatory variables on conspiracy theory engagement for U.consp7 (Recognition, Belief, Demonstrative Action, and Diffusion Action) in the U.S.

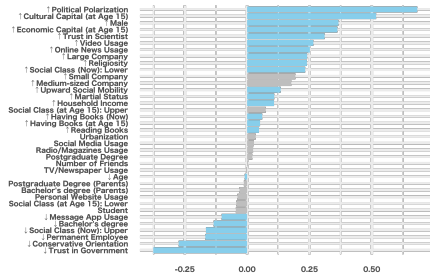

(a) Effects of explanatory variables on conspiracy theory **Recognition** of U.consp8

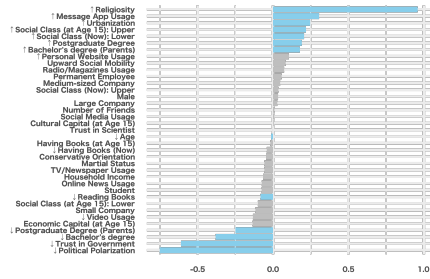

(b) Effects of explanatory variables on conspiracy theory **Belief** of U.consp8

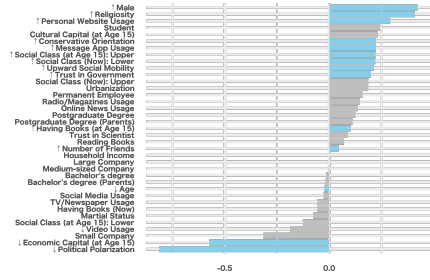

(c) Effects of explanatory variables on conspiracy theory **Demonstrative Action** of U.consp8

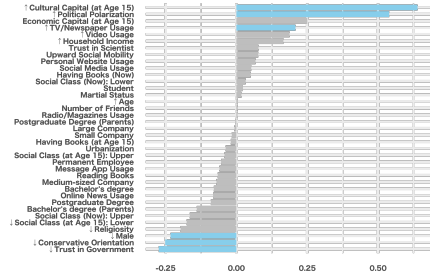

(d) Effects of explanatory variables on conspiracy theory **Diffusion Action** of U.consp8

**Fig. S16:** Effects of explanatory variables on conspiracy theory engagement for U.consp8 (Recognition, Belief, Demonstrative Action, and Diffusion Action) in the U.S.

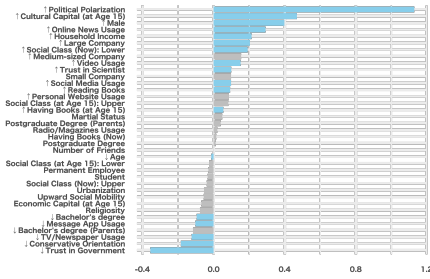

(a) Effects of explanatory variables on conspiracy theory **Recognition** of U.consp9

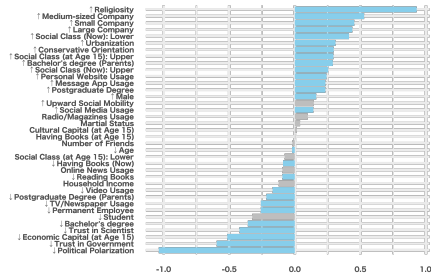

(b) Effects of explanatory variables on conspiracy theory **Belief** of U.consp9

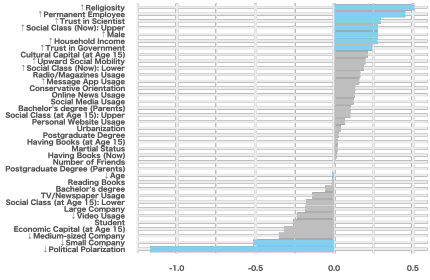

(c) Effects of explanatory variables on conspiracy theory **Demonstrative Action** of U.consp9

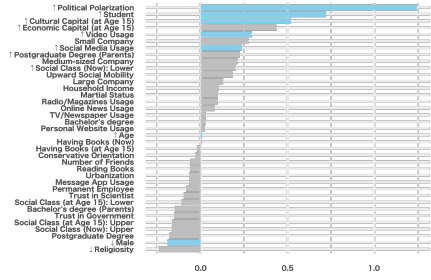

(d) Effects of explanatory variables on conspiracy theory **Diffusion Action** of U.consp9

**Fig. S17:** Effects of explanatory variables on conspiracy theory engagement for U.consp9 (Recognition, Belief, Demonstrative Action, and Diffusion Action) in the U.S.



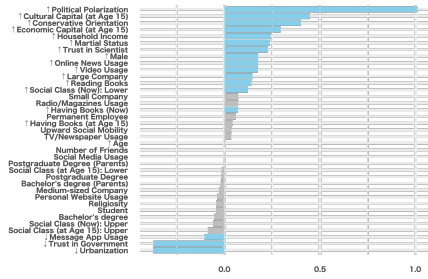

(a) Effects of explanatory variables on conspiracy theory **Recognition** of U.consp10

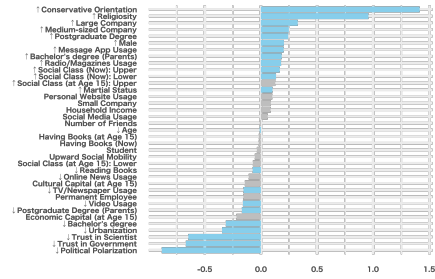

(b) Effects of explanatory variables on conspiracy theory **Belief** of U.consp10

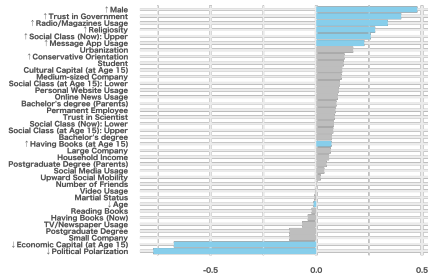

(c) Effects of explanatory variables on conspiracy theory **Demonstrative Action** of U.consp10

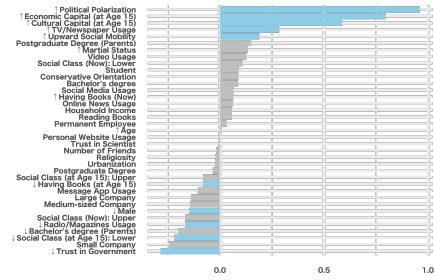

(d) Effects of explanatory variables on conspiracy theory **Diffusion Action** of U.consp10

**Fig. S18:** Effects of explanatory variables on conspiracy theory engagement for U.consp10 (Recognition, Belief, Demonstrative Action, and Diffusion Action) in the U.S.

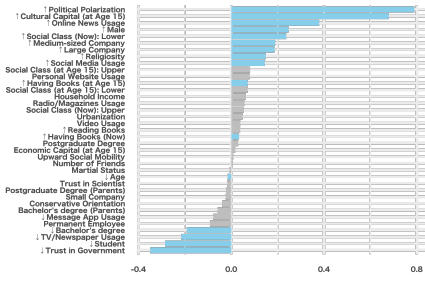

(a) Effects of explanatory variables on conspiracy theory **Recognition** of U.consp11

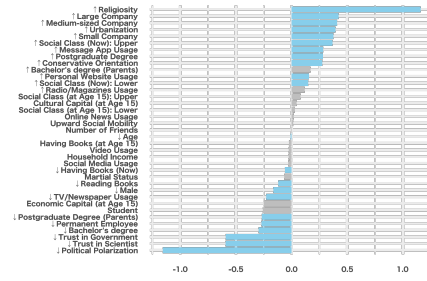

(b) Effects of explanatory variables on conspiracy theory **Belief** of U.consp11

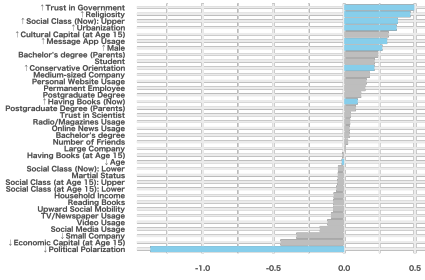

(c) Effects of explanatory variables on conspiracy theory **Demonstrative Action** of U.consp11

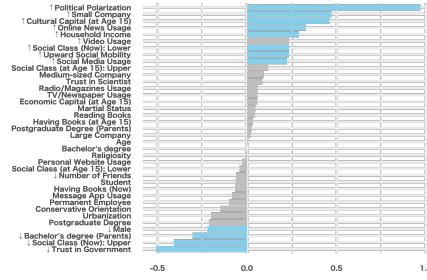

(d) Effects of explanatory variables on conspiracy theory **Diffusion Action** of U.consp11

**Fig. S19:** Effects of explanatory variables on conspiracy theory engagement for U.consp11 (Recognition, Belief, Demonstrative Action, and Diffusion Action) in the U.S.

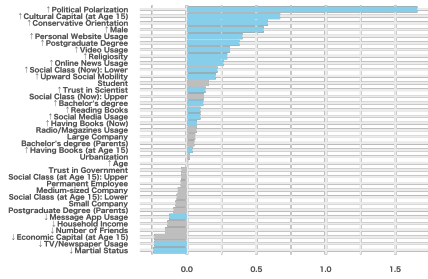

(a) Effects of explanatory variables on conspiracy theory **Recognition** of J.consp1

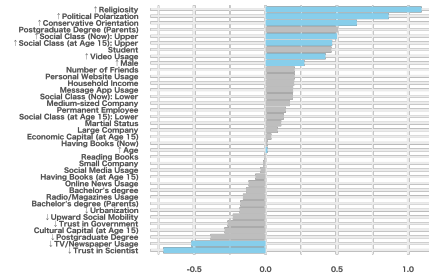

(b) Effects of explanatory variables on conspiracy theory **Belief** of J.consp1

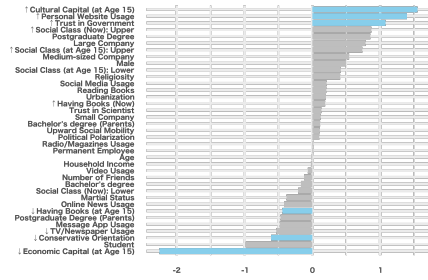

(c) Effects of explanatory variables on conspiracy theory **Demonstrative Action** of J.consp1

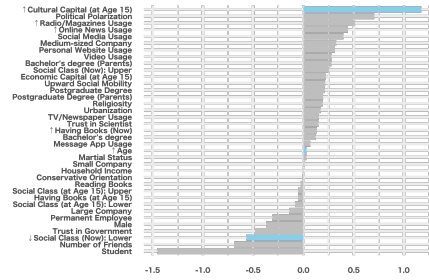

(d) Effects of explanatory variables on conspiracy theory **Diffusion Action** of J.consp1

**Fig. S20:** Effects of explanatory variables on conspiracy theory engagement for J.consp1 (Recognition, Belief, Demonstrative Action, and Diffusion Action) in the Japan

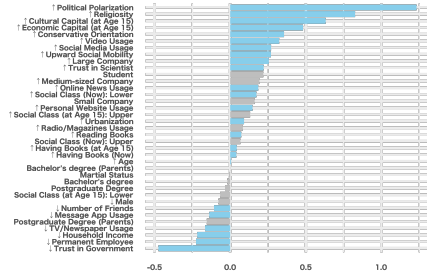

(a) Effects of explanatory variables on conspiracy theory **Recognition** of J.consp2

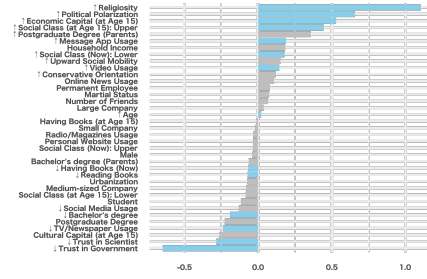

(b) Effects of explanatory variables on conspiracy theory **Belief** of J.consp2

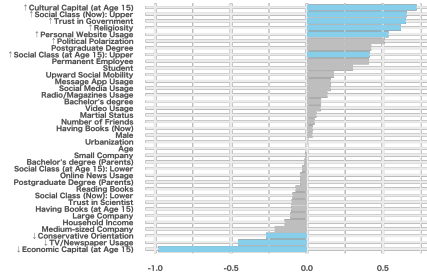

(c) Effects of explanatory variables on conspiracy theory **Demonstrative Action** of J.consp2

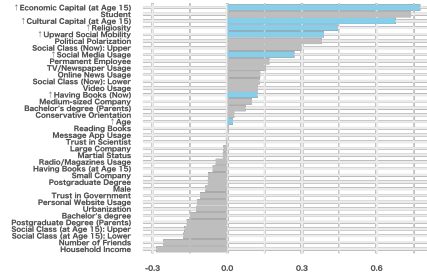

(d) Effects of explanatory variables on conspiracy theory **Diffusion Action** of J.consp2

**Fig. S21:** Effects of explanatory variables on conspiracy theory engagement for J.consp2 (Recognition, Belief, Demonstrative Action, and Diffusion Action) in the Japan

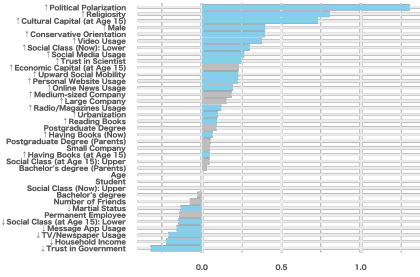

(a) Effects of explanatory variables on conspiracy theory **Recognition** of J.consp3

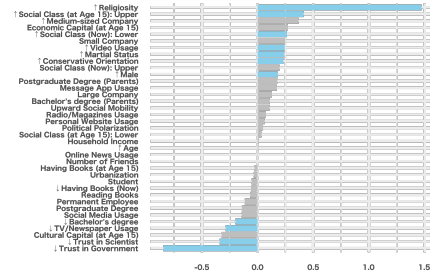

(b) Effects of explanatory variables on conspiracy theory **Belief** of J.consp3

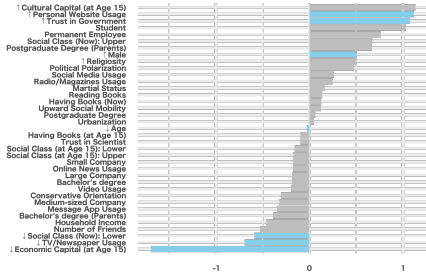

(c) Effects of explanatory variables on conspiracy theory **Demonstrative Action** of J.consp3

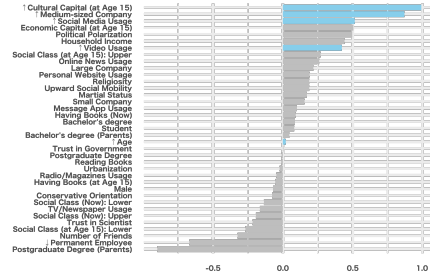

(d) Effects of explanatory variables on conspiracy theory **Diffusion Action** of J.consp3

**Fig. S22:** Effects of explanatory variables on conspiracy theory engagement for J.consp3 (Recognition, Belief, Demonstrative Action, and Diffusion Action) in the Japan

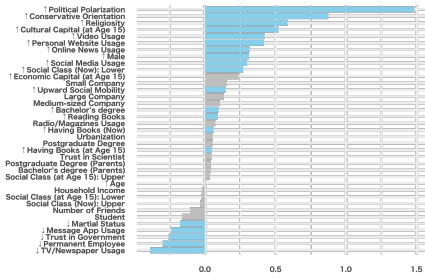

(a) Effects of explanatory variables on conspiracy theory **Recognition** of J.consp4

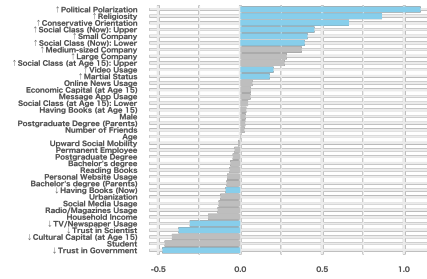

(b) Effects of explanatory variables on conspiracy theory **Belief** of J.consp4

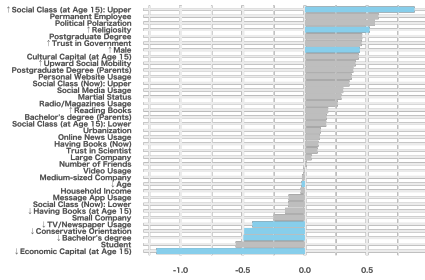

(c) Effects of explanatory variables on conspiracy theory **Demonstrative Action** of J.consp4

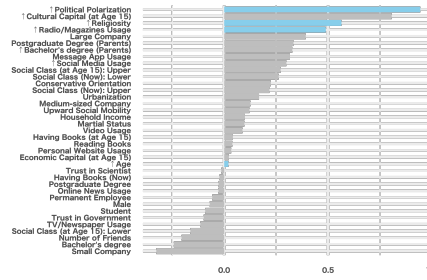

(d) Effects of explanatory variables on conspiracy theory **Diffusion Action** of J.consp4

**Fig. S23:** Effects of explanatory variables on conspiracy theory engagement for J.consp4 (Recognition, Belief, Demonstrative Action, and Diffusion Action) in the Japan

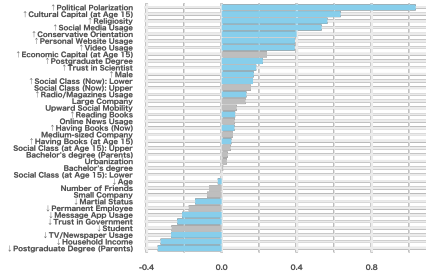

(a) Effects of explanatory variables on conspiracy theory **Recognition** of J.consp5

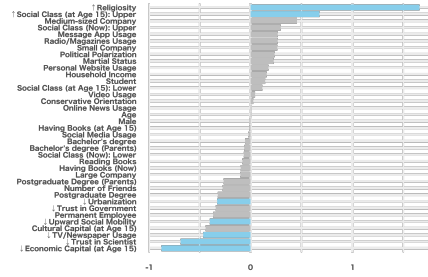

(b) Effects of explanatory variables on conspiracy theory **Belief** of J.consp5

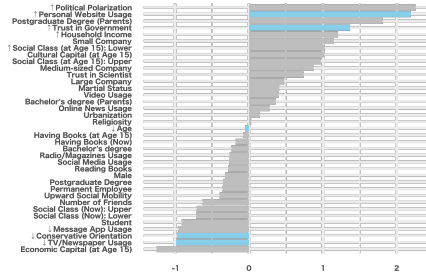

(c) Effects of explanatory variables on conspiracy theory **Demonstrative Action** of J.consp5

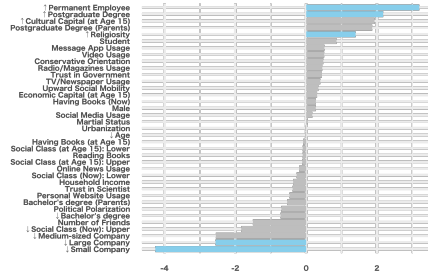

(d) Effects of explanatory variables on conspiracy theory **Diffusion Action** of J.consp5

**Fig. S24:** Effects of explanatory variables on conspiracy theory engagement for J.consp5 (Recognition, Belief, Demonstrative Action, and Diffusion Action) in the Japan

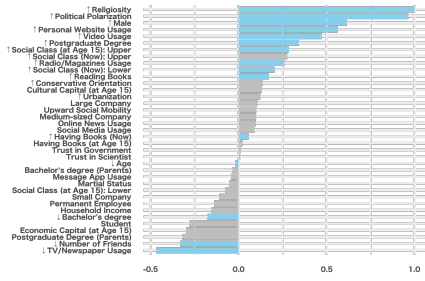

(a) Effects of explanatory variables on conspiracy theory **Recognition** of J.consp6

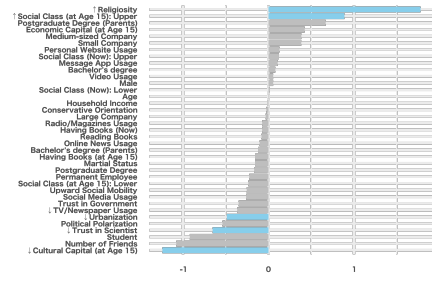

(b) Effects of explanatory variables on conspiracy theory **Belief** of J.consp6

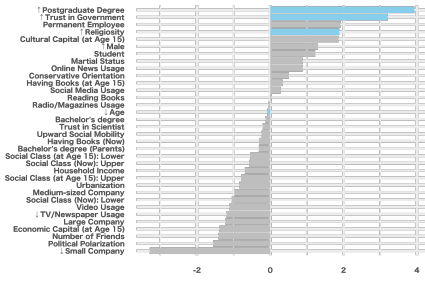

(c) Effects of explanatory variables on conspiracy theory **Demonstrative Action** of J.consp6

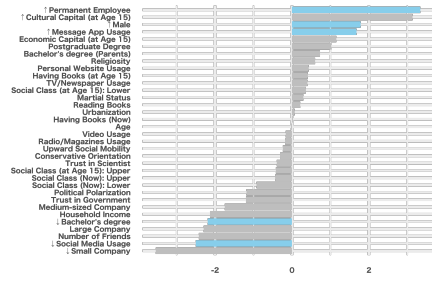

(d) Effects of explanatory variables on conspiracy theory **Diffusion Action** of J.consp6

**Fig. S25:** Effects of explanatory variables on conspiracy theory engagement for J.consp6 (Recognition, Belief, Demonstrative Action, and Diffusion Action) in the Japan



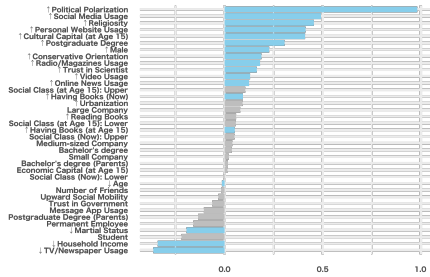

(a) Effects of explanatory variables on conspiracy theory **Recognition** of J.consp7

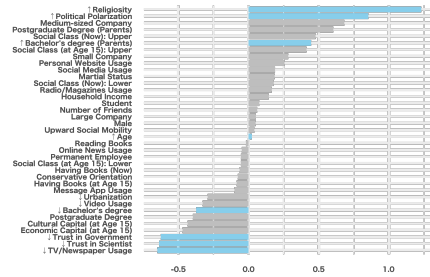

(b) Effects of explanatory variables on conspiracy theory **Belief** of J.consp7

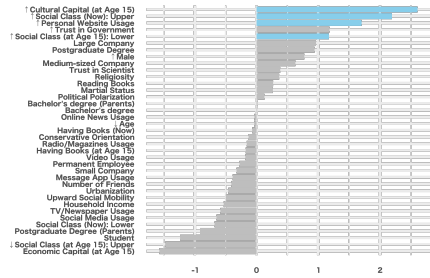

(c) Effects of explanatory variables on conspiracy theory **Demonstrative Action** of J.consp7

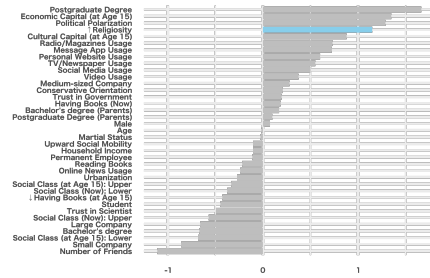

(d) Effects of explanatory variables on conspiracy theory **Diffusion Action** of J.consp7

**Fig. S26:** Effects of explanatory variables on conspiracy theory engagement for J.consp7 (Recognition, Belief, Demonstrative Action, and Diffusion Action) in the Japan

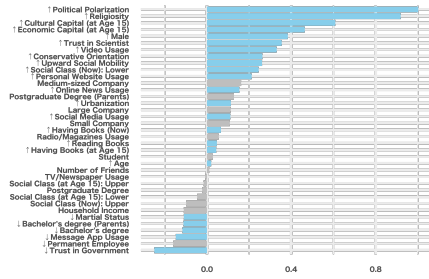

(a) Effects of explanatory variables on conspiracy theory **Recognition** of J.consp8

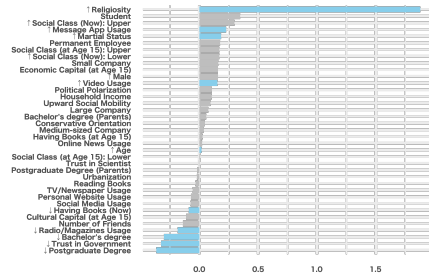

(b) Effects of explanatory variables on conspiracy theory **Belief** of J.consp8

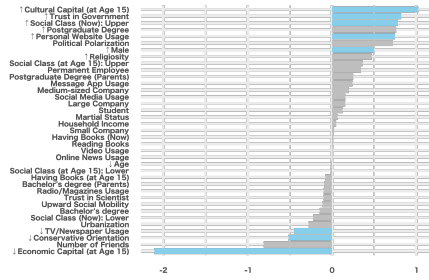

(c) Effects of explanatory variables on conspiracy theory **Demonstrative Action** of J.consp8

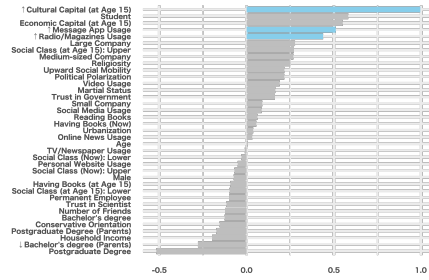

(d) Effects of explanatory variables on conspiracy theory **Diffusion Action** of J.consp8

**Fig. S27:** Effects of explanatory variables on conspiracy theory engagement for J.consp8 (Recognition, Belief, Demonstrative Action, and Diffusion Action) in the Japan

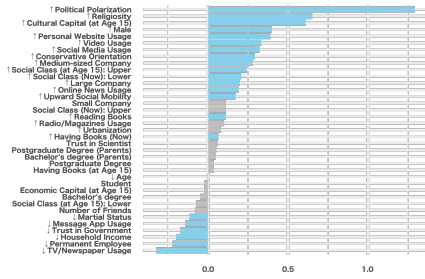

(a) Effects of explanatory variables on conspiracy theory **Recognition** of J.consp9

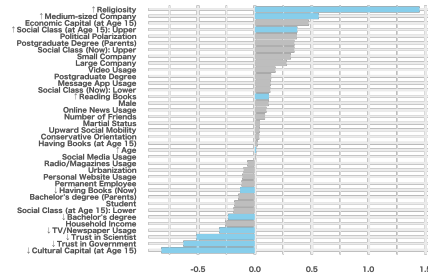

(b) Effects of explanatory variables on conspiracy theory **Belief** of J.consp9

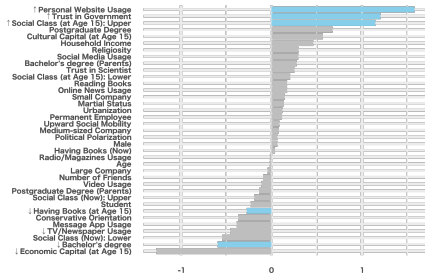

(c) Effects of explanatory variables on conspiracy theory **Demonstrative Action** of J.consp9

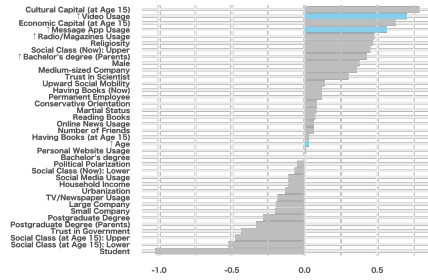

(d) Effects of explanatory variables on conspiracy theory **Diffusion Action** of J.consp9

**Fig. S28:** Effects of explanatory variables on conspiracy theory engagement for J.consp9 (Recognition, Belief, Demonstrative Action, and Diffusion Action) in the Japan

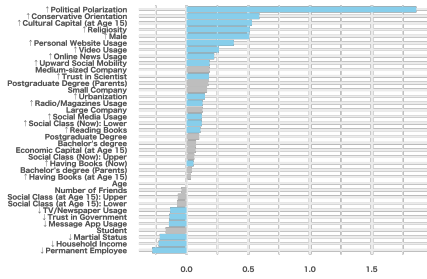

(a) Effects of explanatory variables on conspiracy theory **Recognition** of J.consp10

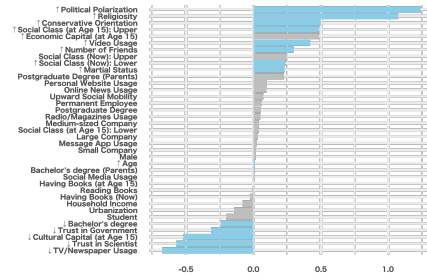

(b) Effects of explanatory variables on conspiracy theory **Belief** of J.consp10

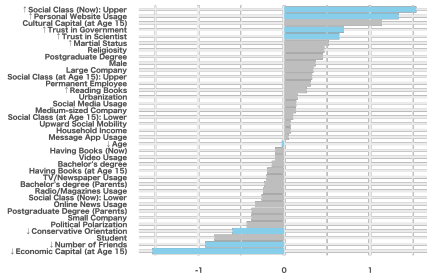

(c) Effects of explanatory variables on conspiracy theory **Demonstrative Action** of J.consp10

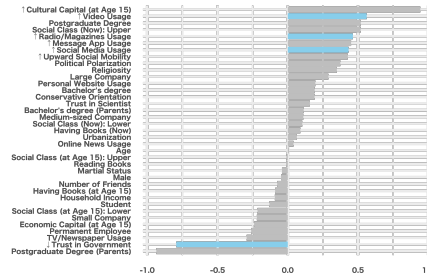

(d) Effects of explanatory variables on conspiracy theory **Diffusion Action** of J.consp10

**Fig. S29:** Effects of explanatory variables on conspiracy theory engagement for J.consp10 (Recognition, Belief, Demonstrative Action, and Diffusion Action) in the Japan

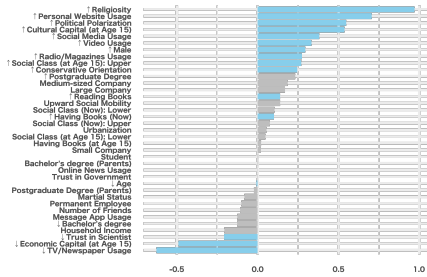

(a) Effects of explanatory variables on conspiracy theory **Recognition** of J.consp11

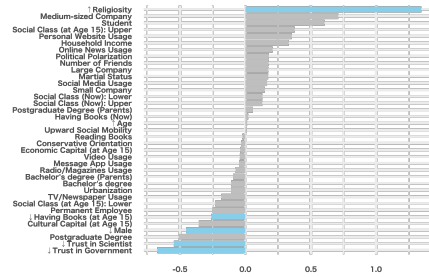

(b) Effects of explanatory variables on conspiracy theory **Belief** of J.consp11

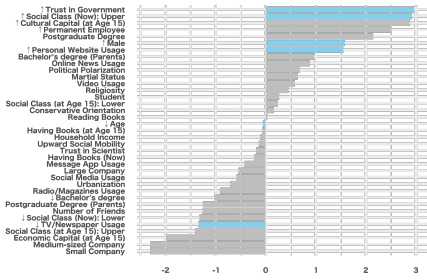

(c) Effects of explanatory variables on conspiracy theory **Demonstrative Action** of J.consp11

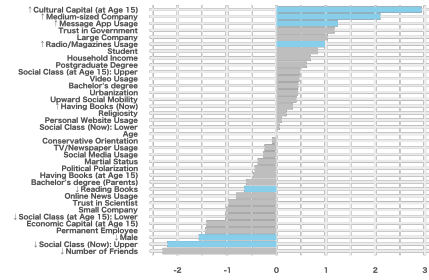

(d) Effects of explanatory variables on conspiracy theory **Diffusion Action** of J.consp11

**Fig. S30:** Effects of explanatory variables on conspiracy theory engagement for J.consp11 (Recognition, Belief, Demonstrative Action, and Diffusion Action) in the Japan

| Parameter                                    | Estimate | SE    | l95CI  | u95CI  | Rhat  | Bulk_ESS | Tail_ESS |
|----------------------------------------------|----------|-------|--------|--------|-------|----------|----------|
| ↑Recognition Intercept                       | 0.568    | 0.169 | 0.231  | 0.893  | 1.000 | 3576.245 | 3192.681 |
| ↓Recognition Age                             | -0.010   | 0.003 | -0.015 | -0.005 | 1.000 | 3314.355 | 3094.210 |
| ↑Recognition Male                            | 0.209    | 0.063 | 0.084  | 0.329  | 1.000 | 2816.409 | 2920.354 |
| Recognition Martial Status                   | 0.077    | 0.064 | -0.047 | 0.202  | 1.002 | 2482.106 | 2544.359 |
| Recognition Urbanization                     | -0.150   | 0.102 | -0.350 | 0.050  | 1.001 | 2732.452 | 2439.183 |
| ↓Recognition Bachelor's degree               | -0.223   | 0.078 | -0.376 | -0.070 | 1.002 | 2025.222 | 2669.524 |
| Recognition Postgraduate Degree              | 0.116    | 0.099 | -0.077 | 0.306  | 1.003 | 1925.445 | 3018.712 |
| ↑Recognition Household Income                | 0.180    | 0.089 | 0.012  | 0.359  | 1.002 | 2420.396 | 2410.745 |
| Recognition Student                          | -0.269   | 0.191 | -0.645 | 0.106  | 1.000 | 2361.834 | 2300.197 |
| Recognition Permanent Employee               | 0.130    | 0.130 | -0.130 | 0.381  | 1.009 | 773.978  | 992.227  |
| ↑Recognition Large Company                   | 0.190    | 0.113 | -0.026 | 0.423  | 1.007 | 770.807  | 1140.160 |
| Recognition Medium-sized Company             | -0.072   | 0.155 | -0.368 | 0.229  | 1.007 | 730.847  | 1127.701 |
| Recognition Small Company                    | -0.120   | 0.171 | -0.444 | 0.231  | 1.007 | 755.379  | 1068.614 |
| ↑Recognition Political Polarization          | 0.855    | 0.143 | 0.583  | 1.139  | 1.002 | 2847.015 | 2736.658 |
| ↑Recognition Conservative Orientation        | 0.363    | 0.066 | 0.239  | 0.493  | 1.002 | 2236.976 | 2414.628 |
| ↓Recognition Trust in Government             | -0.560   | 0.073 | -0.705 | -0.417 | 1.002 | 2337.023 | 2561.828 |
| ↑Recognition Trust in Scientist              | 0.460    | 0.073 | 0.319  | 0.607  | 1.001 | 2099.177 | 2461.371 |
| ↑Recognition Religiosity                     | 0.561    | 0.083 | 0.397  | 0.719  | 1.001 | 2590.370 | 2632.995 |
| Recognition Social Media Usage               | 0.039    | 0.069 | -0.098 | 0.175  | 1.000 | 2803.035 | 2992.640 |
| ↑Recognition Video Usage                     | 0.258    | 0.073 | 0.117  | 0.402  | 1.001 | 3039.727 | 3040.513 |
| Recognition TV/Newspaper Usage               | 0.001    | 0.069 | -0.137 | 0.136  | 1.001 | 2669.054 | 2581.651 |
| Recognition Radio/Magazines Usage            | 0.019    | 0.078 | -0.130 | 0.173  | 1.000 | 2547.790 | 2719.361 |
| ↑Recognition Online News Usage               | 0.306    | 0.079 | 0.148  | 0.462  | 1.002 | 2198.847 | 2271.952 |
| Recognition Message App Usage                | -0.048   | 0.069 | -0.183 | 0.086  | 1.000 | 2329.912 | 2827.424 |
| Recognition Personal Website Usage           | 0.017    | 0.084 | -0.149 | 0.182  | 1.002 | 2312.752 | 2394.367 |
| ↑Recognition Cultural Capital (at Age 15)    | 0.798    | 0.139 | 0.534  | 1.075  | 1.001 | 2329.794 | 2661.557 |
| Recognition Economic Capital (at Age 15)     | 0.213    | 0.153 | -0.081 | 0.521  | 1.002 | 2226.210 | 2642.665 |
| ↑Recognition Having Books (at Age 15)        | 0.069    | 0.036 | 0.002  | 0.141  | 1.001 | 3252.110 | 3023.272 |
| Recognition Having Books (Now)               | 0.018    | 0.030 | -0.040 | 0.078  | 1.002 | 2229.153 | 2901.500 |
| ↑Recognition Reading Books                   | 0.103    | 0.039 | 0.028  | 0.179  | 1.001 | 2123.963 | 2800.791 |
| Recognition Number of Friends                | -0.003   | 0.008 | -0.017 | 0.014  | 1.000 | 3416.697 | 2297.781 |
| Recognition Bachelor's degree (Parents)      | -0.040   | 0.104 | -0.241 | 0.171  | 1.004 | 1419.185 | 2006.519 |
| Recognition Postgraduate Degree (Parents)    | 0.079    | 0.087 | -0.096 | 0.242  | 1.002 | 1588.734 | 2399.570 |
| Recognition Social Class (Now): Upper        | -0.089   | 0.097 | -0.278 | 0.102  | 1.001 | 2034.591 | 2812.190 |
| ↑Recognition Social Class (Now): Lower       | 0.379    | 0.080 | 0.224  | 0.541  | 1.007 | 1638.249 | 2302.957 |
| Recognition Social Class (at Age 15): Upper  | 0.026    | 0.097 | -0.172 | 0.211  | 1.000 | 2103.621 | 2622.455 |
| ↓Recognition Social Class (at Age 15): Lower | -0.268   | 0.078 | -0.422 | -0.112 | 1.003 | 1962.358 | 2279.366 |
| ↑Recognition Upward Social Mobility          | 0.420    | 0.079 | 0.267  | 0.577  | 1.003 | 1944.309 | 2160.081 |

**Table S7:** Parameter Estimates for Recognition in the U.S. This table presents the Bayesian estimation results for each parameter. The Parameter column indicates the variable name, Estimate shows the median of the posterior distribution (Posterior Median), SE is the standard error, and l95CI and u95CI indicate the lower and upper bounds of the 95% credible interval. Rhat is the convergence diagnostic, with values close to 1 indicating good convergence. Bulk\_ESS and Tail\_ESS represent the effective sample size for bulk and tail portions of the posterior distribution. Furthermore, parameters marked with ↑ indicate significant positive effects ( $P(\beta > 0) > 0.95$ ), while ↓ indicates significant negative effects ( $P(\beta < 0) > 0.95$ ).

| Parameter                               | Estimate | SE     | l95CI   | u95CI  | Rhat  | Bulk_ESS | Tail_ESS |
|-----------------------------------------|----------|--------|---------|--------|-------|----------|----------|
| ↓Belief Intercept                       | -32.917  | 21.866 | -90.820 | -8.740 | 1.005 | 929.096  | 830.963  |
| ↑Belief Recognition                     | 33.904   | 21.863 | 9.772   | 91.763 | 1.005 | 930.631  | 830.963  |
| ↓Belief Age                             | -0.025   | 0.002  | -0.029  | -0.021 | 1.001 | 4000.815 | 3545.915 |
| ↑Belief Male                            | 0.155    | 0.047  | 0.061   | 0.247  | 1.001 | 2788.198 | 2268.128 |
| ↑Belief Martial Status                  | 0.121    | 0.047  | 0.029   | 0.215  | 1.001 | 3001.442 | 2704.731 |
| ↑Belief Urbanization                    | 0.180    | 0.078  | 0.025   | 0.334  | 1.000 | 2552.435 | 2975.930 |
| ↓Belief Bachelor's degree               | -0.331   | 0.058  | -0.443  | -0.217 | 1.001 | 2328.044 | 2507.574 |
| Belief Postgraduate Degree              | 0.112    | 0.074  | -0.030  | 0.259  | 1.001 | 2367.940 | 2662.345 |
| Belief Household Income                 | -0.011   | 0.065  | -0.134  | 0.112  | 1.002 | 2672.614 | 2724.295 |
| ↓Belief Student                         | -0.306   | 0.157  | -0.622  | -0.005 | 1.003 | 2975.414 | 2586.989 |
| ↓Belief Permanent Employee              | -0.193   | 0.096  | -0.382  | -0.008 | 1.003 | 745.641  | 1568.548 |
| ↑Belief Large Company                   | 0.466    | 0.089  | 0.292   | 0.640  | 1.003 | 802.526  | 1432.249 |
| ↑Belief Medium-sized Company            | 0.391    | 0.116  | 0.161   | 0.619  | 1.003 | 750.233  | 1357.105 |
| ↑Belief Small Company                   | 0.216    | 0.129  | -0.027  | 0.474  | 1.003 | 861.035  | 1671.914 |
| ↓Belief Political Polarization          | -0.739   | 0.097  | -0.924  | -0.546 | 1.001 | 2216.792 | 2875.328 |
| ↑Belief Conservative Orientation        | 0.945    | 0.053  | 0.844   | 1.046  | 1.001 | 2729.449 | 2629.283 |
| ↓Belief Trust in Government             | -0.828   | 0.051  | -0.929  | -0.728 | 1.001 | 2119.274 | 2614.281 |
| ↓Belief Trust in Scientist              | -0.379   | 0.055  | -0.486  | -0.272 | 1.001 | 1870.494 | 2189.879 |
| ↑Belief Religiosity                     | 1.135    | 0.067  | 1.004   | 1.263  | 1.002 | 2542.787 | 2672.448 |
| ↑Belief Social Media Usage              | 0.132    | 0.052  | 0.026   | 0.233  | 1.000 | 2359.275 | 2616.645 |
| Belief Video Usage                      | 0.031    | 0.063  | -0.093  | 0.155  | 1.001 | 2244.997 | 2170.012 |
| ↓Belief TV/Newspaper Usage              | -0.177   | 0.051  | -0.275  | -0.077 | 1.000 | 2447.952 | 2728.990 |
| ↑Belief Radio/Magazines Usage           | 0.174    | 0.056  | 0.068   | 0.286  | 1.000 | 2204.615 | 2383.052 |
| Belief Online News Usage                | 0.017    | 0.054  | -0.088  | 0.120  | 1.001 | 2566.896 | 2864.649 |
| ↑Belief Message App Usage               | 0.235    | 0.052  | 0.135   | 0.339  | 1.000 | 2261.568 | 2338.790 |
| ↑Belief Personal Website Usage          | 0.183    | 0.064  | 0.060   | 0.310  | 1.000 | 2476.272 | 2542.034 |
| Belief Cultural Capital (at Age 15)     | -0.079   | 0.102  | -0.278  | 0.118  | 1.000 | 2532.132 | 2971.576 |
| ↓Belief Economic Capital (at Age 15)    | -0.272   | 0.133  | -0.530  | -0.012 | 1.001 | 2009.132 | 2446.036 |
| Belief Having Books (at Age 15)         | -0.028   | 0.023  | -0.074  | 0.017  | 1.001 | 2798.878 | 2597.851 |
| Belief Having Books (Now)               | -0.024   | 0.020  | -0.063  | 0.016  | 1.002 | 2140.185 | 2371.698 |
| ↓Belief Reading Books                   | -0.100   | 0.027  | -0.151  | -0.047 | 1.001 | 2441.622 | 2770.011 |
| ↑Belief Number of Friends               | 0.039    | 0.026  | 0.000   | 0.098  | 1.001 | 2787.716 | 2319.929 |
| ↑Belief Bachelor's degree (Parents)     | 0.166    | 0.075  | 0.020   | 0.311  | 1.001 | 1866.835 | 2524.409 |
| ↓Belief Postgraduate Degree (Parents)   | -0.118   | 0.061  | -0.238  | 0.000  | 1.001 | 2076.854 | 2363.992 |
| ↑Belief Social Class (Now): Upper       | 0.158    | 0.076  | 0.008   | 0.304  | 1.001 | 2210.637 | 2833.652 |
| ↑Belief Social Class (Now): Lower       | 0.266    | 0.059  | 0.149   | 0.380  | 1.003 | 1884.023 | 2478.839 |
| ↑Belief Social Class (at Age 15): Upper | 0.214    | 0.073  | 0.074   | 0.361  | 1.000 | 2406.881 | 2383.286 |
| ↓Belief Social Class (at Age 15): Lower | -0.103   | 0.061  | -0.221  | 0.019  | 1.001 | 1994.292 | 2363.382 |
| ↑Belief Upward Social Mobility          | 0.147    | 0.061  | 0.028   | 0.266  | 1.004 | 1676.784 | 2295.280 |

**Table S8:** Parameter Estimates for Belief in the U.S. This table presents the Bayesian estimation results for each parameter. The Parameter column indicates the variable name, Estimate shows the median of the posterior distribution (Posterior Median), SE is the standard error, and l95CI and u95CI indicate the lower and upper bounds of the 95% credible interval. Rhat is the convergence diagnostic, with values close to 1 indicating good convergence. Bulk\_ESS and Tail\_ESS represent the effective sample size for bulk and tail portions of the posterior distribution. Furthermore, parameters marked with ↑ indicate significant positive effects ( $P(\beta > 0) > 0.95$ ), while ↓ indicates significant negative effects ( $P(\beta < 0) > 0.95$ ).

| Parameter                                      | Estimate | SE    | l95CI   | u95CI  | Rhat  | Bulk_ESS | Tail_ESS |
|------------------------------------------------|----------|-------|---------|--------|-------|----------|----------|
| ↓Demonstrative Intercept                       | -16.142  | 8.362 | -38.207 | -8.337 | 1.007 | 811.448  | 503.903  |
| ↑Demonstrative Belief                          | 16.164   | 8.361 | 8.387   | 38.245 | 1.007 | 816.043  | 506.584  |
| ↓Demonstrative Age                             | -0.020   | 0.002 | -0.024  | -0.016 | 1.000 | 4155.574 | 3220.119 |
| ↑Demonstrative Male                            | 0.387    | 0.051 | 0.291   | 0.491  | 1.002 | 2172.517 | 2499.730 |
| Demonstrative Martial Status                   | 0.054    | 0.051 | -0.047  | 0.154  | 1.001 | 2442.034 | 2775.139 |
| ↑Demonstrative Urbanization                    | 0.192    | 0.083 | 0.029   | 0.357  | 1.003 | 3013.215 | 2740.929 |
| Demonstrative Bachelor's degree                | 0.050    | 0.063 | -0.072  | 0.176  | 1.001 | 2440.954 | 2618.358 |
| Demonstrative Postgraduate Degree              | 0.032    | 0.085 | -0.138  | 0.193  | 1.001 | 2413.705 | 2766.460 |
| Demonstrative Household Income                 | 0.048    | 0.070 | -0.092  | 0.186  | 1.003 | 2206.891 | 2526.496 |
| Demonstrative Student                          | -0.023   | 0.174 | -0.369  | 0.310  | 1.001 | 2512.635 | 2793.957 |
| Demonstrative Permanent Employee               | 0.004    | 0.089 | -0.167  | 0.179  | 1.004 | 1316.580 | 2008.275 |
| ↑Demonstrative Large Company                   | 0.148    | 0.081 | -0.012  | 0.305  | 1.003 | 1315.901 | 1677.984 |
| ↑Demonstrative Medium-sized Company            | 0.293    | 0.110 | 0.076   | 0.504  | 1.003 | 1256.087 | 1603.771 |
| Demonstrative Small Company                    | -0.139   | 0.126 | -0.389  | 0.107  | 1.004 | 1353.383 | 1685.308 |
| ↓Demonstrative Political Polarization          | -0.995   | 0.115 | -1.232  | -0.772 | 1.001 | 2957.784 | 2679.693 |
| ↓Demonstrative Conservative Orientation        | 0.218    | 0.053 | 0.114   | 0.320  | 1.000 | 2394.665 | 2625.973 |
| ↑Demonstrative Trust in Government             | 0.197    | 0.061 | 0.078   | 0.316  | 1.001 | 2493.631 | 2579.887 |
| Demonstrative Trust in Scientist               | 0.044    | 0.052 | -0.058  | 0.144  | 1.001 | 2476.635 | 2925.406 |
| ↑Demonstrative Religiosity                     | 0.504    | 0.079 | 0.351   | 0.655  | 1.002 | 2490.258 | 2947.654 |
| Demonstrative Social Media Usage               | 0.012    | 0.057 | -0.101  | 0.127  | 1.001 | 2470.592 | 2853.165 |
| ↓Demonstrative Video Usage                     | -0.140   | 0.069 | -0.272  | -0.005 | 1.000 | 2544.065 | 2673.724 |
| Demonstrative TV/Newspaper Usage               | -0.062   | 0.055 | -0.171  | 0.046  | 1.000 | 2534.084 | 2659.234 |
| ↑Demonstrative Radio/Magazines Usage           | 0.144    | 0.060 | 0.020   | 0.260  | 1.001 | 1996.083 | 2682.203 |
| ↑Demonstrative Online News Usage               | 0.138    | 0.057 | 0.028   | 0.248  | 1.000 | 2399.862 | 2810.976 |
| ↑Demonstrative Message App Usage               | 0.351    | 0.053 | 0.246   | 0.455  | 1.002 | 1991.056 | 2525.252 |
| ↑Demonstrative Personal Website Usage          | 0.185    | 0.062 | 0.065   | 0.308  | 1.001 | 2784.401 | 2542.935 |
| ↑Demonstrative Cultural Capital (at Age 15)    | 0.301    | 0.107 | 0.088   | 0.515  | 1.000 | 2051.427 | 2448.080 |
| ↓Demonstrative Economic Capital (at Age 15)    | -0.972   | 0.140 | -1.244  | -0.691 | 1.000 | 2121.927 | 2888.410 |
| ↑Demonstrative Having Books (at Age 15)        | 0.083    | 0.025 | 0.034   | 0.132  | 1.000 | 2557.351 | 2680.038 |
| Demonstrative Having Books (Now)               | -0.034   | 0.024 | -0.081  | 0.011  | 1.001 | 2426.391 | 2525.753 |
| Demonstrative Reading Books                    | -0.013   | 0.031 | -0.074  | 0.048  | 1.000 | 2427.776 | 2683.342 |
| Demonstrative Number of Friends                | 0.010    | 0.010 | -0.006  | 0.034  | 1.002 | 2866.350 | 1489.997 |
| Demonstrative Bachelor's degree (Parents)      | 0.050    | 0.082 | -0.111  | 0.211  | 1.003 | 1783.703 | 2479.966 |
| Demonstrative Postgraduate Degree (Parents)    | 0.069    | 0.066 | -0.066  | 0.199  | 1.006 | 1700.083 | 2236.733 |
| ↑Demonstrative Social Class (Now): Upper       | 0.259    | 0.082 | 0.100   | 0.420  | 1.000 | 1871.016 | 2404.066 |
| ↑Demonstrative Social Class (Now): Lower       | 0.144    | 0.062 | 0.019   | 0.263  | 1.001 | 1808.833 | 2585.225 |
| ↑Demonstrative Social Class (at Age 15): Upper | 0.260    | 0.076 | 0.112   | 0.416  | 1.002 | 1927.394 | 2519.637 |
| ↓Demonstrative Social Class (at Age 15): Lower | -0.134   | 0.062 | -0.257  | -0.013 | 1.002 | 1757.297 | 2697.573 |
| ↑Demonstrative Upward Social Mobility          | 0.194    | 0.066 | 0.064   | 0.324  | 1.001 | 1675.502 | 2224.236 |

**Table S9:** Parameter Estimates for Demonstrative Action in the U.S. This table presents the Bayesian estimation results for each parameter. The Parameter column indicates the variable name, Estimate shows the median of the posterior distribution (Posterior Median), SE is the standard error, and l95CI and u95CI indicate the lower and upper bounds of the 95% credible interval. Rhat is the convergence diagnostic, with values close to 1 indicating good convergence. Bulk\_ESS and Tail\_ESS represent the effective sample size for bulk and tail portions of the posterior distribution. Furthermore, parameters marked with ↑ indicate significant positive effects ( $P(\beta > 0) > 0.95$ ), while ↓ indicates significant negative effects ( $P(\beta < 0) > 0.95$ ).



| Parameter                                  | Estimate | SE     | l95CI   | u95CI  | Rhat  | Bulk_ESS | Tail_ESS |
|--------------------------------------------|----------|--------|---------|--------|-------|----------|----------|
| ↓Diffusion_Intercept                       | -17.979  | 11.954 | -47.693 | -9.347 | 1.006 | 676.914  | 301.740  |
| ↑Diffusion_Belief                          | 17.227   | 11.954 | 8.668   | 46.978 | 1.006 | 684.884  | 302.054  |
| Diffusion_Age                              | 0.002    | 0.002  | -0.002  | 0.006  | 1.001 | 4343.991 | 2956.489 |
| ↓Diffusion_Male                            | -0.102   | 0.049  | -0.196  | -0.008 | 1.000 | 3128.501 | 2833.523 |
| ↑Diffusion_Martial Status                  | 0.123    | 0.050  | 0.025   | 0.221  | 1.001 | 2610.635 | 2398.175 |
| Diffusion_Urbanization                     | -0.022   | 0.080  | -0.174  | 0.139  | 1.002 | 2611.473 | 2738.139 |
| Diffusion_Bachelor's degree                | 0.068    | 0.064  | -0.053  | 0.191  | 1.001 | 1777.737 | 2510.715 |
| ↓Diffusion_Postgraduate Degree             | -0.189   | 0.081  | -0.345  | -0.031 | 1.001 | 1761.889 | 2403.239 |
| ↑Diffusion_Household Income                | 0.232    | 0.066  | 0.101   | 0.361  | 1.003 | 2135.852 | 2364.750 |
| Diffusion_Student                          | 0.002    | 0.176  | -0.338  | 0.346  | 1.001 | 3092.793 | 2944.528 |
| Diffusion_Permanent Employee               | -0.118   | 0.085  | -0.284  | 0.049  | 1.003 | 1141.498 | 1875.726 |
| Diffusion_Large Company                    | 0.055    | 0.081  | -0.097  | 0.219  | 1.002 | 1225.380 | 2028.005 |
| Diffusion_Medium-sized Company             | 0.037    | 0.110  | -0.177  | 0.261  | 1.002 | 1056.907 | 2111.305 |
| Diffusion_Small Company                    | 0.039    | 0.123  | -0.196  | 0.286  | 1.003 | 1258.783 | 2195.919 |
| ↑Diffusion_Political Polarization          | 0.689    | 0.113  | 0.469   | 0.903  | 1.001 | 3026.938 | 2883.502 |
| Diffusion_Conservative Orientation         | 0.018    | 0.050  | -0.081  | 0.116  | 1.004 | 2422.368 | 2158.793 |
| ↓Diffusion_Trust in Government             | -0.361   | 0.058  | -0.474  | -0.246 | 1.000 | 2390.485 | 2613.478 |
| Diffusion_Trust in Scientist               | 0.081    | 0.054  | -0.021  | 0.183  | 1.000 | 2694.549 | 2775.170 |
| Diffusion_Religiosity                      | -0.072   | 0.073  | -0.215  | 0.069  | 1.000 | 2912.694 | 3041.125 |
| Diffusion_Social Media Usage               | 0.082    | 0.056  | -0.026  | 0.196  | 1.003 | 2556.788 | 2633.632 |
| ↑Diffusion_Video Usage                     | 0.228    | 0.066  | 0.099   | 0.356  | 1.001 | 2846.591 | 2836.451 |
| ↑Diffusion_TV/Newspaper Usage              | 0.109    | 0.053  | 0.006   | 0.210  | 1.000 | 2460.701 | 2424.017 |
| Diffusion_Radio/Magazines Usage            | 0.090    | 0.059  | -0.023  | 0.205  | 1.001 | 2569.698 | 2559.083 |
| ↑Diffusion_Online News Usage               | 0.134    | 0.058  | 0.023   | 0.248  | 1.000 | 2344.528 | 2645.915 |
| Diffusion_Message App Usage                | 0.055    | 0.053  | -0.048  | 0.161  | 1.001 | 2645.843 | 2855.272 |
| Diffusion_Personal Website Usage           | -0.035   | 0.062  | -0.156  | 0.087  | 1.001 | 2478.436 | 2094.843 |
| ↑Diffusion_Cultural Capital (at Age 15)    | 0.469    | 0.106  | 0.258   | 0.687  | 1.001 | 1721.882 | 2030.326 |
| ↑Diffusion_Economic Capital (at Age 15)    | 0.241    | 0.132  | -0.016  | 0.493  | 1.001 | 1701.834 | 2564.668 |
| ↓Diffusion_Having Books (at Age 15)        | -0.048   | 0.025  | -0.097  | -0.001 | 1.000 | 2694.720 | 2757.490 |
| ↑Diffusion_Having Books (Now)              | 0.042    | 0.023  | -0.004  | 0.088  | 1.000 | 2383.557 | 2336.501 |
| ↑Diffusion_Reading Books                   | 0.050    | 0.030  | -0.009  | 0.109  | 1.003 | 3039.869 | 2141.003 |
| Diffusion_Number of Friends                | -0.002   | 0.007  | -0.016  | 0.012  | 1.001 | 3997.577 | 2442.663 |
| ↓Diffusion_Bachelor's degree (Parents)     | -0.258   | 0.080  | -0.412  | -0.100 | 1.001 | 1906.096 | 2170.002 |
| ↑Diffusion_Postgraduate Degree (Parents)   | 0.196    | 0.065  | 0.070   | 0.320  | 1.002 | 2015.169 | 2215.117 |
| ↓Diffusion_Social Class (Now): Upper       | -0.194   | 0.075  | -0.337  | -0.047 | 1.001 | 1485.322 | 2549.661 |
| ↑Diffusion_Social Class (Now): Lower       | 0.142    | 0.061  | 0.021   | 0.260  | 1.001 | 1654.527 | 2186.394 |
| Diffusion_Social Class (at Age 15): Upper  | 0.045    | 0.072  | -0.100  | 0.188  | 1.000 | 1961.738 | 2694.318 |
| ↓Diffusion_Social Class (at Age 15): Lower | -0.206   | 0.061  | -0.325  | -0.086 | 1.002 | 1559.966 | 2161.420 |
| ↑Diffusion_Upward Social Mobility          | 0.138    | 0.062  | 0.016   | 0.255  | 1.000 | 1382.405 | 2597.898 |

**Table S10:** Parameter Estimates for Diffusion Action in the U.S. This table presents the Bayesian estimation results for each parameter. The Parameter column indicates the variable name, Estimate shows the median of the posterior distribution (Posterior Median), SE is the standard error, and l95CI and u95CI indicate the lower and upper bounds of the 95% credible interval. Rhat is the convergence diagnostic, with values close to 1 indicating good convergence. Bulk\_ESS and Tail\_ESS represent the effective sample size for bulk and tail portions of the posterior distribution. Furthermore, parameters marked with ↑ indicate significant positive effects ( $P(\beta > 0) > 0.95$ ), while ↓ indicates significant negative effects ( $P(\beta < 0) > 0.95$ ).

| Parameter                                      | Estimate | SE    | l95CI  | u95CI  | Rhat  | Bulk_ESS | Tail_ESS |
|------------------------------------------------|----------|-------|--------|--------|-------|----------|----------|
| ↓Recognition _ Intercept                       | -1.570   | 0.085 | -1.737 | -1.405 | 1.000 | 5923.549 | 3234.015 |
| ↑Recognition _ Age                             | 0.007    | 0.002 | 0.004  | 0.010  | 1.001 | 4764.792 | 3152.670 |
| ↑Recognition _ Male                            | 0.141    | 0.040 | 0.065  | 0.220  | 1.002 | 3678.996 | 2955.651 |
| ↓Recognition _ Martial Status                  | -0.091   | 0.040 | -0.166 | -0.013 | 1.001 | 3968.860 | 3062.067 |
| ↑Recognition _ Urbanization                    | 0.066    | 0.037 | -0.005 | 0.137  | 1.003 | 5711.737 | 2671.463 |
| Recognition _ Bachelor's degree                | -0.005   | 0.039 | -0.081 | 0.072  | 1.000 | 3739.788 | 2689.816 |
| Recognition _ Postgraduate Degree              | 0.045    | 0.085 | -0.118 | 0.214  | 1.000 | 4470.299 | 3307.577 |
| ↓Recognition _ Household Income                | -0.196   | 0.071 | -0.339 | -0.059 | 1.000 | 3283.060 | 2653.698 |
| Recognition _ Student                          | 0.090    | 0.145 | -0.197 | 0.373  | 1.000 | 4531.214 | 2982.051 |
| ↓Recognition _ Permanent Employee              | -0.141   | 0.084 | -0.303 | 0.024  | 1.001 | 1195.497 | 2256.443 |
| Recognition _ Large Company                    | 0.083    | 0.079 | -0.071 | 0.236  | 1.002 | 1378.171 | 2342.584 |
| Recognition _ Medium-sized Company             | 0.143    | 0.101 | -0.056 | 0.338  | 1.001 | 1218.441 | 2161.436 |
| Recognition _ Small Company                    | 0.050    | 0.102 | -0.149 | 0.253  | 1.001 | 1329.280 | 2109.475 |
| ↑Recognition _ Political Polarization          | 1.688    | 0.105 | 1.483  | 1.899  | 1.000 | 4230.281 | 3141.313 |
| ↑Recognition _ Conservative Orientation        | 0.413    | 0.040 | 0.334  | 0.490  | 1.002 | 5231.794 | 3288.648 |
| ↓Recognition _ Trust in Government             | -0.314   | 0.046 | -0.408 | -0.224 | 1.001 | 3095.893 | 3164.056 |
| ↑Recognition _ Trust in Scientist              | 0.356    | 0.040 | 0.277  | 0.436  | 1.003 | 3189.026 | 2828.770 |
| ↑Recognition _ Religiosity                     | 0.873    | 0.053 | 0.769  | 0.976  | 1.002 | 4792.071 | 3232.809 |
| ↑Recognition _ Social Media Usage              | 0.197    | 0.040 | 0.117  | 0.276  | 1.001 | 3550.645 | 3164.018 |
| ↑Recognition _ Video Usage                     | 0.301    | 0.036 | 0.231  | 0.372  | 1.002 | 4224.211 | 3055.313 |
| ↓Recognition _ TV/Newspaper Usage              | -0.116   | 0.036 | -0.185 | -0.045 | 1.001 | 3855.158 | 3060.384 |
| ↑Recognition _ Radio/Magazines Usage           | 0.122    | 0.047 | 0.032  | 0.212  | 1.001 | 4393.889 | 3479.699 |
| ↑Recognition _ Online News Usage               | 0.177    | 0.042 | 0.094  | 0.258  | 1.001 | 4152.966 | 3159.375 |
| ↓Recognition _ Message App Usage               | -0.147   | 0.049 | -0.243 | -0.052 | 1.002 | 4073.275 | 2866.843 |
| ↑Recognition _ Personal Website Usage          | 0.208    | 0.072 | 0.066  | 0.345  | 1.001 | 4889.222 | 3077.393 |
| ↑Recognition _ Cultural Capital (at Age 15)    | 0.665    | 0.096 | 0.478  | 0.857  | 1.001 | 2475.783 | 3034.640 |
| ↑Recognition _ Economic Capital (at Age 15)    | 0.290    | 0.099 | 0.099  | 0.486  | 1.000 | 2522.285 | 2653.809 |
| ↑Recognition _ Having Books (at Age 15)        | 0.037    | 0.019 | 0.001  | 0.074  | 1.000 | 3800.273 | 2697.459 |
| ↑Recognition _ Having Books (Now)              | 0.033    | 0.017 | 0.001  | 0.066  | 1.001 | 3609.730 | 3270.050 |
| ↑Recognition _ Reading Books                   | 0.074    | 0.021 | 0.033  | 0.115  | 1.000 | 4182.916 | 3085.494 |
| Recognition _ Number of Friends                | 0.010    | 0.033 | -0.053 | 0.077  | 1.001 | 3948.961 | 2562.515 |
| Recognition _ Bachelor's degree (Parents)      | -0.041   | 0.040 | -0.120 | 0.034  | 1.001 | 3714.148 | 3011.393 |
| Recognition _ Postgraduate Degree (Parents)    | 0.049    | 0.127 | -0.204 | 0.297  | 1.000 | 3808.331 | 2765.689 |
| Recognition _ Social Class (Now): Upper        | 0.012    | 0.085 | -0.158 | 0.181  | 1.001 | 3348.636 | 2996.649 |
| ↑Recognition _ Social Class (Now): Lower       | 0.239    | 0.048 | 0.142  | 0.336  | 1.001 | 2839.186 | 2750.732 |
| ↑Recognition _ Social Class (at Age 15): Upper | 0.131    | 0.076 | -0.014 | 0.287  | 1.003 | 3926.015 | 3000.186 |
| ↓Recognition _ Social Class (at Age 15): Lower | -0.132   | 0.050 | -0.230 | -0.035 | 1.001 | 2488.697 | 2584.987 |
| ↑Recognition _ Upward Social Mobility          | 0.359    | 0.047 | 0.268  | 0.453  | 1.003 | 2304.914 | 2658.996 |

**Table S11:** Parameter Estimates for Recognition in Japan. This table presents the Bayesian estimation results for each parameter. The Parameter column indicates the variable name, Estimate shows the median of the posterior distribution (Posterior Median), SE is the standard error, and l95CI and u95CI indicate the lower and upper bounds of the 95% credible interval. Rhat is the convergence diagnostic, with values close to 1 indicating good convergence. Bulk\_ESS and Tail\_ESS represent the effective sample size for bulk and tail portions of the posterior distribution. Furthermore, parameters marked with ↑ indicate significant positive effects ( $P(\beta > 0) > 0.95$ ), while ↓ indicates significant negative effects ( $P(\beta < 0) > 0.95$ ).

| Parameter                               | Estimate | SE    | l95CI   | u95CI  | Rhat  | Bulk_ESS | Tail_ESS |
|-----------------------------------------|----------|-------|---------|--------|-------|----------|----------|
| ↓Belief Intercept                       | -17.696  | 9.015 | -42.688 | -9.757 | 1.003 | 658.152  | 267.152  |
| ↑Belief Recognition                     | 16.093   | 9.014 | 8.167   | 40.959 | 1.003 | 656.854  | 267.575  |
| ↑Belief Age                             | 0.017    | 0.002 | 0.013   | 0.022  | 1.001 | 4782.720 | 3824.853 |
| ↑Belief Male                            | 0.217    | 0.055 | 0.108   | 0.320  | 1.003 | 3347.530 | 2914.863 |
| ↑Belief Martial Status                  | 0.107    | 0.053 | 0.005   | 0.210  | 1.001 | 3823.846 | 2772.045 |
| Belief Urbanization                     | -0.022   | 0.049 | -0.120  | 0.075  | 1.001 | 5283.153 | 3029.608 |
| ↓Belief Bachelor's degree               | -0.231   | 0.052 | -0.333  | -0.129 | 1.000 | 4205.983 | 2902.226 |
| ↓Belief Postgraduate Degree             | -0.291   | 0.113 | -0.512  | -0.072 | 1.001 | 3689.714 | 2804.856 |
| Belief Household Income                 | 0.015    | 0.099 | -0.180  | 0.210  | 1.002 | 3978.190 | 3110.912 |
| Belief Student                          | 0.015    | 0.202 | -0.387  | 0.417  | 1.001 | 3785.983 | 2782.400 |
| Belief Permanent Employee               | -0.058   | 0.113 | -0.273  | 0.164  | 1.002 | 1184.369 | 2103.303 |
| Belief Large Company                    | 0.162    | 0.104 | -0.043  | 0.366  | 1.003 | 1120.102 | 2030.097 |
| ↑Belief Medium-sized Company            | 0.272    | 0.136 | 0.004   | 0.533  | 1.003 | 1223.967 | 2156.146 |
| Belief Small Company                    | 0.212    | 0.137 | -0.052  | 0.478  | 1.003 | 1170.333 | 2301.050 |
| ↑Belief Political Polarization          | 1.149    | 0.120 | 0.912   | 1.388  | 1.001 | 4416.537 | 3087.503 |
| ↑Belief Conservative Orientation        | 0.449    | 0.052 | 0.348   | 0.552  | 1.000 | 3359.208 | 2730.739 |
| ↓Belief Trust in Government             | -0.391   | 0.063 | -0.514  | -0.270 | 1.000 | 3656.088 | 3197.025 |
| ↓Belief Trust in Scientist              | -0.143   | 0.052 | -0.243  | -0.039 | 1.000 | 3278.440 | 2928.852 |
| ↑Belief Religiosity                     | 1.308    | 0.069 | 1.177   | 1.442  | 1.000 | 4038.230 | 2946.322 |
| Belief Social Media Usage               | -0.033   | 0.051 | -0.132  | 0.071  | 1.001 | 3775.724 | 2844.673 |
| ↑Belief Video Usage                     | 0.188    | 0.050 | 0.092   | 0.287  | 1.000 | 4928.703 | 3002.422 |
| ↓Belief TV/Newspaper Usage              | -0.282   | 0.049 | -0.378  | -0.187 | 1.001 | 4298.243 | 3164.622 |
| ↓Belief Radio/Magazines Usage           | -0.103   | 0.061 | -0.220  | 0.016  | 1.001 | 3757.613 | 2898.666 |
| ↑Belief Online News Usage               | 0.149    | 0.056 | 0.038   | 0.262  | 1.001 | 4059.133 | 2469.808 |
| Belief Message App Usage                | 0.101    | 0.063 | -0.023  | 0.221  | 1.000 | 3925.663 | 3031.929 |
| Belief Personal Website Usage           | 0.096    | 0.088 | -0.079  | 0.266  | 1.001 | 4963.078 | 3526.365 |
| Belief Cultural Capital (at Age 15)     | 0.008    | 0.132 | -0.250  | 0.260  | 1.001 | 3444.238 | 3145.271 |
| Belief Economic Capital (at Age 15)     | 0.162    | 0.143 | -0.116  | 0.441  | 1.001 | 3663.545 | 3253.843 |
| Belief Having Books (at Age 15)         | 0.031    | 0.023 | -0.017  | 0.076  | 1.000 | 4109.148 | 3205.973 |
| ↓Belief Having Books (Now)              | -0.062   | 0.021 | -0.102  | -0.021 | 1.000 | 3136.946 | 2853.653 |
| Belief Reading Books                    | -0.020   | 0.028 | -0.077  | 0.034  | 1.001 | 4051.410 | 3106.082 |
| Belief Number of Friends                | -0.007   | 0.044 | -0.097  | 0.074  | 1.001 | 3915.788 | 2691.845 |
| Belief Bachelor's degree (Parents)      | 0.022    | 0.054 | -0.084  | 0.124  | 1.000 | 3854.125 | 2872.491 |
| Belief Postgraduate Degree (Parents)    | 0.155    | 0.162 | -0.176  | 0.481  | 1.000 | 4282.438 | 2811.696 |
| Belief Social Class (Now): Upper        | 0.142    | 0.110 | -0.083  | 0.358  | 1.001 | 3553.547 | 2965.209 |
| ↑Belief Social Class (Now): Lower       | 0.249    | 0.060 | 0.133   | 0.371  | 1.003 | 3058.640 | 3168.078 |
| ↑Belief Social Class (at Age 15): Upper | 0.379    | 0.096 | 0.192   | 0.559  | 1.001 | 3442.712 | 2963.698 |
| Belief Social Class (at Age 15): Lower  | -0.039   | 0.066 | -0.169  | 0.087  | 1.001 | 3049.406 | 2990.552 |
| ↑Belief Upward Social Mobility          | 0.122    | 0.064 | -0.003  | 0.248  | 1.000 | 2812.114 | 2465.954 |

**Table S12:** Parameter Estimates for Belief in Japan. This table presents the Bayesian estimation results for each parameter. The Parameter column indicates the variable name, Estimate shows the median of the posterior distribution (Posterior Median), SE is the standard error, and l95CI and u95CI indicate the lower and upper bounds of the 95% credible interval. Rhat is the convergence diagnostic, with values close to 1 indicating good convergence. Bulk\_ESS and Tail\_ESS represent the effective sample size for bulk and tail portions of the posterior distribution. Furthermore, parameters marked with ↑ indicate significant positive effects ( $P(\beta > 0) > 0.95$ ), while ↓ indicates significant negative effects ( $P(\beta < 0) > 0.95$ ).

| Parameter                                      | Estimate | SE     | l95CI   | u95CI  | Rhat  | Bulk_ESS | Tail_ESS |
|------------------------------------------------|----------|--------|---------|--------|-------|----------|----------|
| ↓Demonstrative Intercept                       | -17.391  | 13.277 | -65.844 | -8.596 | 1.025 | 246.225  | 97.437   |
| ↑Demonstrative Belief                          | 16.257   | 13.275 | 7.499   | 64.658 | 1.025 | 246.412  | 98.483   |
| ↓Demonstrative Age                             | -0.011   | 0.004  | -0.020  | -0.002 | 1.001 | 3795.163 | 3401.368 |
| Demonstrative Male                             | 0.135    | 0.114  | -0.091  | 0.362  | 1.000 | 3431.113 | 2928.676 |
| Demonstrative Martial Status                   | 0.147    | 0.111  | -0.072  | 0.364  | 1.001 | 3958.242 | 3054.849 |
| Demonstrative Urbanization                     | 0.045    | 0.100  | -0.155  | 0.240  | 1.001 | 4414.357 | 3048.693 |
| Demonstrative Bachelor's degree                | -0.038   | 0.110  | -0.254  | 0.181  | 1.002 | 4066.081 | 2681.684 |
| ↑Demonstrative Postgraduate Degree             | 0.673    | 0.206  | 0.259   | 1.078  | 1.000 | 4477.754 | 3142.373 |
| Demonstrative Household Income                 | 0.092    | 0.181  | -0.256  | 0.440  | 1.000 | 3371.903 | 3329.454 |
| Demonstrative Student                          | -0.149   | 0.390  | -0.937  | 0.590  | 1.001 | 3782.940 | 3270.695 |
| Demonstrative Permanent Employee               | 0.253    | 0.221  | -0.177  | 0.690  | 1.001 | 1044.413 | 1827.843 |
| Demonstrative Large Company                    | 0.080    | 0.204  | -0.334  | 0.464  | 1.002 | 1030.418 | 1658.666 |
| Demonstrative Medium-sized Company             | 0.089    | 0.257  | -0.419  | 0.582  | 1.001 | 1030.979 | 1759.998 |
| Demonstrative Small Company                    | -0.150   | 0.265  | -0.681  | 0.361  | 1.001 | 1047.795 | 1718.999 |
| Demonstrative Political Polarization           | 0.184    | 0.250  | -0.307  | 0.658  | 1.002 | 3853.987 | 3130.191 |
| ↓Demonstrative Conservative Orientation        | -0.439   | 0.108  | -0.650  | -0.229 | 1.001 | 3908.672 | 2861.432 |
| ↑Demonstrative Trust in Government             | 0.620    | 0.121  | 0.387   | 0.861  | 1.001 | 3641.390 | 3265.940 |
| Demonstrative Trust in Scientist               | -0.047   | 0.104  | -0.253  | 0.157  | 1.000 | 3356.634 | 3407.000 |
| ↑Demonstrative Religiosity                     | 0.657    | 0.129  | 0.410   | 0.906  | 1.001 | 3734.337 | 2674.438 |
| ↑Demonstrative Social Media Usage              | 0.260    | 0.106  | 0.056   | 0.473  | 1.002 | 4300.940 | 3147.911 |
| Demonstrative Video Usage                      | 0.020    | 0.108  | -0.199  | 0.233  | 1.003 | 4760.170 | 3016.973 |
| ↓Demonstrative TV/Newspaper Usage              | -0.561   | 0.099  | -0.759  | -0.367 | 1.000 | 4465.149 | 3014.021 |
| ↑Demonstrative Radio/Magazines Usage           | 0.289    | 0.121  | 0.051   | 0.526  | 1.000 | 3882.358 | 3165.494 |
| Demonstrative Online News Usage                | -0.089   | 0.118  | -0.323  | 0.138  | 1.001 | 3266.076 | 2919.954 |
| Demonstrative Message App Usage                | 0.188    | 0.127  | -0.062  | 0.441  | 1.001 | 3753.448 | 2850.587 |
| ↑Demonstrative Personal Website Usage          | 0.482    | 0.160  | 0.171   | 0.796  | 1.000 | 3683.438 | 3119.948 |
| Demonstrative Cultural Capital (at Age 15)     | 0.308    | 0.279  | -0.225  | 0.843  | 1.001 | 2632.350 | 2899.798 |
| ↓Demonstrative Economic Capital (at Age 15)    | -1.481   | 0.283  | -2.036  | -0.946 | 1.001 | 2971.675 | 2781.735 |
| ↓Demonstrative Having Books (at Age 15)        | -0.143   | 0.054  | -0.250  | -0.042 | 1.000 | 4509.380 | 2803.669 |
| Demonstrative Having Books (Now)               | 0.033    | 0.044  | -0.057  | 0.120  | 1.000 | 3166.277 | 2885.899 |
| Demonstrative Reading Books                    | 0.016    | 0.059  | -0.100  | 0.131  | 1.000 | 3737.515 | 2943.017 |
| Demonstrative Number of Friends                | -0.011   | 0.125  | -0.281  | 0.206  | 1.002 | 3873.008 | 2896.012 |
| Demonstrative Bachelor's degree (Parents)      | 0.077    | 0.110  | -0.141  | 0.291  | 1.000 | 4737.715 | 3210.255 |
| Demonstrative Postgraduate Degree (Parents)    | -0.072   | 0.302  | -0.680  | 0.504  | 1.001 | 3819.737 | 3135.320 |
| ↑Demonstrative Social Class (Now): Upper       | 0.703    | 0.185  | 0.350   | 1.069  | 1.002 | 3115.368 | 2643.158 |
| Demonstrative Social Class (Now): Lower        | -0.039   | 0.130  | -0.294  | 0.219  | 1.001 | 3552.083 | 2917.098 |
| ↑Demonstrative Social Class (at Age 15): Upper | 0.483    | 0.165  | 0.160   | 0.807  | 1.002 | 3091.731 | 2870.666 |
| Demonstrative Social Class (at Age 15): Lower  | -0.159   | 0.136  | -0.425  | 0.118  | 1.001 | 3711.369 | 2899.696 |
| Demonstrative Upward Social Mobility           | 0.138    | 0.127  | -0.114  | 0.387  | 1.002 | 3298.914 | 2982.657 |

**Table S13:** Parameter Estimates for Demonstrative Action in Japan. This table presents the Bayesian estimation results for each parameter. The Parameter column indicates the variable name, Estimate shows the median of the posterior distribution (Posterior Median), SE is the standard error, and l95CI and u95CI indicate the lower and upper bounds of the 95% credible interval. Rhat is the convergence diagnostic, with values close to 1 indicating good convergence. Bulk\_ESS and Tail\_ESS represent the effective sample size for bulk and tail portions of the posterior distribution. Furthermore, parameters marked with ↑ indicate significant positive effects ( $P(\beta > 0) > 0.95$ ), while ↓ indicates significant negative effects ( $P(\beta < 0) > 0.95$ ).

| Parameter                                  | Estimate | SE     | l95CI   | u95CI   | Rhat  | Bulk_ESS | Tail_ESS |
|--------------------------------------------|----------|--------|---------|---------|-------|----------|----------|
| ↓Diffusion_Intercept                       | -18.239  | 10.873 | -53.100 | -10.392 | 1.023 | 172.467  | 55.020   |
| ↑Diffusion_Belief                          | 15.366   | 10.875 | 7.621   | 49.893  | 1.024 | 173.014  | 54.809   |
| ↑Diffusion_Age                             | 0.015    | 0.004  | 0.008   | 0.023   | 1.001 | 4040.166 | 3143.916 |
| Diffusion_Male                             | -0.093   | 0.096  | -0.281  | 0.095   | 1.001 | 3592.914 | 3247.631 |
| Diffusion_Martial Status                   | 0.038    | 0.090  | -0.137  | 0.210   | 1.000 | 4065.109 | 3031.657 |
| Diffusion_Urbanization                     | -0.066   | 0.084  | -0.231  | 0.096   | 1.000 | 4718.752 | 2996.121 |
| Diffusion_Bachelor's degree                | -0.072   | 0.090  | -0.250  | 0.109   | 1.000 | 4603.901 | 3148.781 |
| Diffusion_Postgraduate Degree              | -0.342   | 0.214  | -0.766  | 0.061   | 1.000 | 4949.204 | 2842.591 |
| Diffusion_Household Income                 | 0.018    | 0.155  | -0.294  | 0.321   | 1.000 | 3701.374 | 3114.419 |
| Diffusion_Student                          | 0.375    | 0.365  | -0.350  | 1.065   | 1.000 | 3190.151 | 2558.986 |
| Diffusion_Permanent Employee               | -0.080   | 0.179  | -0.430  | 0.272   | 1.002 | 951.046  | 1782.351 |
| Diffusion_Large Company                    | 0.117    | 0.159  | -0.199  | 0.421   | 1.003 | 1110.354 | 2077.422 |
| Diffusion_Medium-sized Company             | 0.109    | 0.212  | -0.308  | 0.520   | 1.002 | 1013.691 | 1597.159 |
| Diffusion_Small Company                    | -0.077   | 0.218  | -0.516  | 0.344   | 1.003 | 1038.371 | 1560.871 |
| ↑Diffusion_Political Polarization          | 0.564    | 0.196  | 0.185   | 0.961   | 1.000 | 4891.897 | 2926.492 |
| Diffusion_Conservative Orientation         | -0.024   | 0.086  | -0.193  | 0.142   | 1.000 | 3417.436 | 3037.635 |
| Diffusion_Trust in Government              | -0.121   | 0.107  | -0.334  | 0.093   | 1.001 | 3002.178 | 2484.583 |
| Diffusion_Trust in Scientist               | 0.053    | 0.084  | -0.113  | 0.218   | 1.001 | 3279.898 | 3011.661 |
| ↑Diffusion_Religiosity                     | 0.331    | 0.110  | 0.116   | 0.549   | 1.000 | 4468.362 | 2908.991 |
| ↑Diffusion_Social Media Usage              | 0.306    | 0.088  | 0.128   | 0.475   | 1.000 | 3439.064 | 3331.192 |
| Diffusion_Video Usage                      | 0.114    | 0.084  | -0.048  | 0.282   | 1.000 | 4079.179 | 2945.980 |
| Diffusion_TV/Newspaper Usage               | 0.024    | 0.083  | -0.136  | 0.182   | 1.002 | 4012.460 | 2968.934 |
| ↑Diffusion_Radio/Magazines Usage           | 0.259    | 0.096  | 0.068   | 0.443   | 1.001 | 4065.437 | 2916.050 |
| Diffusion_Online News Usage                | 0.085    | 0.091  | -0.093  | 0.267   | 1.001 | 3739.414 | 3107.220 |
| Diffusion_Message App Usage                | 0.115    | 0.102  | -0.086  | 0.320   | 1.002 | 3904.301 | 2885.165 |
| Diffusion_Personal Website Usage           | 0.102    | 0.136  | -0.160  | 0.370   | 1.000 | 4277.747 | 3091.977 |
| ↑Diffusion_Cultural Capital (at Age 15)    | 0.685    | 0.223  | 0.252   | 1.135   | 1.000 | 2770.716 | 2822.105 |
| ↑Diffusion_Economic Capital (at Age 15)    | 0.466    | 0.259  | -0.027  | 0.981   | 1.000 | 2888.407 | 2755.285 |
| Diffusion_Having Books (at Age 15)         | -0.045   | 0.038  | -0.119  | 0.030   | 1.000 | 3995.213 | 3182.102 |
| ↑Diffusion_Having Books (Now)              | 0.059    | 0.034  | -0.007  | 0.126   | 1.000 | 3735.997 | 3264.562 |
| Diffusion_Reading Books                    | 0.031    | 0.047  | -0.058  | 0.125   | 1.001 | 4034.428 | 3148.366 |
| Diffusion_Number of Friends                | -0.111   | 0.146  | -0.436  | 0.138   | 1.002 | 4117.285 | 2175.212 |
| Diffusion_Bachelor's degree (Parents)      | -0.036   | 0.093  | -0.217  | 0.142   | 1.000 | 3693.547 | 2814.862 |
| Diffusion_Postgraduate Degree (Parents)    | 0.003    | 0.268  | -0.538  | 0.515   | 1.000 | 3922.230 | 3134.197 |
| ↑Diffusion_Social Class (Now): Upper       | 0.413    | 0.173  | 0.076   | 0.761   | 1.000 | 3247.305 | 2933.707 |
| Diffusion_Social Class (Now): Lower        | 0.126    | 0.103  | -0.074  | 0.324   | 1.000 | 4030.911 | 3108.224 |
| Diffusion_Social Class (at Age 15): Upper  | 0.043    | 0.146  | -0.249  | 0.330   | 1.000 | 3496.135 | 3088.279 |
| ↓Diffusion_Social Class (at Age 15): Lower | -0.190   | 0.112  | -0.404  | 0.022   | 1.000 | 4009.919 | 3129.762 |
| ↑Diffusion_Upward Social Mobility          | 0.302    | 0.107  | 0.091   | 0.512   | 1.000 | 3454.448 | 3352.790 |

**Table S14:** Parameter Estimates for Diffusion Action in Japan. This table presents the Bayesian estimation results for each parameter. The Parameter column indicates the variable name, Estimate shows the median of the posterior distribution (Posterior Median), SE is the standard error, and l95CI and u95CI indicate the lower and upper bounds of the 95% credible interval. Rhat is the convergence diagnostic, with values close to 1 indicating good convergence. Bulk\_ESS and Tail\_ESS represent the effective sample size for bulk and tail portions of the posterior distribution. Furthermore, parameters marked with ↑ indicate significant positive effects ( $P(\beta > 0) > 0.95$ ), while ↓ indicates significant negative effects ( $P(\beta < 0) > 0.95$ ).

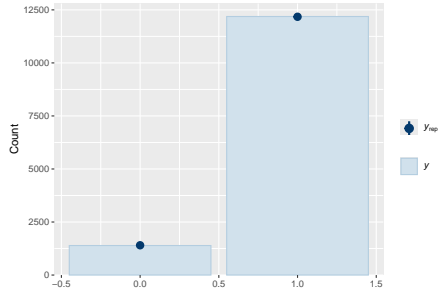

(a) Bars plot for Recognition.

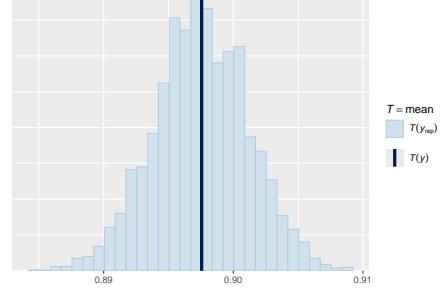

(b) Summary statistic check for Recognition.

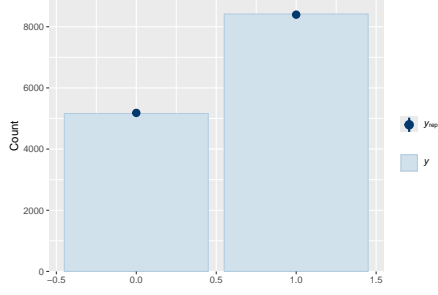

(c) Bars plot for Belief.

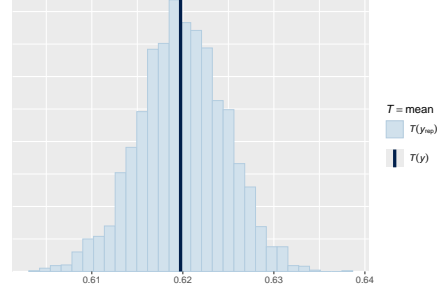

(d) Summary statistic check for Belief.

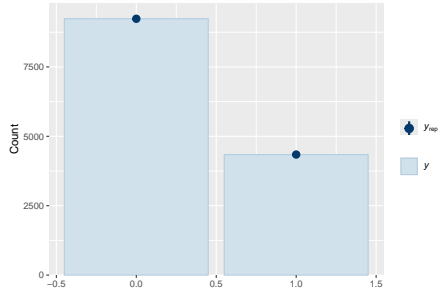

(e) Bars plot for Demonstrative Action.

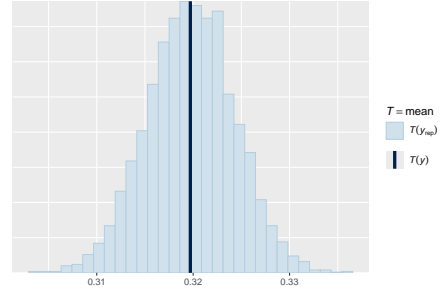

(f) Summary statistic check for Demonstrative Action.

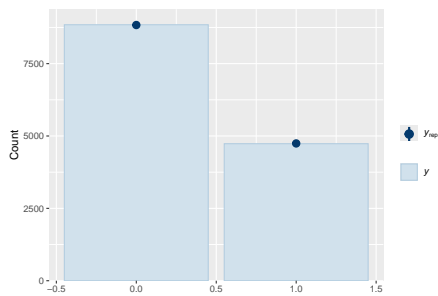

(g) Bars plot for Diffusion Action.

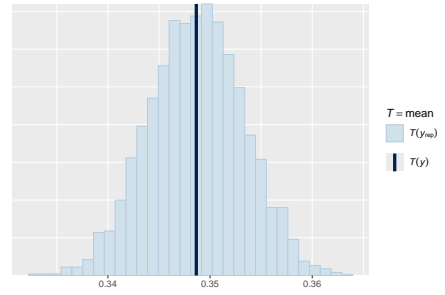

(h) Summary statistic check for Diffusion Action.

**Fig. S31:** Posterior predictive checks for the four Bernoulli outcomes (Recognition, Belief, Demonstrative Action, Diffusion Action) in the U.S. Subfigures (a, c, e, g) show the comparison of observed vs. predicted frequencies, and (b, d, f, h) show the comparison of summary statistics. The close alignment between observed and predicted values suggests that the model adequately captures the data-generating process for each outcome.

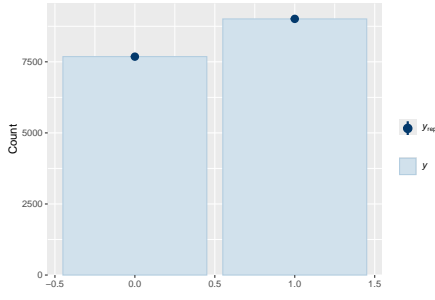

(a) Bars plot for Recognition.

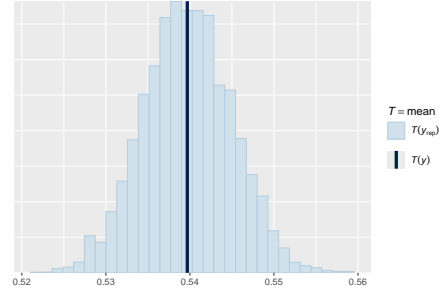

(b) Summary statistic check for Recognition.

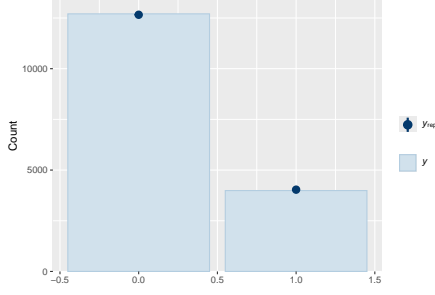

(c) Bars plot for Belief.

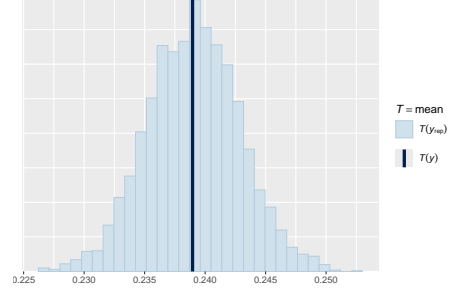

(d) Summary statistic check for Belief.

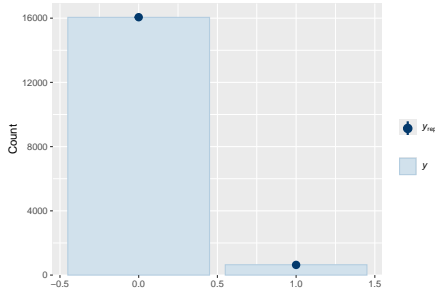

(e) Bars plot for Demonstrative Action.

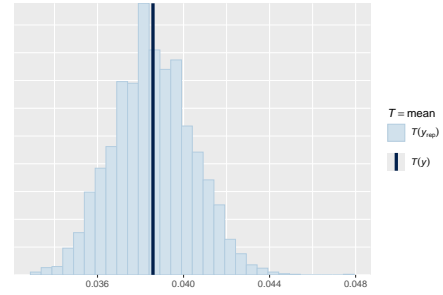

(f) Summary statistic check for Demonstrative Action.

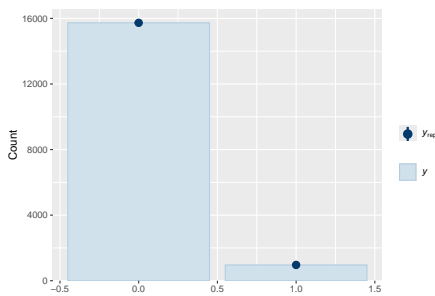

(g) Bars plot for Diffusion Action

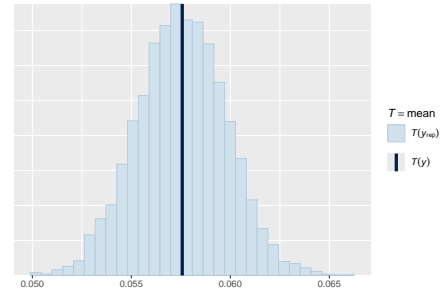

(h) Summary statistic check for Diffusion Action.

**Fig. S32:** Posterior predictive checks for the four Bernoulli outcomes (Recognition, Belief, Demonstrative Action, Diffusion Action) in Japan. Subfigures (a, c, e, g) show the comparison of observed vs. predicted frequencies, and (b, d, f, h) show the comparison of summary statistics. The close alignment between observed and predicted values suggests that the model adequately captures the data-generating process for each outcome.

**Table S15:** LOO comparison of each model for the U.S.  $\widehat{\text{elpd}}_{\text{LOO}}$  is estimated log predictive density, where higher (less negative) values indicate better predictive performance  $p_{\text{LOO}}$  is effective number of parameters, reflecting model complexity.  $\text{SE}(\widehat{\text{elpd}}_{\text{LOO}})$  and  $\text{SE}(p_{\text{LOO}})$  are Standard error of  $\widehat{\text{elpd}}_{\text{LOO}}$  and  $p_{\text{LOO}}$ , reflecting uncertainty in the predictive performance.

| Model                                         | $\widehat{\text{elpd}}_{\text{LOO}}$ | $\text{SE}(\widehat{\text{elpd}}_{\text{LOO}})$ | $p_{\text{LOO}}$ | $\text{SE}(p_{\text{LOO}})$ |
|-----------------------------------------------|--------------------------------------|-------------------------------------------------|------------------|-----------------------------|
| Our Model                                     | -21557.3                             | 76.0                                            | 156.7            | 4.9                         |
| A-1 Changed priors: $\mathcal{N}(0, 1)$       | -21557.3                             | 76.0                                            | 156.7            | 4.9                         |
| A-2 Changed priors: $\mathcal{N}(0, 10)$      | -21557.3                             | 76.0                                            | 156.7            | 4.9                         |
| B-1 Changed iteration: Iter 1000, Warmup 500  | -21556.5                             | 75.9                                            | 155.9            | 3.7                         |
| B-2 Changed iteration: Iter 4000, Warmup 2000 | -21557.4                             | 76.0                                            | 156.8            | 4.5                         |
| C-1 Changed <code>adapt_delta</code> : 0.90   | -21560.1                             | 76.2                                            | 159.5            | 7.3                         |
| C-2 Changed <code>adapt_delta</code> : 0.99   | -21557.2                             | 76.0                                            | 156.5            | 5.0                         |



**Table S16:** LOO comparison of each model for the Japan.  $\widehat{\text{elpd}}_{\text{LOO}}$  is estimated log predictive density, where higher (less negative) values indicate better predictive performance  $p_{\text{LOO}}$  is effective number of parameters, reflecting model complexity.  $\text{SE}(\widehat{\text{elpd}}_{\text{LOO}})$  and  $\text{SE}(p_{\text{LOO}})$  are Standard error of  $\widehat{\text{elpd}}_{\text{LOO}}$  and  $p_{\text{LOO}}$ , reflecting uncertainty in the predictive performance.

| Model                                         | $\widehat{\text{elpd}}_{\text{LOO}}$ | $\text{SE}(\widehat{\text{elpd}}_{\text{LOO}})$ | $p_{\text{LOO}}$ | $\text{SE}(p_{\text{LOO}})$ |
|-----------------------------------------------|--------------------------------------|-------------------------------------------------|------------------|-----------------------------|
| Our Model                                     | -20221.1                             | 104.0                                           | 156.7            | 4.4                         |
| A-1 Changed priors: $\mathcal{N}(0, 1)$       | -20221.1                             | 104.0                                           | 156.7            | 4.4                         |
| A-2 Changed priors: $\mathcal{N}(0, 10)$      | -20221.1                             | 104.0                                           | 156.7            | 4.4                         |
| B-1 Changed iteration: Iter 1000, Warmup 500  | -20219.3                             | 104.0                                           | 154.9            | 3.4                         |
| B-2 Changed iteration: Iter 4000, Warmup 2000 | -20220.2                             | 104.0                                           | 155.7            | 3.8                         |
| C-1 Changed <code>adapt_delta</code> : 0.90   | -20219.5                             | 104.0                                           | 155.1            | 3.7                         |
| C-2 Changed <code>adapt_delta</code> : 0.99   | -20219.1                             | 104.0                                           | 154.2            | 3.2                         |

| Parameter                                    | Estimate | SE    | l95CI  | u95CI  | Rhat  | Bulk_ESS  | Tail_ESS |
|----------------------------------------------|----------|-------|--------|--------|-------|-----------|----------|
| ↑Recognition_Intercept                       | 0.472    | 0.006 | 0.460  | 0.483  | 1.000 | 19223.399 | 7138.054 |
| ↓Recognition_Age                             | -0.096   | 0.007 | -0.110 | -0.082 | 1.001 | 13214.522 | 7878.475 |
| ↑Recognition_Male                            | 0.136    | 0.006 | 0.124  | 0.148  | 1.000 | 18134.030 | 7975.715 |
| ↑Recognition_Martial Status                  | 0.035    | 0.006 | 0.022  | 0.047  | 1.001 | 18186.749 | 7156.113 |
| Recognition_Urbanization                     | -0.006   | 0.006 | -0.018 | 0.005  | 1.000 | 17578.414 | 7301.039 |
| Recognition_Bachelor's degree                | -0.007   | 0.007 | -0.021 | 0.008  | 1.000 | 13206.218 | 8017.958 |
| ↓Recognition_Postgraduate Degree             | -0.021   | 0.007 | -0.035 | -0.007 | 1.000 | 13491.916 | 8053.224 |
| ↑Recognition_Household Income                | 0.057    | 0.007 | 0.042  | 0.071  | 1.000 | 14888.120 | 7067.371 |
| Recognition_Student                          | 0.004    | 0.006 | -0.008 | 0.016  | 1.000 | 19762.233 | 7855.888 |
| ↓Recognition_Permanent Employee              | -0.033   | 0.012 | -0.056 | -0.010 | 1.000 | 6246.732  | 7408.713 |
| ↑Recognition_Large Company                   | 0.056    | 0.009 | 0.038  | 0.075  | 1.000 | 6110.246  | 7640.441 |
| ↑Recognition_Medium-sized Company            | 0.045    | 0.011 | 0.023  | 0.066  | 1.000 | 5738.740  | 6656.068 |
| ↑Recognition_Small Company                   | 0.031    | 0.009 | 0.014  | 0.048  | 1.001 | 6119.525  | 7544.297 |
| ↑Recognition_Political Polarization          | 0.198    | 0.006 | 0.186  | 0.211  | 1.000 | 18638.441 | 7816.753 |
| ↓Recognition_Conservative Orientation        | -0.041   | 0.006 | -0.053 | -0.029 | 1.000 | 16570.851 | 7586.730 |
| ↓Recognition_Trust in Government             | -0.101   | 0.007 | -0.114 | -0.088 | 1.000 | 15154.392 | 8194.159 |
| ↑Recognition_Trust in Scientist              | 0.019    | 0.007 | 0.006  | 0.032  | 1.000 | 14469.807 | 7658.788 |
| ↓Recognition_Religiosity                     | -0.047   | 0.006 | -0.059 | -0.035 | 1.000 | 15650.257 | 7543.459 |
| ↑Recognition_Social Media Usage              | 0.018    | 0.006 | 0.006  | 0.031  | 1.000 | 17378.708 | 7442.547 |
| ↑Recognition_Video Usage                     | 0.030    | 0.006 | 0.018  | 0.042  | 1.000 | 16420.242 | 7470.057 |
| ↓Recognition_TV/Newspaper Usage              | -0.030   | 0.007 | -0.043 | -0.017 | 1.000 | 16298.674 | 7347.923 |
| ↑Recognition_Radio/Magazines Usage           | 0.024    | 0.007 | 0.010  | 0.037  | 1.000 | 14391.035 | 7964.854 |
| ↑Recognition_Online News Usage               | 0.096    | 0.007 | 0.083  | 0.110  | 1.000 | 15666.084 | 7759.122 |
| ↓Recognition_Message App Usage               | -0.035   | 0.007 | -0.048 | -0.022 | 1.000 | 15232.581 | 7881.278 |
| Recognition_Personal Website Usage           | 0.002    | 0.007 | -0.011 | 0.015  | 1.000 | 17087.310 | 7377.072 |
| ↑Recognition_Cultural Capital (at Age 15)    | 0.106    | 0.007 | 0.092  | 0.120  | 1.000 | 11940.229 | 8067.971 |
| Recognition_Economic Capital (at Age 15)     | 0.001    | 0.007 | -0.013 | 0.015  | 1.001 | 11363.001 | 6961.936 |
| ↑Recognition_Having Books (at Age 15)        | 0.049    | 0.007 | 0.036  | 0.062  | 1.000 | 17801.836 | 8005.383 |
| ↑Recognition_Having Books (Now)              | 0.054    | 0.007 | 0.041  | 0.068  | 1.001 | 14636.136 | 8277.565 |
| ↑Recognition_Reading Books                   | 0.054    | 0.006 | 0.041  | 0.067  | 1.000 | 15846.229 | 8218.564 |
| Recognition_Number of Friends                | 0.002    | 0.006 | -0.009 | 0.013  | 1.000 | 20724.252 | 7194.157 |
| ↓Recognition_Bachelor's degree (Parents)     | -0.015   | 0.008 | -0.030 | -0.001 | 1.000 | 12320.948 | 8064.479 |
| Recognition_Postgraduate Degree (Parents)    | 0.007    | 0.008 | -0.008 | 0.022  | 1.000 | 12705.196 | 8278.446 |
| Recognition_Social Class (Now): Upper        | -0.005   | 0.007 | -0.019 | 0.009  | 1.001 | 12794.833 | 7441.712 |
| ↑Recognition_Social Class (Now): Lower       | 0.049    | 0.007 | 0.035  | 0.063  | 1.000 | 13265.452 | 8244.122 |
| ↑Recognition_Social Class (at Age 15): Upper | 0.012    | 0.007 | -0.002 | 0.025  | 1.000 | 13742.886 | 8241.763 |
| ↑Recognition_Social Class (at Age 15): Lower | 0.013    | 0.007 | -0.001 | 0.027  | 1.000 | 11425.068 | 7842.879 |
| ↓Recognition_Upward Social Mobility          | -0.025   | 0.008 | -0.040 | -0.010 | 1.000 | 11171.119 | 8263.380 |

**Table S17:** Parameter Estimates for Recognition by **Hierarchical Zero-Inflated Binomial Model** in the U.S. This table presents the Bayesian estimation results for each parameter. The Parameter column indicates the variable name, Estimate shows the median of the posterior distribution (Posterior Median), SE is the standard error, and l95CI and u95CI indicate the lower and upper bounds of the 95% credible interval. Rhat is the convergence diagnostic, with values close to 1 indicating good convergence. Bulk\_ESS and Tail\_ESS represent the effective sample size for bulk and tail portions of the posterior distribution. Furthermore, parameters marked with ↑ indicate significant positive effects ( $P(\beta > 0) > 0.95$ ), while ↓ indicates significant negative effects ( $P(\beta < 0) > 0.95$ ).

## References

- [1] Bakker, B.N., Schumacher, G., Gothreau, C., Arceneaux, K.: Conservatives and liberals have similar physiological responses to threats. *Nature human behaviour* 4(6), 613–621 (2020)

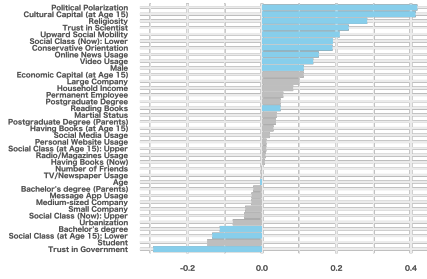

(a) Effects of explanatory variables on conspiracy theory **Recognition** by the SEM model.

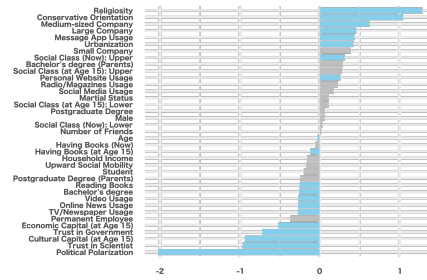

(b) Effects of explanatory variables on conspiracy theory **Belief** by the SEM model.

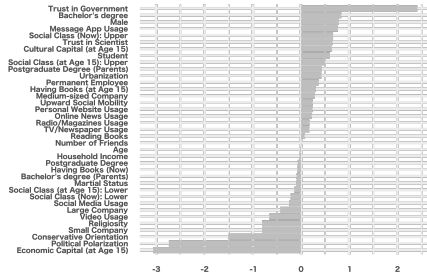

(c) Effects of explanatory variables on conspiracy theory **Demonstrative Action** by the SEM model.

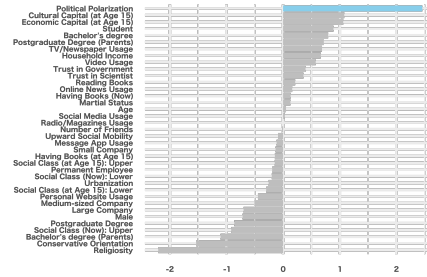

(d) Effects of explanatory variables on conspiracy theory **Diffusion Action** by the SEM model.

**Fig. S33:** Effects of explanatory variables on conspiracy theory engagement in the U.S. by the SEM model. Each bar represents the estimated effect of an explanatory variable. Bars shown in skyblue denote statistically significant effects with p-values below 0.05, while those in gray represent non-significant effects ( $p > 0.05$ ).

- 579 [2] Tanaka, T., Hamaya, S.: Net wa Shakai wo Bundan Shinai. Kadokawa Shinsho.  
580 ISBN: 978-4040823030 (2020)
- 581 [3] ISSP Research Group: International Social Survey Programme: Religion IV -  
582 ISSP 2018. GESIS Data Archive (2020). <https://doi.org/10.4232/1.13629>
- 583 [4] SSM2015 Research Group: 2015 Social Stratification and Social Mobility Survey.  
584 <https://www.l.u-tokyo.ac.jp/2015SSM-PJ/> (2015)
- 585 [5] Nakazawa, W.: A latent structure analysis of intergenerational educational mobil-  
586 ity. Japanese Sociological Review **61**(2), 112–129 (2010) [https://doi.org/10.4057/](https://doi.org/10.4057/jsr.61.112)  
587 [jsr.61.112](https://doi.org/10.4057/jsr.61.112)

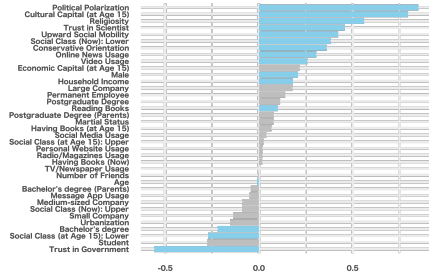

(a) Effects of explanatory variables on conspiracy theory **Recognition** by Sequential GLM model.

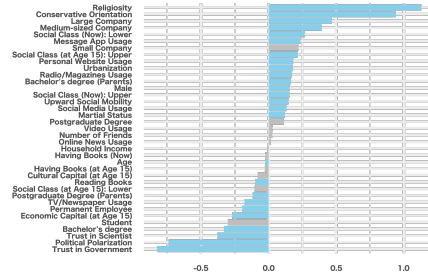

(b) Effects of explanatory variables on conspiracy theory **Belief** by Sequential GLM model.

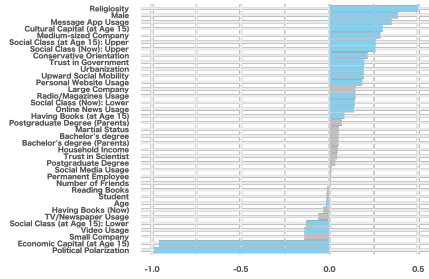

(c) Effects of explanatory variables on conspiracy theory **Demonstrative Action** by Sequential GLM model.

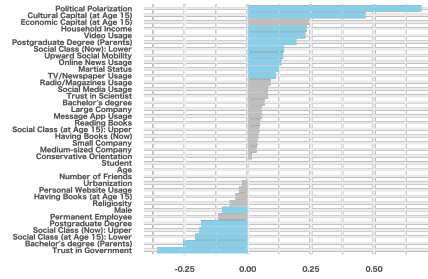

(d) Effects of explanatory variables on conspiracy theory **Diffusion Action** by Sequential GLM model.

**Fig. S34:** Effects of explanatory variables on conspiracy theory engagement in the U.S. by Sequential GLM model. Each bar represents the estimated effect of an explanatory variable. Bars shown in skyblue denote statistically significant effects with p-values below 0.05, while those in gray represent non-significant effects ( $p > 0.05$ ).

588 [6] NORC at the University of Chicago: General Social Survey, 2022. National  
589 Opinion Research Center, Chicago, IL (2022). <https://gss.norc.uchicago.edu/get-the-data>

590 [7] Santner, T.J., Duffy, D.E.: A note on a. albert and ja anderson's conditions  
591 for the existence of maximum likelihood estimates in logistic regression models.  
592 Biometrika **73**(3), 755–758 (1986)

593 [8] Zorn, C.: A solution to separation in binary response models. Political Analysis  
594 **13**(2), 157–170 (2005)

595 [9] Heinze, G., Schemper, M.: A solution to the problem of separation in logistic  
596 regression. Statistics in medicine **21**(16), 2409–2419 (2002)

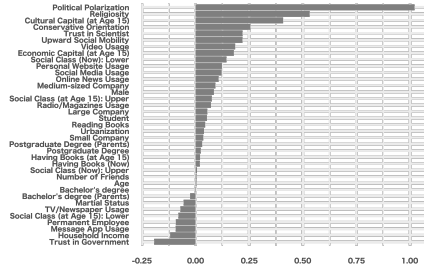

(a) Effects of explanatory variables on conspiracy theory **Recognition** by the SEM model.

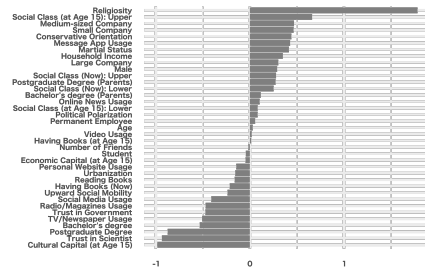

(b) Effects of explanatory variables on conspiracy theory **Belief** by the SEM model.

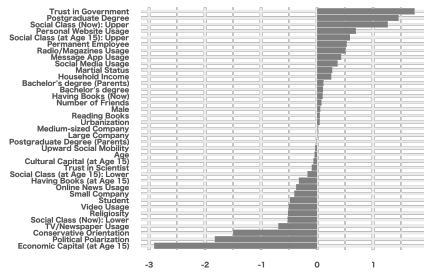

(c) Effects of explanatory variables on conspiracy theory **Demonstrative Action** by the SEM model.

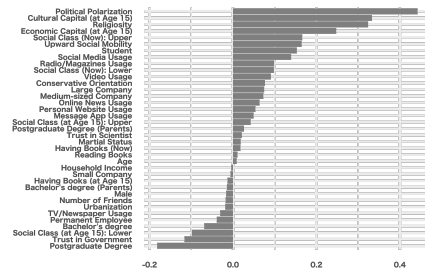

(d) Effects of explanatory variables on conspiracy theory **Diffusion Action** by the SEM model.

**Fig. S35:** Effects of explanatory variables on conspiracy theory engagement in Japan by the SEM model. Each bar represents the estimated effect of an explanatory variable. Bars shown in skyblue denote statistically significant effects with p-values below 0.05, while those in gray represent non-significant effects ( $p > 0.05$ ).

- 597 [10] Gelman, A., Jakulin, A., Pittau, M.G., Su, Y.-S.: A weakly informative default  
 598 prior distribution for logistic and other regression models. *The Annals of Applied*  
 599 *Statistics* **2**(4), 1360–1383 (2008) <https://doi.org/10.1214/08-AOAS191>
- 600 [11] Lord, F.M.: *Applications of Item Response Theory to Practical Testing Problems*.  
 601 Routledge, ??? (2012)
- 602 [12] Samejima, F.: Estimation of latent ability using a response pattern of graded  
 603 scores. *Psychometrika* **34**(S1), 1–97 (1969)

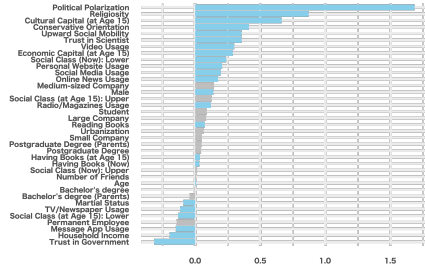

(a) Effects of explanatory variables on conspiracy theory **Recognition** by Sequential GLM model.

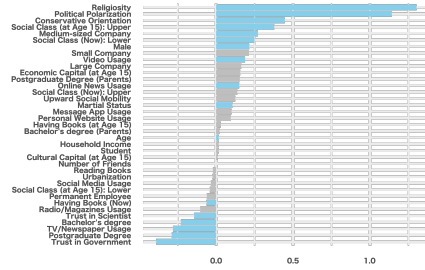

(b) Effects of explanatory variables on conspiracy theory **Belief** by Sequential GLM model.

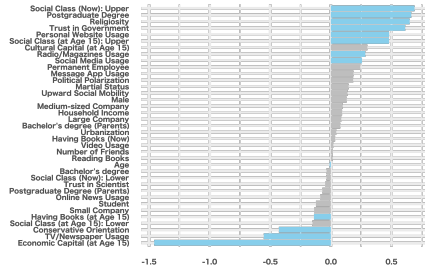

(c) Effects of explanatory variables on conspiracy theory **Demonstrative Action** by Sequential GLM model.

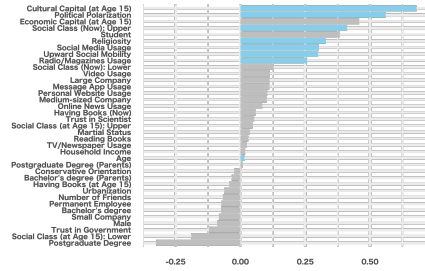

(d) Effects of explanatory variables on conspiracy theory **Diffusion Action** by Sequential GLM model.

**Fig. S36:** Effects of explanatory variables on conspiracy theory engagement in Japan by Sequential GLM model. Each bar represents the estimated effect of an explanatory variable. Bars shown in skyblue denote statistically significant effects with p-values below 0.05, while those in gray represent non-significant effects ( $p > 0.05$ ).

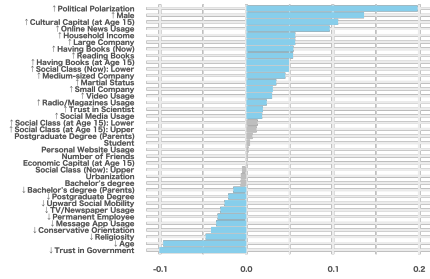

(a) Effects of explanatory variables on conspiracy theory **Recognition** by Hierarchical Zero-Inflated Binomial Model.

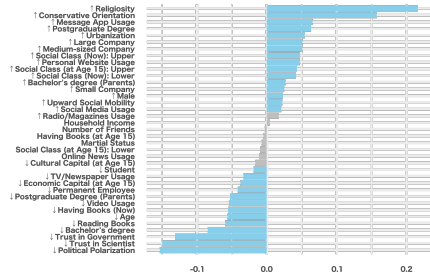

(b) Effects of explanatory variables on conspiracy theory **Belief** by Hierarchical Zero-Inflated Binomial Model.

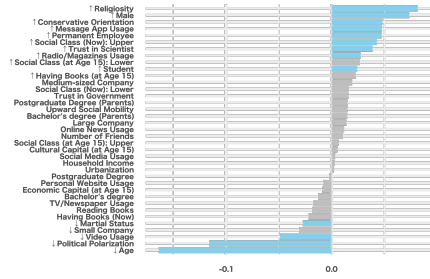

(c) Effects of explanatory variables on conspiracy theory **Demonstrative Action** by Hierarchical Zero-Inflated Binomial Model.

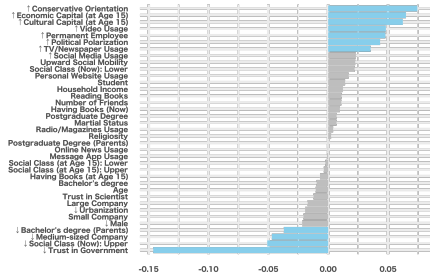

(d) Effects of explanatory variables on conspiracy theory **Diffusion Action** by Hierarchical Zero-Inflated Binomial Model.

**Fig. S37:** Effects of explanatory variables on conspiracy theory engagement in the U.S. by Hierarchical Zero-Inflated Binomial Model.

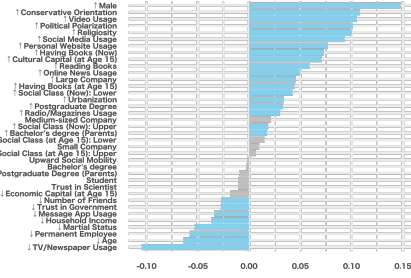

(a) Effects of explanatory variables on conspiracy theory **Recognition** by Hierarchical Zero-Inflated Binomial Model.

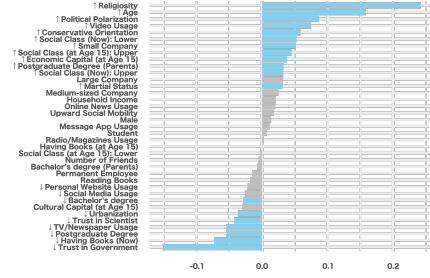

(b) Effects of explanatory variables on conspiracy theory **Belief** by Hierarchical Zero-Inflated Binomial Model.

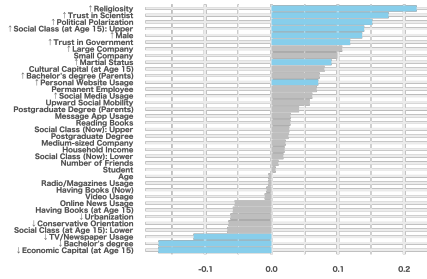

(c) Effects of explanatory variables on conspiracy theory **Demonstrative Action** by Hierarchical Zero-Inflated Binomial Model.

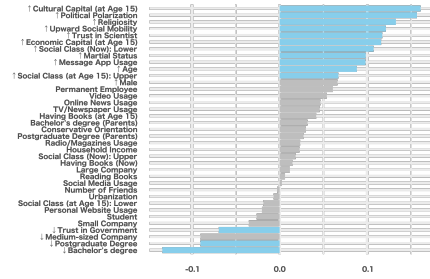

(d) Effects of explanatory variables on conspiracy theory **Diffusion Action** by Hierarchical Zero-Inflated Binomial Model.

**Fig. S38:** Effects of explanatory variables on conspiracy theory engagement in Japan by Hierarchical Zero-Inflated Binomial Model.



| Parameter                               | Estimate | SE    | l95CI  | u95CI  | Rhat  | Bulk_ESS  | Tail_ESS |
|-----------------------------------------|----------|-------|--------|--------|-------|-----------|----------|
| ↓Belief_Intercept                       | -2.958   | 0.023 | -3.003 | -2.913 | 1.000 | 11865.138 | 7684.515 |
| ↑Belief_Recognition                     | 0.285    | 0.003 | 0.279  | 0.290  | 1.000 | 14478.328 | 7542.041 |
| ↓Belief_Age                             | -0.056   | 0.010 | -0.075 | -0.037 | 1.000 | 12557.875 | 7677.667 |
| ↑Belief_Male                            | 0.023    | 0.008 | 0.007  | 0.039  | 1.001 | 15726.469 | 7879.976 |
| Belief_Martial Status                   | -0.007   | 0.008 | -0.023 | 0.009  | 1.000 | 17137.862 | 8001.453 |
| ↑Belief_Urbanization                    | 0.054    | 0.008 | 0.039  | 0.069  | 1.001 | 19683.782 | 7436.877 |
| ↓Belief_Bachelor's degree               | -0.084   | 0.010 | -0.104 | -0.064 | 1.000 | 12874.695 | 7828.926 |
| ↑Belief_Postgraduate Degree             | 0.063    | 0.010 | 0.044  | 0.083  | 1.000 | 12562.150 | 8192.098 |
| Belief_Household Income                 | 0.004    | 0.010 | -0.015 | 0.024  | 1.001 | 14219.179 | 7112.571 |
| ↓Belief_Student                         | -0.019   | 0.008 | -0.035 | -0.003 | 1.000 | 17553.922 | 6903.657 |
| ↓Belief_Permanent Employee              | -0.041   | 0.014 | -0.069 | -0.013 | 1.000 | 6487.379  | 8151.067 |
| ↑Belief_Large Company                   | 0.051    | 0.012 | 0.028  | 0.074  | 1.000 | 6188.712  | 7337.324 |
| ↑Belief_Medium-sized Company            | 0.051    | 0.014 | 0.024  | 0.078  | 1.000 | 5816.347  | 7532.272 |
| ↑Belief_Small Company                   | 0.025    | 0.011 | 0.004  | 0.047  | 1.000 | 6732.799  | 8174.570 |
| ↓Belief_Political Polarization          | -0.153   | 0.009 | -0.170 | -0.136 | 1.001 | 17293.509 | 7680.356 |
| ↑Belief_Conservative Orientation        | 0.157    | 0.008 | 0.142  | 0.173  | 1.001 | 14658.092 | 7008.746 |
| ↓Belief_Trust in Government             | -0.131   | 0.010 | -0.151 | -0.111 | 1.000 | 15033.736 | 8384.088 |
| ↓Belief_Trust in Scientist              | -0.150   | 0.008 | -0.166 | -0.133 | 1.000 | 13844.524 | 7718.980 |
| ↑Belief_Religiosity                     | 0.216    | 0.009 | 0.198  | 0.234  | 1.000 | 18248.378 | 7914.407 |
| ↑Belief_Social Media Usage              | 0.021    | 0.009 | 0.004  | 0.038  | 1.000 | 15685.348 | 8046.212 |
| ↓Belief_Video Usage                     | -0.054   | 0.009 | -0.071 | -0.037 | 1.000 | 17144.337 | 7740.037 |
| ↓Belief_TV/Newspaper Usage              | -0.033   | 0.009 | -0.051 | -0.015 | 1.000 | 16350.504 | 7781.211 |
| ↑Belief_Radio/Magazines Usage           | 0.017    | 0.009 | -0.001 | 0.036  | 1.001 | 13937.182 | 8140.697 |
| Belief_Online News Usage                | -0.011   | 0.009 | -0.029 | 0.007  | 1.000 | 15111.206 | 7378.913 |
| ↑Belief_Message App Usage               | 0.066    | 0.009 | 0.048  | 0.083  | 1.000 | 15112.647 | 7530.237 |
| ↑Belief_Personal Website Usage          | 0.047    | 0.008 | 0.031  | 0.064  | 1.001 | 16833.678 | 7292.396 |
| ↓Belief_Cultural Capital (at Age 15)    | -0.016   | 0.010 | -0.035 | 0.003  | 1.000 | 12849.679 | 8138.872 |
| ↓Belief_Economic Capital (at Age 15)    | -0.038   | 0.009 | -0.056 | -0.019 | 1.000 | 12929.743 | 7780.720 |
| Belief_Having Books (at Age 15)         | -0.004   | 0.009 | -0.021 | 0.013  | 1.000 | 16208.546 | 7713.180 |
| ↓Belief_Having Books (Now)              | -0.055   | 0.010 | -0.074 | -0.036 | 1.000 | 13844.024 | 8516.232 |
| ↓Belief_Reading Books                   | -0.059   | 0.009 | -0.077 | -0.042 | 1.001 | 15640.367 | 8064.367 |
| Belief_Number of Friends                | -0.003   | 0.006 | -0.016 | 0.009  | 1.000 | 16327.446 | 6324.614 |
| ↑Belief_Bachelor's degree (Parents)     | 0.027    | 0.010 | 0.008  | 0.047  | 1.000 | 11208.617 | 7789.947 |
| ↓Belief_Postgraduate Degree (Parents)   | -0.052   | 0.010 | -0.073 | -0.032 | 1.000 | 11477.731 | 7710.223 |
| ↑Belief_Social Class (Now): Upper       | 0.048    | 0.009 | 0.029  | 0.066  | 1.000 | 12129.954 | 8602.092 |
| ↑Belief_Social Class (Now): Lower       | 0.042    | 0.009 | 0.024  | 0.060  | 1.000 | 11271.894 | 8112.675 |
| ↑Belief_Social Class (at Age 15): Upper | 0.043    | 0.009 | 0.026  | 0.060  | 1.000 | 13715.942 | 7396.693 |
| Belief_Social Class (at Age 15): Lower  | -0.009   | 0.009 | -0.028 | 0.009  | 1.000 | 12101.600 | 8219.672 |
| ↑Belief_Upward Social Mobility          | 0.022    | 0.010 | 0.002  | 0.042  | 1.000 | 10429.781 | 7998.580 |

**Table S18:** Parameter Estimates for Belief by **Hierarchical Zero-Inflated Binomial Model** in the U.S. This table presents the Bayesian estimation results for each parameter. The Parameter column indicates the variable name, Estimate shows the median of the posterior distribution (Posterior Median), SE is the standard error, and l95CI and u95CI indicate the lower and upper bounds of the 95% credible interval. Rhat is the convergence diagnostic, with values close to 1 indicating good convergence. Bulk\_ESS and Tail\_ESS represent the effective sample size for bulk and tail portions of the posterior distribution. Furthermore, parameters marked with ↑ indicate significant positive effects ( $P(\beta > 0) > 0.95$ ), while ↓ indicates significant negative effects ( $P(\beta < 0) > 0.95$ ).

| Parameter                                      | Estimate | SE    | l95CI  | u95CI  | Rhat  | Bulk_ESS  | Tail_ESS |
|------------------------------------------------|----------|-------|--------|--------|-------|-----------|----------|
| ↓Demonstrative Intercept                       | -3.638   | 0.027 | -3.690 | -3.586 | 1.001 | 8908.059  | 7348.838 |
| ↑Demonstrative Belief                          | 0.506    | 0.005 | 0.496  | 0.515  | 1.001 | 10511.649 | 7926.870 |
| ↓Demonstrative Age                             | -0.163   | 0.015 | -0.193 | -0.134 | 1.000 | 12356.287 | 8062.839 |
| ↑Demonstrative Male                            | 0.073    | 0.013 | 0.049  | 0.098  | 1.001 | 15121.213 | 7686.046 |
| ↓Demonstrative Martial Status                  | -0.027   | 0.013 | -0.052 | -0.002 | 1.000 | 14429.913 | 7199.211 |
| Demonstrative Urbanization                     | 0.002    | 0.012 | -0.020 | 0.025  | 1.002 | 15732.415 | 7849.922 |
| Demonstrative Bachelor's degree                | -0.013   | 0.015 | -0.043 | 0.017  | 1.000 | 11600.619 | 8225.055 |
| Demonstrative Postgraduate Degree              | -0.002   | 0.014 | -0.030 | 0.025  | 1.000 | 11466.866 | 8610.780 |
| Demonstrative Household Income                 | 0.003    | 0.014 | -0.024 | 0.030  | 1.000 | 15824.922 | 8159.891 |
| ↑Demonstrative Student                         | 0.024    | 0.012 | 0.001  | 0.047  | 1.001 | 17535.527 | 7499.239 |
| ↑Demonstrative Permanent Employee              | 0.047    | 0.022 | 0.005  | 0.091  | 1.000 | 6204.392  | 7352.259 |
| Demonstrative Large Company                    | 0.014    | 0.018 | -0.022 | 0.050  | 1.000 | 6201.015  | 7107.980 |
| Demonstrative Medium-sized Company             | 0.019    | 0.021 | -0.022 | 0.059  | 1.000 | 5862.976  | 7381.068 |
| ↓Demonstrative Small Company                   | -0.031   | 0.017 | -0.065 | 0.003  | 1.000 | 6450.546  | 7546.354 |
| ↓Demonstrative Political Polarization          | -0.115   | 0.014 | -0.143 | -0.088 | 1.000 | 15806.540 | 7616.784 |
| ↑Demonstrative Conservative Orientation        | 0.048    | 0.012 | 0.025  | 0.071  | 1.001 | 16057.718 | 7708.328 |
| Demonstrative Trust in Government              | 0.016    | 0.015 | -0.013 | 0.045  | 1.000 | 13426.363 | 8007.024 |
| ↑Demonstrative Trust in Scientist              | 0.039    | 0.013 | 0.012  | 0.065  | 1.000 | 14755.629 | 8046.279 |
| ↑Demonstrative Religiosity                     | 0.081    | 0.014 | 0.054  | 0.108  | 1.001 | 16100.992 | 7710.131 |
| Demonstrative Social Media Usage               | 0.003    | 0.014 | -0.025 | 0.031  | 1.000 | 14379.824 | 7412.447 |
| ↓Demonstrative Video Usage                     | -0.049   | 0.014 | -0.076 | -0.022 | 1.000 | 16008.167 | 7949.916 |
| Demonstrative TV/Newspaper Usage               | -0.017   | 0.014 | -0.045 | 0.010  | 1.000 | 13443.475 | 7656.887 |
| ↑Demonstrative Radio/Magazines Usage           | 0.028    | 0.014 | 0.000  | 0.055  | 1.001 | 14623.368 | 8100.279 |
| Demonstrative Online News Usage                | 0.012    | 0.014 | -0.016 | 0.040  | 1.000 | 14677.879 | 7792.276 |
| ↑Demonstrative Message App Usage               | 0.047    | 0.014 | 0.020  | 0.074  | 1.000 | 14858.651 | 8774.492 |
| Demonstrative Personal Website Usage           | -0.008   | 0.013 | -0.032 | 0.017  | 1.001 | 16269.998 | 7128.956 |
| Demonstrative Cultural Capital (at Age 15)     | 0.006    | 0.014 | -0.023 | 0.034  | 1.000 | 11487.463 | 7807.569 |
| Demonstrative Economic Capital (at Age 15)     | -0.009   | 0.013 | -0.035 | 0.017  | 1.000 | 11583.097 | 7485.252 |
| ↑Demonstrative Having Books (at Age 15)        | 0.023    | 0.012 | -0.001 | 0.047  | 1.000 | 14845.926 | 7617.673 |
| Demonstrative Having Books (Now)               | -0.022   | 0.015 | -0.051 | 0.008  | 1.001 | 15118.420 | 8508.149 |
| Demonstrative Reading Books                    | -0.018   | 0.014 | -0.047 | 0.010  | 1.000 | 15954.765 | 7423.916 |
| Demonstrative Number of Friends                | 0.011    | 0.007 | -0.004 | 0.024  | 1.001 | 17619.265 | 6407.493 |
| Demonstrative Bachelor's degree (Parents)      | 0.015    | 0.014 | -0.013 | 0.043  | 1.001 | 11906.535 | 7991.339 |
| Demonstrative Postgraduate Degree (Parents)    | 0.015    | 0.015 | -0.015 | 0.045  | 1.000 | 11688.130 | 8294.150 |
| ↑Demonstrative Social Class (Now): Upper       | 0.043    | 0.014 | 0.016  | 0.070  | 1.000 | 11213.345 | 7977.374 |
| Demonstrative Social Class (Now): Lower        | 0.016    | 0.015 | -0.013 | 0.045  | 1.000 | 12900.443 | 7450.915 |
| Demonstrative Social Class (at Age 15): Upper  | 0.007    | 0.013 | -0.018 | 0.032  | 1.000 | 12893.502 | 8412.415 |
| ↑Demonstrative Social Class (at Age 15): Lower | 0.027    | 0.015 | -0.002 | 0.055  | 1.000 | 11786.859 | 8860.473 |
| Demonstrative Upward Social Mobility           | 0.015    | 0.015 | -0.015 | 0.045  | 1.000 | 10190.396 | 8363.550 |

**Table S19:** Parameter Estimates for Demonstrative Action by **Hierarchical Zero-Inflated Binomial Model** in the U.S. This table presents the Bayesian estimation results for each parameter. The Parameter column indicates the variable name, Estimate shows the median of the posterior distribution (Posterior Median), SE is the standard error, and l95CI and u95CI indicate the lower and upper bounds of the 95% credible interval. Rhat is the convergence diagnostic, with values close to 1 indicating good convergence. Bulk\_ESS and Tail\_ESS represent the effective sample size for bulk and tail portions of the posterior distribution. Furthermore, parameters marked with ↑ indicate significant positive effects ( $P(\beta > 0) > 0.95$ ), while ↓ indicates significant negative effects ( $P(\beta < 0) > 0.95$ ).

| Parameter                                 | Estimate | SE    | l95CI  | u95CI  | Rhat  | Bulk_ESS  | Tail_ESS |
|-------------------------------------------|----------|-------|--------|--------|-------|-----------|----------|
| ↓Diffusion Intercept                      | -3.359   | 0.025 | -3.407 | -3.311 | 1.001 | 9310.248  | 7635.782 |
| ↑Diffusion Belief                         | 0.449    | 0.005 | 0.440  | 0.458  | 1.001 | 10712.980 | 8595.735 |
| Diffusion Age                             | -0.010   | 0.014 | -0.039 | 0.017  | 1.000 | 13679.539 | 7916.694 |
| ↓Diffusion Male                           | -0.022   | 0.012 | -0.046 | 0.003  | 1.000 | 14899.416 | 7951.278 |
| Diffusion Martial Status                  | 0.007    | 0.012 | -0.017 | 0.031  | 1.001 | 15465.358 | 8111.545 |
| ↓Diffusion Urbanization                   | -0.019   | 0.012 | -0.042 | 0.004  | 1.001 | 17150.315 | 6819.988 |
| Diffusion Bachelor's degree               | -0.010   | 0.014 | -0.037 | 0.018  | 1.000 | 12397.883 | 8271.878 |
| Diffusion Postgraduate Degree             | 0.007    | 0.015 | -0.021 | 0.036  | 1.000 | 13887.417 | 7863.465 |
| Diffusion Household Income                | 0.012    | 0.014 | -0.016 | 0.041  | 1.000 | 14034.824 | 7956.289 |
| Diffusion Student                         | 0.014    | 0.012 | -0.009 | 0.037  | 1.000 | 17978.141 | 7623.874 |
| ↑Diffusion Permanent Employee             | 0.048    | 0.021 | 0.006  | 0.089  | 1.001 | 6228.143  | 7642.584 |
| Diffusion Large Company                   | -0.017   | 0.017 | -0.050 | 0.017  | 1.001 | 5926.907  | 7200.756 |
| ↓Diffusion Medium-sized Company           | -0.047   | 0.021 | -0.087 | -0.007 | 1.001 | 5684.904  | 7360.974 |
| Diffusion Small Company                   | -0.021   | 0.017 | -0.053 | 0.012  | 1.001 | 6618.929  | 7795.623 |
| ↑Diffusion Political Polarization         | 0.043    | 0.012 | 0.019  | 0.067  | 1.000 | 17492.914 | 7032.112 |
| ↑Diffusion Conservative Orientation       | 0.075    | 0.012 | 0.050  | 0.099  | 1.000 | 16312.063 | 7572.338 |
| ↓Diffusion Trust in Government            | -0.146   | 0.015 | -0.176 | -0.116 | 1.001 | 13640.245 | 7551.333 |
| Diffusion Trust in Scientist              | -0.012   | 0.012 | -0.037 | 0.012  | 1.001 | 14494.764 | 7479.637 |
| Diffusion Religiosity                     | 0.002    | 0.013 | -0.024 | 0.029  | 1.000 | 15405.499 | 7224.709 |
| ↑Diffusion Social Media Usage             | 0.023    | 0.013 | -0.002 | 0.049  | 1.001 | 17233.135 | 7973.086 |
| ↑Diffusion Video Usage                    | 0.048    | 0.013 | 0.021  | 0.074  | 1.000 | 16208.268 | 6997.797 |
| ↑Diffusion TV/Newspaper Usage             | 0.035    | 0.013 | 0.010  | 0.061  | 1.000 | 14888.781 | 8009.055 |
| Diffusion Radio/Magazines Usage           | 0.004    | 0.013 | -0.022 | 0.031  | 1.001 | 14090.591 | 7744.581 |
| Diffusion Online News Usage               | 0.000    | 0.013 | -0.026 | 0.025  | 1.000 | 14943.919 | 7764.966 |
| Diffusion Message App Usage               | -0.001   | 0.013 | -0.027 | 0.025  | 1.000 | 15714.247 | 8172.706 |
| Diffusion Personal Website Usage          | 0.017    | 0.013 | -0.008 | 0.042  | 1.000 | 15877.945 | 7273.593 |
| ↑Diffusion Cultural Capital (at Age 15)   | 0.062    | 0.014 | 0.034  | 0.090  | 1.000 | 12387.009 | 7522.691 |
| ↑Diffusion Economic Capital (at Age 15)   | 0.065    | 0.015 | 0.036  | 0.095  | 1.000 | 12554.387 | 7556.559 |
| Diffusion Having Books (at Age 15)        | -0.007   | 0.013 | -0.032 | 0.018  | 1.000 | 15238.985 | 7764.673 |
| Diffusion Having Books (Now)              | 0.010    | 0.014 | -0.017 | 0.037  | 1.000 | 13984.660 | 8479.389 |
| Diffusion Reading Books                   | 0.011    | 0.013 | -0.015 | 0.037  | 1.000 | 15598.180 | 8357.120 |
| Diffusion Number of Friends               | 0.011    | 0.009 | -0.008 | 0.026  | 1.001 | 17238.171 | 5615.651 |
| ↓Diffusion Bachelor's degree (Parents)    | -0.037   | 0.015 | -0.067 | -0.007 | 1.001 | 12124.248 | 8328.809 |
| Diffusion Postgraduate Degree (Parents)   | 0.000    | 0.015 | -0.030 | 0.030  | 1.001 | 11552.834 | 7776.400 |
| ↓Diffusion Social Class (Now): Upper      | -0.051   | 0.015 | -0.080 | -0.022 | 1.000 | 13105.019 | 8136.210 |
| Diffusion Social Class (Now): Lower       | 0.022    | 0.014 | -0.006 | 0.049  | 1.000 | 13255.644 | 7545.845 |
| Diffusion Social Class (at Age 15): Upper | -0.004   | 0.013 | -0.030 | 0.022  | 1.000 | 14555.902 | 8492.321 |
| Diffusion Social Class (at Age 15): Lower | -0.002   | 0.014 | -0.031 | 0.026  | 1.000 | 12357.674 | 7634.740 |
| Diffusion Upward Social Mobility          | 0.023    | 0.015 | -0.007 | 0.052  | 1.000 | 10974.510 | 7954.909 |
| ↑Diffusion Y21                            | 0.449    | 0.005 | 0.440  | 0.458  | 1.001 | 10712.980 | 8595.735 |

**Table S20:** Parameter Estimates for Diffusion Action by **Hierarchical Zero-Inflated Binomial Model** in the U.S. This table presents the Bayesian estimation results for each parameter. The Parameter column indicates the variable name, Estimate shows the median of the posterior distribution (Posterior Median), SE is the standard error, and l95CI and u95CI indicate the lower and upper bounds of the 95% credible interval. Rhat is the convergence diagnostic, with values close to 1 indicating good convergence. Bulk\_ESS and Tail\_ESS represent the effective sample size for bulk and tail portions of the posterior distribution. Furthermore, parameters marked with ↑ indicate significant positive effects ( $P(\beta > 0) > 0.95$ ), while ↓ indicates significant negative effects ( $P(\beta < 0) > 0.95$ ).

| Parameter                                    | Estimate | SE    | l95CI  | u95CI  | Rhat  | Bulk_ESS  | Tail_ESS |
|----------------------------------------------|----------|-------|--------|--------|-------|-----------|----------|
| ↓Recognition_Intercept                       | -0.760   | 0.008 | -0.775 | -0.744 | 1.001 | 15435.205 | 7811.411 |
| ↓Recognition_Age                             | -0.064   | 0.009 | -0.083 | -0.046 | 1.000 | 12956.487 | 8532.960 |
| ↑Recognition_Male                            | 0.148    | 0.009 | 0.131  | 0.165  | 1.000 | 14100.807 | 8323.978 |
| ↓Recognition_Martial Status                  | -0.053   | 0.008 | -0.069 | -0.037 | 1.001 | 14288.657 | 7777.508 |
| ↑Recognition_Urbanization                    | 0.034    | 0.007 | 0.020  | 0.048  | 1.000 | 17244.459 | 7587.718 |
| Recognition_Bachelor's degree                | -0.003   | 0.008 | -0.019 | 0.013  | 1.000 | 15645.760 | 7470.286 |
| ↑Recognition_Postgraduate Degree             | 0.033    | 0.007 | 0.020  | 0.046  | 1.001 | 17236.934 | 7658.424 |
| ↓Recognition_Household Income                | -0.037   | 0.010 | -0.057 | -0.017 | 1.000 | 13583.333 | 7825.973 |
| Recognition_Student                          | -0.011   | 0.007 | -0.024 | 0.003  | 1.001 | 20236.425 | 7255.951 |
| ↓Recognition_Permanent Employee              | -0.058   | 0.017 | -0.091 | -0.024 | 1.000 | 4719.750  | 6792.694 |
| ↑Recognition_Large Company                   | 0.046    | 0.013 | 0.021  | 0.071  | 1.001 | 4658.271  | 6509.486 |
| Recognition_Medium-sized Company             | 0.021    | 0.014 | -0.005 | 0.049  | 1.000 | 4734.802  | 6870.708 |
| Recognition_Small Company                    | 0.010    | 0.014 | -0.018 | 0.038  | 1.000 | 4566.166  | 6691.674 |
| ↑Recognition_Political Polarization          | 0.101    | 0.007 | 0.088  | 0.114  | 1.000 | 16962.494 | 7092.677 |
| ↑Recognition_Conservative Orientation        | 0.108    | 0.007 | 0.094  | 0.122  | 1.001 | 16439.764 | 8019.104 |
| ↓Recognition_Trust in Government             | -0.028   | 0.008 | -0.044 | -0.012 | 1.000 | 13870.058 | 8063.756 |
| Recognition_Trust in Scientist               | -0.011   | 0.008 | -0.027 | 0.005  | 1.000 | 14614.293 | 8042.822 |
| ↑Recognition_Religiosity                     | 0.100    | 0.007 | 0.087  | 0.114  | 1.000 | 16022.017 | 7886.841 |
| ↑Recognition_Social Media Usage              | 0.093    | 0.008 | 0.078  | 0.109  | 1.001 | 17064.353 | 7562.795 |
| ↑Recognition_Video Usage                     | 0.105    | 0.008 | 0.089  | 0.120  | 1.000 | 17591.775 | 7708.467 |
| ↓Recognition_TV/Newspaper Usage              | -0.105   | 0.007 | -0.119 | -0.090 | 1.001 | 17007.762 | 6422.406 |
| ↑Recognition_Radio/Magazines Usage           | 0.030    | 0.007 | 0.016  | 0.044  | 1.000 | 17046.110 | 7638.044 |
| ↑Recognition_Online News Usage               | 0.050    | 0.007 | 0.036  | 0.065  | 1.000 | 17192.017 | 7546.110 |
| ↓Recognition_Message App Usage               | -0.034   | 0.008 | -0.049 | -0.019 | 1.000 | 16264.705 | 8378.168 |
| ↑Recognition_Personal Website Usage          | 0.077    | 0.007 | 0.064  | 0.090  | 1.000 | 15314.432 | 7912.518 |
| ↑Recognition_Cultural Capital (at Age 15)    | 0.071    | 0.011 | 0.050  | 0.091  | 1.000 | 10263.581 | 8012.232 |
| ↓Recognition_Economic Capital (at Age 15)    | -0.018   | 0.011 | -0.040 | 0.003  | 1.000 | 10492.370 | 8391.375 |
| ↑Recognition_Having Books (at Age 15)        | 0.044    | 0.008 | 0.029  | 0.059  | 1.000 | 14685.063 | 8103.102 |
| ↑Recognition_Having Books (Now)              | 0.073    | 0.008 | 0.057  | 0.089  | 1.000 | 12183.077 | 7877.878 |
| ↑Recognition_Reading Books                   | 0.059    | 0.008 | 0.044  | 0.074  | 1.000 | 15395.014 | 8284.145 |
| ↓Recognition_Number of Friends               | -0.027   | 0.012 | -0.052 | -0.006 | 1.000 | 15538.930 | 7568.948 |
| ↑Recognition_Bachelor's degree (Parents)     | 0.017    | 0.008 | 0.002  | 0.032  | 1.001 | 17892.258 | 7601.803 |
| Recognition_Postgraduate Degree (Parents)    | -0.009   | 0.007 | -0.022 | 0.004  | 1.000 | 19604.158 | 8277.119 |
| ↑Recognition_Social Class (Now): Upper       | 0.019    | 0.008 | 0.004  | 0.033  | 1.001 | 15376.645 | 8174.275 |
| ↑Recognition_Social Class (Now): Lower       | 0.042    | 0.008 | 0.026  | 0.059  | 1.000 | 12275.404 | 8825.543 |
| Recognition_Social Class (at Age 15): Upper  | 0.007    | 0.007 | -0.008 | 0.021  | 1.000 | 14485.151 | 7908.020 |
| ↑Recognition_Social Class (at Age 15): Lower | 0.015    | 0.009 | -0.003 | 0.032  | 1.000 | 12610.860 | 7711.897 |
| Recognition_Upward Social Mobility           | -0.002   | 0.009 | -0.019 | 0.015  | 1.001 | 11480.661 | 8259.438 |

**Table S21:** Parameter Estimates for Recognition by **Hierarchical Zero-Inflated Binomial Model** in Japan. This table presents the Bayesian estimation results for each parameter. The Parameter column indicates the variable name, Estimate shows the median of the posterior distribution (Posterior Median), SE is the standard error, and l95CI and u95CI indicate the lower and upper bounds of the 95% credible interval. Rhat is the convergence diagnostic, with values close to 1 indicating good convergence. Bulk\_ESS and Tail\_ESS represent the effective sample size for bulk and tail portions of the posterior distribution. Furthermore, parameters marked with ↑ indicate significant positive effects ( $P(\beta > 0) > 0.95$ ), while ↓ indicates significant negative effects ( $P(\beta < 0) > 0.95$ ).

| Parameter                               | Estimate | SE    | l95CI  | u95CI  | Rhat  | Bulk_ESS  | Tail_ESS |
|-----------------------------------------|----------|-------|--------|--------|-------|-----------|----------|
| ↓Belief_Intercept                       | -3.880   | 0.028 | -3.934 | -3.825 | 1.000 | 7830.626  | 8057.627 |
| ↑Belief_Recognition                     | 0.385    | 0.004 | 0.377  | 0.394  | 1.000 | 9573.489  | 8355.763 |
| ↑Belief_Age                             | 0.158    | 0.017 | 0.124  | 0.191  | 1.000 | 10613.604 | 7796.266 |
| Belief_Male                             | 0.014    | 0.016 | -0.017 | 0.045  | 1.000 | 12190.777 | 6848.491 |
| ↑Belief_Martial Status                  | 0.031    | 0.015 | 0.003  | 0.060  | 1.000 | 13575.203 | 8519.982 |
| ↓Belief_Urbanization                    | -0.037   | 0.013 | -0.063 | -0.011 | 1.000 | 16642.344 | 7180.194 |
| ↓Belief_Bachelor's degree               | -0.029   | 0.015 | -0.058 | 0.000  | 1.000 | 15859.640 | 7743.829 |
| ↓Belief_Postgraduate Degree             | -0.054   | 0.014 | -0.082 | -0.026 | 1.001 | 15017.468 | 7930.373 |
| Belief_Household Income                 | 0.021    | 0.017 | -0.013 | 0.054  | 1.000 | 14792.333 | 8026.410 |
| Belief_Student                          | 0.007    | 0.015 | -0.022 | 0.035  | 1.000 | 15791.523 | 7314.679 |
| Belief_Permanent Employee               | -0.015   | 0.029 | -0.073 | 0.042  | 1.000 | 4660.967  | 7361.095 |
| Belief_Large Company                    | 0.032    | 0.022 | -0.010 | 0.075  | 1.000 | 4554.048  | 7291.255 |
| Belief_Medium-sized Company             | 0.025    | 0.024 | -0.022 | 0.072  | 1.000 | 4412.397  | 6548.470 |
| ↑Belief_Small Company                   | 0.052    | 0.025 | 0.003  | 0.101  | 1.000 | 4624.742  | 7387.522 |
| ↑Belief_Political Polarization          | 0.087    | 0.012 | 0.064  | 0.110  | 1.000 | 17106.600 | 8053.566 |
| ↑Belief_Conservative Orientation        | 0.058    | 0.013 | 0.033  | 0.083  | 1.000 | 14133.104 | 7608.608 |
| ↓Belief_Trust in Government             | -0.151   | 0.016 | -0.184 | -0.119 | 1.001 | 13128.189 | 8122.304 |
| ↓Belief_Trust in Scientist              | -0.042   | 0.014 | -0.071 | -0.014 | 1.001 | 12318.753 | 7706.136 |
| ↑Belief_Religiosity                     | 0.242    | 0.012 | 0.218  | 0.265  | 1.000 | 14739.015 | 7098.636 |
| ↓Belief_Social Media Usage              | -0.026   | 0.014 | -0.054 | 0.001  | 1.000 | 15037.579 | 7559.398 |
| ↑Belief_Video Usage                     | 0.075    | 0.014 | 0.046  | 0.103  | 1.000 | 16477.515 | 8012.416 |
| ↓Belief_TV/Newspaper Usage              | -0.054   | 0.013 | -0.080 | -0.029 | 1.000 | 16564.081 | 7731.502 |
| Belief_Radio/Magazines Usage            | 0.003    | 0.013 | -0.023 | 0.029  | 1.000 | 14948.339 | 7581.957 |
| Belief_Online News Usage                | 0.020    | 0.013 | -0.006 | 0.047  | 1.001 | 15511.093 | 7982.803 |
| Belief_Message App Usage                | 0.012    | 0.014 | -0.015 | 0.040  | 1.000 | 14555.925 | 7877.215 |
| ↓Belief_Personal Website Usage          | -0.022   | 0.012 | -0.047 | 0.002  | 1.001 | 15729.466 | 7507.319 |
| Belief_Cultural Capital (at Age 15)     | -0.030   | 0.019 | -0.067 | 0.007  | 1.000 | 10732.843 | 7719.548 |
| ↑Belief_Economic Capital (at Age 15)    | 0.038    | 0.019 | 0.001  | 0.075  | 1.001 | 10580.830 | 7751.442 |
| Belief_Having Books (at Age 15)         | 0.000    | 0.014 | -0.027 | 0.028  | 1.001 | 14006.622 | 7925.391 |
| ↓Belief_Having Books (Now)              | -0.073   | 0.015 | -0.103 | -0.043 | 1.000 | 11654.943 | 8246.231 |
| Belief_Reading Books                    | -0.018   | 0.014 | -0.047 | 0.009  | 1.001 | 17264.568 | 8010.261 |
| Belief_Number of Friends                | -0.005   | 0.019 | -0.044 | 0.034  | 1.000 | 16685.454 | 6537.666 |
| Belief_Bachelor's degree (Parents)      | -0.008   | 0.014 | -0.036 | 0.021  | 1.000 | 14480.502 | 7604.056 |
| ↑Belief_Postgraduate Degree (Parents)   | 0.033    | 0.012 | 0.008  | 0.056  | 1.000 | 15674.873 | 7605.728 |
| ↑Belief_Social Class (Now): Upper       | 0.032    | 0.013 | 0.006  | 0.058  | 1.000 | 13007.892 | 8226.255 |
| ↑Belief_Social Class (Now): Lower       | 0.053    | 0.015 | 0.024  | 0.083  | 1.000 | 11335.671 | 7895.978 |
| ↑Belief_Social Class (at Age 15): Upper | 0.045    | 0.012 | 0.020  | 0.069  | 1.000 | 15328.451 | 8124.328 |
| Belief_Social Class (at Age 15): Lower  | -0.003   | 0.015 | -0.034 | 0.027  | 1.000 | 11028.154 | 8628.934 |
| Belief_Upward Social Mobility           | 0.018    | 0.015 | -0.012 | 0.048  | 1.000 | 10150.726 | 8260.352 |

**Table S22:** Parameter Estimates for Belief by **Hierarchical Zero-Inflated Binomial Model** in Japan. This table presents the Bayesian estimation results for each parameter. The Parameter column indicates the variable name, Estimate shows the median of the posterior distribution (Posterior Median), SE is the standard error, and l95CI and u95CI indicate the lower and upper bounds of the 95% credible interval. Rhat is the convergence diagnostic, with values close to 1 indicating good convergence. Bulk\_ESS and Tail\_ESS represent the effective sample size for bulk and tail portions of the posterior distribution. Furthermore, parameters marked with ↑ indicate significant positive effects ( $P(\beta > 0) > 0.95$ ), while ↓ indicates significant negative effects ( $P(\beta < 0) > 0.95$ ).

| Parameter                                      | Estimate | SE    | l95CI  | u95CI  | Rhat  | Bulk_ESS  | Tail_ESS |
|------------------------------------------------|----------|-------|--------|--------|-------|-----------|----------|
| ↓Demonstrative Intercept                       | -4.826   | 0.083 | -4.989 | -4.662 | 1.000 | 6704.369  | 7851.600 |
| ↑Demonstrative Belief                          | 0.628    | 0.016 | 0.597  | 0.660  | 1.001 | 8522.635  | 8260.386 |
| Demonstrative Age                              | -0.004   | 0.046 | -0.094 | 0.085  | 1.000 | 10143.221 | 7855.894 |
| ↑Demonstrative Male                            | 0.137    | 0.040 | 0.057  | 0.218  | 1.000 | 12246.521 | 7055.585 |
| ↑Demonstrative Martial Status                  | 0.090    | 0.040 | 0.011  | 0.169  | 1.000 | 13492.024 | 8258.914 |
| ↓Demonstrative Urbanization                    | -0.062   | 0.034 | -0.128 | 0.005  | 1.001 | 16604.384 | 7569.494 |
| ↓Demonstrative Bachelor's degree               | -0.170   | 0.043 | -0.256 | -0.086 | 1.000 | 13251.525 | 7966.813 |
| Demonstrative Postgraduate Degree              | 0.025    | 0.030 | -0.034 | 0.084  | 1.000 | 13709.262 | 7975.570 |
| Demonstrative Household Income                 | 0.020    | 0.041 | -0.061 | 0.100  | 1.001 | 12428.572 | 7741.621 |
| Demonstrative Student                          | 0.006    | 0.029 | -0.051 | 0.061  | 1.000 | 13223.939 | 7762.774 |
| Demonstrative Permanent Employee               | 0.068    | 0.077 | -0.082 | 0.223  | 1.001 | 4340.128  | 7124.354 |
| ↑Demonstrative Large Company                   | 0.106    | 0.062 | -0.015 | 0.227  | 1.001 | 4185.540  | 6447.465 |
| Demonstrative Medium-sized Company             | 0.021    | 0.062 | -0.101 | 0.139  | 1.001 | 4086.419  | 6556.389 |
| Demonstrative Small Company                    | 0.099    | 0.066 | -0.031 | 0.228  | 1.001 | 4077.504  | 5498.042 |
| ↑Demonstrative Political Polarization          | 0.152    | 0.034 | 0.084  | 0.218  | 1.001 | 16051.718 | 7688.756 |
| ↓Demonstrative Conservative Orientation        | -0.065   | 0.036 | -0.136 | 0.006  | 1.001 | 14700.252 | 7932.870 |
| ↑Demonstrative Trust in Government             | 0.118    | 0.037 | 0.045  | 0.193  | 1.000 | 11085.777 | 7977.527 |
| ↑Demonstrative Trust in Scientist              | 0.176    | 0.041 | 0.097  | 0.255  | 1.000 | 12866.907 | 8355.152 |
| ↑Demonstrative Religiosity                     | 0.219    | 0.032 | 0.157  | 0.281  | 1.000 | 15068.458 | 8181.077 |
| ↑Demonstrative Social Media Usage              | 0.061    | 0.037 | -0.011 | 0.135  | 1.000 | 13380.755 | 8042.649 |
| Demonstrative Video Usage                      | -0.010   | 0.039 | -0.087 | 0.068  | 1.000 | 14607.362 | 8322.093 |
| ↓Demonstrative TV/Newspaper Usage              | -0.117   | 0.035 | -0.186 | -0.049 | 1.000 | 14381.489 | 8126.770 |
| Demonstrative Radio/Magazines Usage            | -0.005   | 0.035 | -0.074 | 0.064  | 1.000 | 13932.601 | 7883.423 |
| Demonstrative Online News Usage                | -0.055   | 0.037 | -0.128 | 0.016  | 1.001 | 14004.987 | 8397.625 |
| Demonstrative Message App Usage                | 0.029    | 0.036 | -0.041 | 0.099  | 1.001 | 14267.634 | 7767.496 |
| ↑Demonstrative Personal Website Usage          | 0.070    | 0.029 | 0.013  | 0.128  | 1.000 | 13184.107 | 8135.990 |
| Demonstrative Cultural Capital (at Age 15)     | 0.080    | 0.050 | -0.020 | 0.177  | 1.000 | 9625.872  | 8391.539 |
| ↓Demonstrative Economic Capital (at Age 15)    | -0.171   | 0.046 | -0.260 | -0.081 | 1.000 | 9356.306  | 8391.259 |
| Demonstrative Having Books (at Age 15)         | -0.058   | 0.038 | -0.134 | 0.017  | 1.000 | 14231.626 | 7542.617 |
| Demonstrative Having Books (Now)               | -0.007   | 0.040 | -0.085 | 0.070  | 1.000 | 10663.080 | 7870.986 |
| Demonstrative Reading Books                    | 0.028    | 0.039 | -0.047 | 0.103  | 1.000 | 12681.025 | 8578.393 |
| Demonstrative Number of Friends                | 0.010    | 0.064 | -0.116 | 0.139  | 1.001 | 16378.770 | 7677.201 |
| ↑Demonstrative Bachelor's degree (Parents)     | 0.072    | 0.038 | -0.002 | 0.146  | 1.001 | 13671.794 | 7969.320 |
| Demonstrative Postgraduate Degree (Parents)    | 0.042    | 0.026 | -0.010 | 0.091  | 1.000 | 14707.242 | 8068.733 |
| Demonstrative Social Class (Now): Upper        | 0.027    | 0.027 | -0.027 | 0.081  | 1.000 | 11404.239 | 8819.256 |
| Demonstrative Social Class (Now): Lower        | 0.018    | 0.044 | -0.068 | 0.104  | 1.000 | 10956.065 | 8291.264 |
| ↑Demonstrative Social Class (at Age 15): Upper | 0.140    | 0.029 | 0.082  | 0.197  | 1.000 | 10403.777 | 8291.443 |
| Demonstrative Social Class (at Age 15): Lower  | -0.067   | 0.044 | -0.154 | 0.020  | 1.000 | 10694.833 | 7919.596 |
| Demonstrative Upward Social Mobility           | 0.058    | 0.040 | -0.021 | 0.138  | 1.000 | 8789.299  | 8038.377 |

**Table S23:** Parameter Estimates for Demonstrative Action by **Hierarchical Zero-Inflated Binomial Model** in Japan. This table presents the Bayesian estimation results for each parameter. The Parameter column indicates the variable name, Estimate shows the median of the posterior distribution (Posterior Median), SE is the standard error, and l95CI and u95CI indicate the lower and upper bounds of the 95% credible interval. Rhat is the convergence diagnostic, with values close to 1 indicating good convergence. Bulk\_ESS and Tail\_ESS represent the effective sample size for bulk and tail portions of the posterior distribution. Furthermore, parameters marked with ↑ indicate significant positive effects ( $P(\beta > 0) > 0.95$ ), while ↓ indicates significant negative effects ( $P(\beta < 0) > 0.95$ ).

| Parameter                                  | Estimate | SE    | l95CI  | u95CI  | Rhat  | Bulk_ESS  | Tail_ESS |
|--------------------------------------------|----------|-------|--------|--------|-------|-----------|----------|
| ↓Diffusion_Intercept                       | -4.795   | 0.064 | -4.921 | -4.672 | 1.000 | 6980.301  | 7198.846 |
| ↑Diffusion_Belief                          | 0.673    | 0.013 | 0.647  | 0.699  | 1.000 | 8331.153  | 7871.506 |
| ↑Diffusion_Age                             | 0.088    | 0.038 | 0.013  | 0.164  | 1.000 | 10560.595 | 7168.136 |
| ↑Diffusion_Male                            | 0.066    | 0.035 | -0.002 | 0.135  | 1.000 | 12568.816 | 8094.769 |
| ↑Diffusion_Martial Status                  | 0.098    | 0.033 | 0.035  | 0.163  | 1.000 | 14822.667 | 8286.694 |
| Diffusion_Urbanization                     | -0.007   | 0.029 | -0.063 | 0.049  | 1.000 | 18229.706 | 7478.946 |
| ↓Diffusion_Bachelor's degree               | -0.134   | 0.034 | -0.200 | -0.068 | 1.000 | 14295.729 | 7536.013 |
| ↓Diffusion_Postgraduate Degree             | -0.090   | 0.032 | -0.153 | -0.029 | 1.000 | 15336.048 | 7426.031 |
| Diffusion_Household Income                 | 0.023    | 0.037 | -0.050 | 0.095  | 1.000 | 12798.723 | 7801.290 |
| Diffusion_Student                          | -0.026   | 0.033 | -0.094 | 0.037  | 1.000 | 14714.090 | 7130.350 |
| Diffusion_Permanent Employee               | 0.061    | 0.065 | -0.063 | 0.188  | 1.000 | 4763.467  | 6248.059 |
| Diffusion_Large Company                    | 0.012    | 0.049 | -0.085 | 0.106  | 1.000 | 4588.394  | 6201.758 |
| ↓Diffusion_Medium-sized Company            | -0.090   | 0.054 | -0.199 | 0.014  | 1.000 | 4525.443  | 6795.575 |
| Diffusion_Small Company                    | -0.035   | 0.057 | -0.148 | 0.074  | 1.000 | 4612.183  | 6379.502 |
| ↑Diffusion_Political Polarization          | 0.157    | 0.025 | 0.107  | 0.206  | 1.000 | 13251.575 | 7664.814 |
| Diffusion_Conservative Orientation         | 0.030    | 0.029 | -0.027 | 0.088  | 1.000 | 15252.312 | 8094.531 |
| ↓Diffusion_Trust in Government             | -0.069   | 0.034 | -0.138 | -0.002 | 1.000 | 13768.887 | 8575.293 |
| ↑Diffusion_Trust in Scientist              | 0.117    | 0.033 | 0.053  | 0.182  | 1.000 | 13447.463 | 8353.061 |
| ↑Diffusion_Religiosity                     | 0.133    | 0.027 | 0.079  | 0.186  | 1.000 | 15604.929 | 7684.508 |
| Diffusion_Social Media Usage               | 0.003    | 0.031 | -0.058 | 0.063  | 1.000 | 12752.829 | 7902.828 |
| Diffusion_Video Usage                      | 0.054    | 0.034 | -0.012 | 0.118  | 1.000 | 16514.410 | 8095.875 |
| Diffusion_TV/Newspaper Usage               | 0.046    | 0.030 | -0.014 | 0.105  | 1.000 | 14421.758 | 7573.605 |
| Diffusion_Radio/Magazines Usage            | 0.023    | 0.028 | -0.032 | 0.078  | 1.000 | 15023.991 | 7531.058 |
| Diffusion_Online News Usage                | 0.047    | 0.029 | -0.010 | 0.104  | 1.001 | 15611.266 | 7845.108 |
| ↑Diffusion_Message App Usage               | 0.098    | 0.029 | 0.042  | 0.153  | 1.000 | 14386.782 | 8068.538 |
| Diffusion_Personal Website Usage           | -0.020   | 0.026 | -0.071 | 0.030  | 1.000 | 15314.912 | 7739.698 |
| ↑Diffusion_Cultural Capital (at Age 15)    | 0.161    | 0.041 | 0.081  | 0.242  | 1.000 | 10085.333 | 8175.397 |
| ↑Diffusion_Economic Capital (at Age 15)    | 0.116    | 0.046 | 0.027  | 0.204  | 1.000 | 10506.017 | 8425.536 |
| Diffusion_Having Books (at Age 15)         | 0.042    | 0.028 | -0.014 | 0.097  | 1.000 | 13873.743 | 7765.802 |
| Diffusion_Having Books (Now)               | 0.015    | 0.030 | -0.043 | 0.073  | 1.000 | 13604.291 | 8025.289 |
| Diffusion_Reading Books                    | 0.006    | 0.031 | -0.055 | 0.065  | 1.000 | 13836.940 | 7772.973 |
| Diffusion_Number of Friends                | -0.003   | 0.078 | -0.146 | 0.177  | 1.001 | 16191.172 | 6779.605 |
| Diffusion_Bachelor's degree (Parents)      | 0.032    | 0.031 | -0.028 | 0.093  | 1.000 | 15112.872 | 7878.232 |
| Diffusion_Postgraduate Degree (Parents)    | 0.027    | 0.026 | -0.025 | 0.078  | 1.001 | 13530.482 | 7756.842 |
| Diffusion_Social Class (Now): Upper        | 0.018    | 0.027 | -0.034 | 0.071  | 1.001 | 12532.762 | 8257.456 |
| ↑Diffusion_Social Class (Now): Lower       | 0.107    | 0.034 | 0.042  | 0.173  | 1.001 | 11951.424 | 8480.567 |
| ↑Diffusion_Social Class (at Age 15): Upper | 0.067    | 0.027 | 0.014  | 0.120  | 1.000 | 14529.348 | 7589.985 |
| Diffusion_Social Class (at Age 15): Lower  | -0.019   | 0.035 | -0.089 | 0.051  | 1.000 | 11919.090 | 8151.043 |
| ↑Diffusion_Upward Social Mobility          | 0.121    | 0.035 | 0.053  | 0.189  | 1.000 | 10558.517 | 8463.867 |

**Table S24:** Parameter Estimates for Diffusion Action by **Hierarchical Zero-Inflated Binomial Model** in Japan. This table presents the Bayesian estimation results for each parameter. The Parameter column indicates the variable name, Estimate shows the median of the posterior distribution (Posterior Median), SE is the standard error, and l95CI and u95CI indicate the lower and upper bounds of the 95% credible interval. Rhat is the convergence diagnostic, with values close to 1 indicating good convergence. Bulk\_ESS and Tail\_ESS represent the effective sample size for bulk and tail portions of the posterior distribution. Furthermore, parameters marked with ↑ indicate significant positive effects ( $P(\beta > 0) > 0.95$ ), while ↓ indicates significant negative effects ( $P(\beta < 0) > 0.95$ ).

**Table S25:** Estimated Results of Graded Response Model in the U.S.

| Item      | $a$  | $b_1$ | $b_2$ | $b_3$ | $b_4$ |
|-----------|------|-------|-------|-------|-------|
| U.consp1  | 1.64 | -0.15 | 1.37  | 1.92  | 2.70  |
| U.consp2  | 1.77 | -0.57 | 0.63  | 1.44  | 2.73  |
| U.consp3  | 1.97 | -0.26 | 0.78  | 1.51  | 2.66  |
| U.consp4  | 1.66 | -0.37 | 1.50  | 2.14  | 3.46  |
| U.consp5  | 1.77 | 0.66  | 1.95  | 2.35  | 3.68  |
| U.consp6  | 1.69 | 0.00  | 0.89  | 1.74  | 3.01  |
| U.consp7  | 1.47 | -0.02 | 1.69  | 2.22  | 3.71  |
| U.consp8  | 1.60 | -0.26 | 0.86  | 1.73  | 3.06  |
| U.consp9  | 2.02 | -0.14 | 1.09  | 1.66  | 2.83  |
| U.consp10 | 1.39 | -0.55 | 0.89  | 1.83  | 3.29  |
| U.consp11 | 1.99 | 0.01  | 1.01  | 1.67  | 2.92  |

**Note:** The categorization means:  $b_1$ : Not Recognition  $\rightarrow$  Recognition,  $b_2$ : Recognition  $\rightarrow$  Belief (Not Action),  $b_3$ : Belief (Not Action)  $\rightarrow$  Belief (Any Action), and  $b_4$ : Belief + Any Action (Demonstrative or Diffusion)  $\rightarrow$  Belief + Both Actions (Demonstrative and Diffusion).

**Table S26:** Estimated Results of Graded Response Model in Japan.

| Item      | $a$  | $b_1$ | $b_2$ | $b_3$ | $b_4$ |
|-----------|------|-------|-------|-------|-------|
| J.consp1  | 2.58 | 1.09  | 2.09  | 2.92  | 3.51  |
| J.consp2  | 2.06 | 0.54  | 1.42  | 2.63  | 3.48  |
| J.consp3  | 3.19 | 0.89  | 1.74  | 2.62  | 3.25  |
| J.consp4  | 2.40 | 1.03  | 1.71  | 2.79  | 3.45  |
| J.consp5  | 2.96 | 1.08  | 2.34  | 3.04  | 3.92  |
| J.consp6  | 3.27 | 1.68  | 2.52  | 3.11  | 3.76  |
| J.consp7  | 2.62 | 1.41  | 2.55  | 3.15  | 3.91  |
| J.consp8  | 1.92 | 0.75  | 1.76  | 3.12  | 4.35  |
| J.consp9  | 2.85 | 1.16  | 2.02  | 2.85  | 3.59  |
| J.consp10 | 2.31 | 1.07  | 2.02  | 3.09  | 3.90  |
| J.consp11 | 3.60 | 1.61  | 2.31  | 2.93  | 3.53  |

**Note:** The categorization means:  $b_1$ : Not Recognition  $\rightarrow$  Recognition,  $b_2$ : Recognition  $\rightarrow$  Belief (Not Action),  $b_3$ : Belief (Not Action)  $\rightarrow$  Belief (Any Action), and  $b_4$ : Belief + Any Action (Demonstrative or Diffusion)  $\rightarrow$  Belief + Both Actions (Demonstrative and Diffusion).



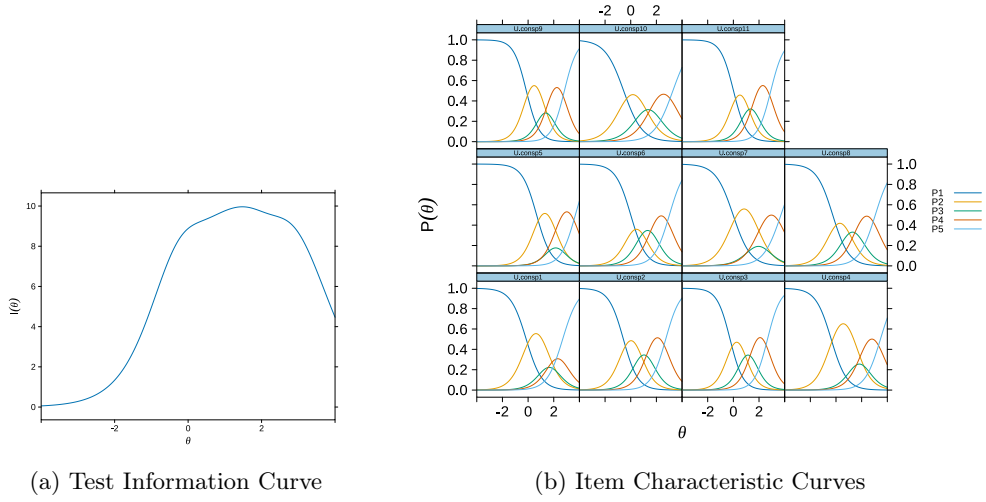

**Fig. S39:** Test Information Curve and Item Characteristic Curves in the Item Response Theory (IRT) Model in the U.S. (a) The Test Information Curve shows the amount of information provided by the test across different levels of the latent trait. Higher peaks indicate that the test is most precise in estimating individuals with those trait levels. (b) The Item Characteristic Curves depict the probability of endorsing each item at different levels of the latent trait. The curves illustrate how item responses change as the engagement stage in conspiracy theories.

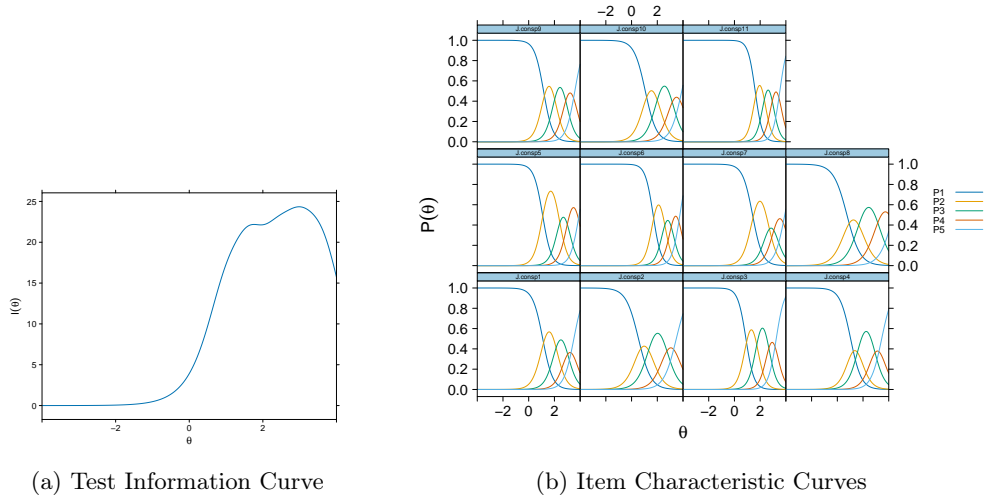

**Fig. S40:** Test Information Curve and Item Characteristic Curves in the Item Response Theory (IRT) Model in Japan. (a) The Test Information Curve shows the amount of information provided by the test across different levels of the latent trait. Higher peaks indicate that the test is most precise in estimating individuals with those trait levels. (b) The Item Characteristic Curves depict the probability of endorsing each item at different levels of the latent trait. The curves illustrate how item responses change as the engagement stage in conspiracy theories.
